# Supplementary material
Source: Royal Society of Chemistry journal article supplement (doi:10.1039/d6ob00314a)
Supplement: d6ob00314a1.pdf [file d6ob00314a1.pdf]

## Supporting Information

# Palladium Catalyzed Cross-Couplings of *trans*- Vinylboranes with Alkyl Bromides: A Reversed- Polarity Alternative to B-Alkyl Suzuki Reactions

*Petros Danielsen Siapkara*,<sup>a</sup> *Kristian Sørnes*,<sup>b</sup> *Jens Mortansson Jelstrup Nolsøe*,<sup>c</sup> *Filip Ekholm*,<sup>d</sup> *Eirik Johansson Solum*<sup>e</sup> and *Marius Aursnes*<sup>a\*</sup>

<sup>a</sup> Faculty of Chemistry, Biotechnology and Food Science, Norwegian University of Life Sciences, Ås NO-1433, Norway.

<sup>b</sup> Department of Chemistry, University of Oslo, Norway, Oslo NO-0371, Norway.

<sup>c</sup> Faculty of Biosciences and Aquaculture, Nord University, Bodø NO-8049, Norway.

<sup>d</sup> Department of Chemistry, University of Helsinki, Helsinki FI-00014, Finland.

<sup>e</sup> Faculty of Nursing and Health Sciences, Nord University, Bodø NO-8049, Norway.

|                                                                              |    |
|------------------------------------------------------------------------------|----|
| <b>Innhold</b>                                                               |    |
| <b>Experimental procedures</b> .....                                         | 2  |
| <b><sup>1</sup>H and <sup>13</sup>C NMR-spectra</b> .....                    | 14 |
| <b>Quantum Mechanical Spectral Analysis (QMSA) employing Chemadder</b> ..... | 34 |
| <b>HRMS-spectra</b> .....                                                    | 39 |
| <b>References</b> .....                                                      | 56 |

## Experimental procedures

**Methyl (*R*)-4-((*tert*-butyldimethylsilyl)oxy)hex-5-ynoate (9b)** Known methyl (*R*)-4-((*tert*-butyldimethylsilyl)oxy)-6-(trimethylsilyl)hex-5-ynoate<sup>1</sup> (**9a**) (1.00 g, 3.04 mmol, 1.00 equiv.) was dissolved in methanol (30 mL) and the flask was cooled to 0 °C in an ice-water-bath. K<sub>2</sub>CO<sub>3</sub> (421 mg, 3.04 mmol, 1.00 equiv.) was added in one portion and the reaction mixture was allowed to warm to room temperature. When the deprotection process was deemed complete (TLC analysis), the flask was cooled back to 0 °C and quenched by the addition of phosphate buffer (20 mL, pH = 7). NaCl (~2 g) was added and the aqueous phase was extracted with heptane (5 x ~30 mL). The combined organic phase was dried (Na<sub>2</sub>SO<sub>4</sub>), filtrated and concentrated *in vacuo*. The crude material thus obtained was purified by flash column chromatography (SiO<sub>2</sub>, 5% EtOAc in heptane) to give the titled product as an oil (711 mg, 2.77 mmol, 91%). *R*<sub>f</sub>(5% EtOAc in heptane) = 0.29; [α]<sub>D</sub><sup>25</sup> = +91 (c = 1.1, CH<sub>2</sub>Cl<sub>2</sub>); <sup>1</sup>H NMR (400 MHz, CDCl<sub>3</sub>) δ 4.46 (td, *J* = 6.1, 2.1 Hz, 1H), 3.68 (s, 3H), 2.53 – 2.45 (m, 2H), 2.39 (d, *J* = 2.1 Hz, 1H), 2.06 – 1.94 (m, 2H), 0.90 (s, 9H), 0.12 (d, *J* = 12.6 Hz, 6H). <sup>13</sup>C{<sup>1</sup>H} NMR (100 MHz, CDCl<sub>3</sub>) δ 173.8, 84.8, 72.7, 61.7, 51.7, 33.5, 29.6, 25.9, 18.3, -4.5, -5.0;

**(*E*)-7-phenylhept-5-enenitrile (3).** *Method III was employed for hydroboration.* A flame-dried flask **A** under nitrogen was charged with 3-phenyl-1-propyne (100 mg, 0.861 mmol, 1.00 equiv.). 9-BBN-H (0.5 M in THF, 3.44 mL, 1.72 mmol, 2.00 equiv.) was then added, and the solution was allowed to stir overnight. Next, benzaldehyde (Sure/Seal™ flask, 87.5 μL, 0.861 mmol, 1.00 equiv.) was added dropwise and the solution was stirred for 6 h. (Theoretically, this corresponds to 1.20 equiv. of vinylborane relative to the alkyl bromide.)

*Cross-coupling.* An undried flask **B** was charged with Cs<sub>2</sub>CO<sub>3</sub> (841 mg, 2.58 mmol, 3.00 equiv.), and the flask was evacuated and backfilled with dry nitrogen gas. PCy<sub>3</sub>-Pd-G4 (22.9 mg, 0.0344 mmol, 4.00 mol%) and HPCy<sub>3</sub>BF<sub>4</sub> (12.7 mg, 0.0344 mmol, 4.00 mol%) were quickly added, and then the flask was again evacuated and backfilled with dry nitrogen gas (3x). 4-Bromobutyronitrile

(106 mg, 0.717 mmol, 1.00 equiv.) was added to flask A and this resulting solution was then added to the flask B containing the catalyst system and base to initiate the reaction. The suspension was stirred rapidly overnight and then filtered through a plug of silica gel. The plug was washed thoroughly with Et<sub>2</sub>O, and the filtrate was concentrated *in vacuo*. The crude product was purified by flash column chromatography (SiO<sub>2</sub>, 0 → 20% Et<sub>2</sub>O in heptane) to give product **3** as an oil (109 mg, 0.588 mmol, 82%). *R<sub>f</sub>* (20% Et<sub>2</sub>O in heptane) = 0.20; <sup>1</sup>H NMR (400 MHz, CDCl<sub>3</sub>) δ 7.36 – 7.27 (m, 2H), 7.25 – 7.12 (m, 3H), 5.69 (dtt, *J* = 14.9, 6.7, 1.4 Hz, 1H), 5.44 (dtt, *J* = 15.2, 6.8, 1.5 Hz, 1H), 3.36 (d, *J* = 6.7 Hz, 2H), 2.33 (t, *J* = 7.2 Hz, 2H), 2.23 – 2.16 (m, 2H), 1.75 (p, *J* = 7.2 Hz, 2H); <sup>13</sup>C{<sup>1</sup>H} NMR (100 MHz, CDCl<sub>3</sub>) δ 140.5, 131.6, 129.0, 128.6, 126.2, 119.8, 39.1, 31.3, 25.2, 16.5; HRESIMS *m/z* 208.1096 [M + Na]<sup>+</sup> (calcd for C<sub>13</sub>H<sub>15</sub>NNa, 208.1097).

**(E)-(5-(benzyloxy)pent-1-en-1-yl)trimethylsilane (4).** *Method III* was employed for hydroboration. A flame-dried flask A under nitrogen was charged with trimethylsilylacetylene (100 mg, 1.02 mmol, 1.00 equiv.). 9-BBN-H (0.5 M in THF, 4.07 mL, 2.04 mmol, 2.00 equiv.) was then added, and the solution was allowed to stir overnight. Next, benzaldehyde (Sure/Seal™ flask, 104 μL, 1.02 mmol, 1.00 equiv.) was added dropwise and the solution was stirred for 6 h. (Theoretically, this corresponds to 1.20 equiv. of vinylborane relative to the alkyl bromide.)

*Cross-coupling.* An undried flask B was charged with Cs<sub>2</sub>CO<sub>3</sub> (995 mg, 3.05 mmol, 3.00 equiv.), and the flask was evacuated and backfilled with dry nitrogen gas. PCy<sub>3</sub>-Pd-G4 (27.0 mg, 0.0407 mmol, 4.00 mol%) and HPCy<sub>3</sub>BF<sub>4</sub> (15.0 mg, 0.0407 mmol, 4.00 mol%) were quickly added, and then the flask was again evacuated and backfilled with dry nitrogen gas (3x). Benzyl 3-bromopropyl ether (194 mg, 0.848 mmol, 1.00 equiv.) was added to flask A and this resulting solution was then added to the flask B containing the catalyst system and base to initiate the reaction. The suspension was stirred rapidly overnight and then filtered through a plug of silica gel. The plug was washed thoroughly with Et<sub>2</sub>O, and the filtrate was concentrated *in vacuo*. The crude product was purified by flash column chromatography (SiO<sub>2</sub>, 0 → 5% Et<sub>2</sub>O in heptane) to

give product **4** as an oil (162 mg, 0.652 mmol, 77%).  $R_f$ (4% Et<sub>2</sub>O in heptane) = 0.30; <sup>1</sup>H NMR (400 MHz, CDCl<sub>3</sub>) δ 7.35 – 7.29 (m, 5H), 6.02 (dt,  $J$  = 18.5, 6.2 Hz, 1H), 5.64 (dt,  $J$  = 18.5, 1.5 Hz, 1H), 4.50 (s, 2H), 3.48 (t,  $J$  = 6.5 Hz, 2H), 2.20 (tdd,  $J$  = 7.8, 6.2, 1.6 Hz, 2H), 1.73 (p,  $J$  = 6.6 Hz, 2H), 0.04 (s, 9H); <sup>13</sup>C{<sup>1</sup>H} NMR (100 MHz, CDCl<sub>3</sub>) δ 146.5, 138.8, 130.4, 128.5, 127.8, 127.6, 73.0, 69.9, 33.3, 28.9, -1.0; HRESIMS  $m/z$  271.1487 [M + Na]<sup>+</sup> (calcd for C<sub>15</sub>H<sub>24</sub>OSiNa, 271.1489).

**Ethyl (E)-6-(pyridin-3-yl)hex-5-enoate (5).** *Method I was employed for hydroboration.* A flame-dried flask **A** under nitrogen was charged with 3-ethynylpyridine (100 mg, 0.970 mmol, 1.00 equiv.) and azeotropically dried with 2-MeTHF (anhydrous over molecular sieves, 2 x ~0.5 mL). The flask was evacuated and backfilled with dry nitrogen gas (3x). Next, the flask was cooled to 0 °C in an ice-water-bath and then 9-BBN-H (0.5 M in THF, 1.94 mL, 0.970 mmol, 1.00 equiv.) was added in a dropwise manner. The reaction mixture was stirred overnight while warming up to room temperature. The reaction mixture was diluted with anhydrous THF (1.94 mL). (Theoretically, this corresponds to 1.20 equiv. of vinylborane relative to the alkyl bromide.)

*Cross-coupling.* An undried flask **B** was charged with Cs<sub>2</sub>CO<sub>3</sub> (948 mg, 2.91 mmol, 3.00 equiv.) and the flask was evacuated and backfilled with dry nitrogen gas. PCy<sub>3</sub>-Pd-G4 (25.8 mg, 0.0388 mmol, 4.00 mol%) and HPCy<sub>3</sub>BF<sub>4</sub> (14.3 mg, 0.0388 mmol, 4.00 mol%) were quickly added, and then the flask was again evacuated and backfilled with dry nitrogen gas (3x). Ethyl 4-bromobutyrate (158 mg, 0.810 mmol, 1.00 equiv.) was added to the hydroboration solution in flask **A** and this resulting solution was then added to the flask **B** containing the catalyst system and base to initiate the reaction. The suspension was stirred rapidly overnight and then filtered through a plug of silica gel. The plug was washed thoroughly with EtOAc, and the filtrate was concentrated *in vacuo*. The crude product was purified by flash column chromatography (SiO<sub>2</sub>, 0 →80% EtOAc in heptane) to give product **5** as an oil (53 mg, 0.24 mmol, 30%).  $R_f$ (50% EtOAc in heptane) = 0.16; <sup>1</sup>H NMR (400 MHz, CDCl<sub>3</sub>) δ 8.54 (d,  $J$  = 2.2 Hz, 1H), 8.42 (dd,  $J$  = 4.8, 1.6 Hz, 1H), 7.64 (dt,  $J$  = 7.9, 2.0 Hz, 1H), 7.24 – 7.18 (m, 1H), 6.41 – 6.34 (m, 1H), 6.25 (dt,  $J$  = 15.9, 6.8 Hz, 1H),

4.12 (q,  $J = 7.1$  Hz, 2H), 2.35 (t,  $J = 7.4$  Hz, 2H), 2.27 (ddd,  $J = 7.8, 6.8, 1.3$  Hz, 2H), 1.83 (p,  $J = 7.5$  Hz, 2H), 1.24 (t,  $J = 7.1$  Hz, 3H);  $^{13}\text{C}\{^1\text{H}\}$  NMR (100 MHz,  $\text{CDCl}_3$ )  $\delta$  173.6, 148.2, 148.1, 133.2, 132.6, 132.3, 127.4, 123.5, 60.5, 33.8, 32.6, 24.5, 14.4; HRESIMS  $m/z$  220.1328 [ $\text{M} + \text{H}$ ] $^+$  (calcd for  $\text{C}_{13}\text{H}_{18}\text{NO}_2$ , 220.1332).

**(E)-2-(dec-2-en-1-yl)isoindoline-1,3-dione (6).** Method III was employed for hydroboration. A flame-dried flask **A** under nitrogen was charged with *N*-propargylphthalimide (100 mg, 0.540 mmol, 1.00 equiv.) and azeotropically dried with 2-MeTHF (anhydrous over molecular sieves, 2 x ~0.5 mL). The flask was evacuated and backfilled with dry nitrogen gas (3x). 9-BBN-H (0.5 M in THF, 2.16 mL, 1.08 mmol, 2.00 equiv.) was then added, and the solution was allowed to stir overnight. Next, benzaldehyde (Sure/Seal™ flask, 54.9  $\mu\text{L}$ , 0.540 mmol, 1.00 equiv.) was added dropwise and the solution was stirred for 6 h. (Theoretically, this corresponds to 1.20 equiv. of vinylborane relative to the alkyl bromide.)

*Cross-coupling.* An undried flask **B** was charged with  $\text{Cs}_2\text{CO}_3$  (528 mg, 1.62 mmol, 3.00 equiv.), and the flask was evacuated and backfilled with dry nitrogen gas.  $\text{PCy}_3\text{-Pd-G4}$  (14.3 mg, 0.0216 mmol, 4.00 mol%) and  $\text{HPCy}_3\text{BF}_4$  (7.95 mg, 0.0216 mmol, 4.00 mol%) were quickly added, and then the flask was again evacuated and backfilled with dry nitrogen gas (3x). 1-Bromoheptane (80.6 mg, 0.450 mmol, 1.00 equiv.) was added to flask **A** and this resulting solution was then added to the flask **B** containing the catalyst system and base to initiate the reaction. The suspension was stirred rapidly overnight and then filtered through a plug of silica gel. The plug was washed thoroughly with EtOAc, and the filtrate was concentrated *in vacuo*. The crude product was purified by flash column chromatography ( $\text{SiO}_2$ , 0  $\rightarrow$  15% EtOAc in heptane) to give product **6**<sup>2</sup> as an oil (100 mg, 0.350 mmol, 78%).  $R_f$  (10% EtOAc in heptane) = 0.16;  $^1\text{H}$  NMR (400 MHz,  $\text{CDCl}_3$ )  $\delta$  7.78 (dd,  $J = 5.4, 3.0$  Hz, 2H), 7.64 (dd,  $J = 5.5, 3.0$  Hz, 2H), 5.68 (dt,  $J = 14.8, 6.7, 1.3$  Hz, 1H), 5.48 – 5.38 (m, 1H), 4.16 (dq,  $J = 6.2, 1.1$  Hz, 2H), 1.99 – 1.88 (m, 2H), 1.30 – 1.13 (m, 11H), 0.81 – 0.76 (m, 3H);  $^{13}\text{C}\{^1\text{H}\}$  NMR (100 MHz,  $\text{CDCl}_3$ )  $\delta$  168.0, 135.4, 133.9, 132.2, 123.2,

123.0, 39.6, 32.1, 31.8, 29.1, 28.9, 22.6, 14.1; HRESIMS  $m/z$  308.1620  $[M + Na]^+$  (calcd for  $C_{18}H_{23}NO_2Na$ , 308.1621).

**(S,E)-(5,9-dimethyldeca-1,8-dien-1-yl)trimethylsilane (7).** *Method III* was employed for hydroboration. A flame-dried flask **A** under nitrogen was charged with trimethylsilylacetylene (1000 mg, 10.2 mmol, 1.00 equiv.). 9-BBN-H (0.5 M in THF, 40.7 mL, 20.4 mmol, 2.00 equiv.) was then added, and the solution was allowed to stir overnight. Next, benzaldehyde (Sure/Seal™ flask, 1.03 mL, 10.2 mmol, 1.00 equiv.) was added dropwise and the solution was stirred for 8 h. (Theoretically, this corresponds to 1.20 equiv. of vinylborane relative to the alkyl bromide.)

*Cross-coupling.* An undried flask **B** was charged with  $CS_2CO_3$  (9.95 g, 30.5 mmol, 3.00 equiv.), and the flask was evacuated and backfilled with dry nitrogen gas.  $PCy_3$ -Pd-G4 (270 mg, 0.407 mmol, 4.00 mol%) and  $HPCy_3BF_4$  (150 mg, 0.407 mmol, 4.00 mol%) were quickly added, and then the flask was again evacuated and backfilled with dry nitrogen gas (3x). (S)-(+)-citronellyl bromide (1859 mg, 8.48 mmol, 1.00 equiv.) was added to flask **A** and this resulting solution was then added to the flask **B** containing the catalyst system and base to initiate the reaction. The flask and syringe were washed with a small amount of THF (~5 mL) and this was added to the flask with the catalyst system. The suspension was stirred rapidly overnight and then filtered through a plug of silica gel. The plug was washed thoroughly with  $Et_2O$ , and the filtrate was concentrated *in vacuo*. The crude product was purified by flash column chromatography ( $SiO_2$ , 0 → 1%  $Et_2O$  in heptane) to give product **4** as an oil (1640 mg, 6.88 mmol, 81%).  $R_f$  (1%  $Et_2O$  in heptane) = 0.65;  $[\alpha]_D^{25} = +57.0$  ( $c = 1.00$ ,  $CH_2Cl_2$ );  $^1H$  NMR (400 MHz,  $CDCl_3$ )  $\delta$  6.02 (dt,  $J = 18.5, 6.2$  Hz, 1H), 5.62 (dt,  $J = 18.6, 1.6$  Hz, 1H), 5.10 (m, 1H), 2.20 – 2.02 (m, 2H), 2.02 – 1.88 (m, 2H), 1.68 (q,  $J = 1.3$  Hz, 3H), 1.63 – 1.57 (m, 3H), 1.47 – 1.25 (m, 4H), 1.18 – 1.09 (m, 1H), 0.87 (d,  $J = 6.4$  Hz, 3H), 0.04 (s, 9H);  $^{13}C\{^1H\}$  NMR (100 MHz,  $CDCl_3$ )  $\delta$  147.8, 131.2, 129.5, 125.1, 37.2, 36.0, 34.4, 32.2, 25.9, 25.7, 19.7, 17.8, -1.0; HRESIMS  $m/z$  255.2136  $[M + H]^+$  (calcd for  $C_{15}H_{31}O_2Si$ , 255.2139).

**(R,E)-((13-(1,3-dioxolan-2-yl)tridec-10-en-2-yl)oxy)(tert-butyl)dimethylsilane (8).** *Method III* was employed for hydroboration. A flame-dried flask **A** under nitrogen was charged with (*R*)-tert-butyl dimethyl(undec-10-yn-2-yloxy)silane<sup>3</sup> (150 mg, 0.531 mmol, 1.00 equiv.) and azeotropically dried with 2-MeTHF (anhydrous over molecular sieves, 2 x ~0.5 mL). The flask was evacuated and backfilled with dry nitrogen gas (3x). 9-BBN-H (0.5 M in THF, 2.12 mL, 1.06 mmol, 2.00 equiv.) was then added, and the solution was allowed to stir overnight. Next, benzaldehyde (Sure/Seal™ flask, 54.0 μL, 0.531 mmol, 1.00 equiv.) was added dropwise and the solution was stirred for 6 h. (Theoretically, this corresponds to 1.20 equiv. of vinylborane relative to the alkyl bromide.)

*Cross-coupling.* An undried flask **B** was charged with Cs<sub>2</sub>CO<sub>3</sub> (519 mg, 1.59 mmol, 3.00 equiv.), and the flask was evacuated and backfilled with dry nitrogen gas. PCy<sub>3</sub>-Pd-G4 (14.1 mg, 0.0212 mmol, 4.00 mol%) and HPCy<sub>3</sub>BF<sub>4</sub> (7.82 mg, 0.0212 mmol, 4.00 mol%) were quickly added, and then the flask was again evacuated and backfilled with dry nitrogen gas (3x). 2-(2-Bromoethyl)-1,3-dioxolane (80.1 mg, 0.442 mmol, 1.00 equiv.) was added to flask **A** and this resulting solution was then added to the flask **B** containing the catalyst system and base to initiate the reaction. The suspension was stirred rapidly overnight and then filtered through a plug of silica gel. The plug was washed thoroughly with Et<sub>2</sub>O, and the filtrate was concentrated *in vacuo*. The crude product was purified by flash column chromatography (SiO<sub>2</sub>, 0 → 15% Et<sub>2</sub>O in heptane) to give product **8** as an oil (146 mg, 0.380 mmol, 86%). *R*<sub>f</sub> (10% EtOAc in heptane) = 0.37; [α]<sub>D</sub><sup>25</sup> = -29.3 (c = 1.00, CH<sub>2</sub>Cl<sub>2</sub>); <sup>1</sup>H NMR (400 MHz, CDCl<sub>3</sub>) δ 5.51 – 5.33 (m, 2H), 4.86 (t, *J* = 4.8 Hz, 1H), 4.06 – 3.81 (m, 4H), 3.80 – 3.72 (m, 1H), 2.17 – 2.06 (m, 2H), 2.01 – 1.91 (m, 2H), 1.76 – 1.67 (m, 2H), 1.47 – 1.21 (m, 12H), 1.11 (d, *J* = 6.1 Hz, 3H), 0.88 (s, 9H), 0.04 (d, *J* = 0.8 Hz, 6H); <sup>13</sup>C{<sup>1</sup>H} NMR (100 MHz, CDCl<sub>3</sub>) δ 131.2, 129.1, 104.3, 68.8, 65.0, 39.9, 34.0, 32.7, 29.8, 29.7, 29.7, 29.3, 27.3, 26.1, 26.0, 24.0, 18.3, -4.3, -4.5; HRESIMS *m/z* 407.2951 [M + Na]<sup>+</sup> (calcd for C<sub>22</sub>H<sub>44</sub>O<sub>3</sub>SiNa, 407.2952).

**Methyl (4R,9R,E)-4-((tert-butyl dimethylsilyl)oxy)-9,13-dimethyltetradeca-5,12-dienoate (10).** *Method I* was employed for hydroboration. A flame-dried flask **A** under nitrogen was charged

with *methyl (R)-4-((tert-butyldimethylsilyloxy)hex-5-ynoate* (100 mg, 0.390 mmol, 1.00 equiv.) and azeotropically dried with 2-MeTHF (anhydrous over molecular sieves, 2 x ~0.5 mL). The flask was evacuated and backfilled with dry nitrogen gas (3x). Next, the flask was cooled to 0 °C in an ice-water-bath and then 9-BBN-H (0.5 M in THF, 0.780 mL, 0.390 mmol, 1.00 equiv.) was added in a dropwise manner. The reaction mixture was stirred overnight while warming up to room temperature. The reaction mixture was diluted with anhydrous THF (0.78 mL). (Theoretically, this corresponds to 1.20 equiv. of vinylborane relative to the alkyl bromide.)

*Cross-coupling.* An undried flask **B** was charged with Cs<sub>2</sub>CO<sub>3</sub> (381 mg, 1.17 mmol, 3.00 equiv.) and the flask was evacuated and backfilled with dry nitrogen gas. PCy<sub>3</sub>-Pd-G4 (10.4 mg, 0.0156 mmol, 4.00 mol%) and HPCy<sub>3</sub>BF<sub>4</sub> (5.74 mg, 0.0156 mmol, 4.00 mol%) were quickly added, and then the flask was again evacuated and backfilled with dry nitrogen gas (3x). (S)-(+)-citronellyl bromide (71.2 mg, 0.325 mmol, 1.00 equiv.) was added to the hydroboration solution in flask **A** and this resulting solution was then added to the flask **B** containing the catalyst system and base to initiate the reaction. The suspension was stirred rapidly overnight and then filtered through a plug of silica gel. The plug was washed thoroughly with Et<sub>2</sub>O, and the filtrate was concentrated *in vacuo*. The crude product was purified by flash column chromatography (SiO<sub>2</sub>, 0 →10% Et<sub>2</sub>O in heptane) to give product **10** as an oil (103 mg, 0.26 mmol, 80%). *R*<sub>f</sub>(5% EtOAc in heptane) = 0.29;  $[\alpha]_{\text{D}}^{25} = +8.0$  (*c* = 1.0, CHCl<sub>3</sub>); <sup>1</sup>H NMR (400 MHz, CDCl<sub>3</sub>) δ 5.53 (dtd, *J* = 15.5, 6.7, 1.0 Hz, 1H), 5.35 (dtd, *J* = 15.4, 6.8, 1.4 Hz, 1H), 5.14 – 5.05 (m, 1H), 4.09 (q, *J* = 6.3 Hz, 1H), 3.66 (s, 3H), 2.35 (dd, *J* = 8.2, 7.1 Hz, 2H), 2.09 – 1.86 (m, 4H), 1.82 – 1.73 (m, 2H), 1.68 (q, *J* = 1.4 Hz, 3H), 1.60 (d, *J* = 1.3 Hz, 3H), 1.42 – 1.10 (m, 5H), 0.87 (d, *J* = 2.0 Hz, 9H), 0.86 (d, *J* = 5.5 Hz, 3H), 0.02 (d, *J* = 6.9 Hz, 6H); <sup>13</sup>C{<sup>1</sup>H} NMR (100 MHz, CDCl<sub>3</sub>) δ 174.3, 132.5, 131.4, 131.1, 124.9, 72.6, 51.5, 37.0, 36.5, 33.2, 31.9, 29.8, 29.6, 25.9, 25.7, 25.5, 19.4, 18.2, 17.6, -4.2, -4.9; HRESIMS *m/z* 419.2950 [M + Na]<sup>+</sup> (calcd for C<sub>23</sub>H<sub>44</sub>NO<sub>3</sub>SiNa, 419.2952).

**Cis-3-ethynyl-2,2,4,4-tetramethylcyclopentan-1-ol (11b)** To a stirred solution of 3-ethynyl-2,2,4,4-tetramethylcyclopentan-1-one\* (1.00 g, 6.09 mmol, 1.00 equiv) in MeOH (30 mL), NaBH<sub>4</sub> (461 mg, 12.2 mmol, 2.00 equiv) was added portionwise at 0 °C. The reaction mixture was stirred at this temperature for 45 min and then quenched with sat. aq. NH<sub>4</sub>Cl (10 mL). EtOAc (30 mL) was added, and the biphasic mixture was separated. The aqueous layer was extracted with EtOAc (3 x 30 mL). The combined organic phases were washed with brine, dried (Na<sub>2</sub>SO<sub>4</sub>) and concentrated *in vacuo* to give the **11b** (898 mg, 5.40 mmol, 89%, d.r. 20:1 based on <sup>1</sup>H NMR) as a colorless oil, which was used in the next step without further purification. R<sub>f</sub>(20% EtOAc in heptane) = 0.15. <sup>1</sup>H NMR (400 MHz, CDCl<sub>3</sub>) δ 3.75 (dd, *J* = 10.6, 7.4 Hz, 1H), 2.27 – 2.16 (m, 2H), 1.90 (dd, *J* = 12.8, 7.4 Hz, 1H), 1.56 (dd, *J* = 12.9, 10.6 Hz, 1H), 1.43 (s, 1H), 1.14 (s, 3H), 1.06 (s, 6H), 0.95 (s, 3H). <sup>13</sup>C NMR (101 MHz, CDCl<sub>3</sub>) δ 82.3, 79.1, 73.4, 51.8, 47.1, 46.2, 35.9, 33.2, 28.8, 27.1, 16.5. HRESIMS *m/z* 189.1251 [M + Na]<sup>+</sup> (calcd for C<sub>11</sub>H<sub>18</sub>NaO, 189.1250).

**Tert-butyl(((cis)-3-ethynyl-2,2,4,4-tetramethylcyclopentyl)oxy)dimethylsilane (11c)** To a stirred solution of *cis*-3-ethynyl-2,2,4,4-tetramethylcyclopentan-1-ol (**11b**) (890 mg, 5.35 mmol, 1.00 equiv) in CH<sub>2</sub>Cl<sub>2</sub> (18 mL) at 0 °C were added 2,6-lutidine (1.25 mL, 10.7 mmol, 2.00 equiv) and TBSOTf (1.47 mL, 6.40, 1.20 equiv). The reaction mixture was stirred at this temperature for 1h. The reaction was then quenched with sat. aq. NH<sub>4</sub>Cl (15 mL) and the biphasic mixture was

---

\* This alkyne was obtained as a byproduct in a thermal intramolecular [2+2] cycloaddition of a precursor allene in the synthesis of (±)-lineatin.<sup>1</sup> In December 1981, during purification of the desired bicyclic compound, the alkyne was precipitated with AgNO<sub>3</sub>, regenerated with NaCN and purified by sublimation. Thereafter, it was guarded from being thrown away for over 40 years.

(1) Skattebøl, L.; Stenstrøm, Y. *Tetrahedron Lett.*, **1983**, 3021-3024. Skattebøl, L.; Stenstrøm, Y. *Acta Chem. Scand.*, **1985**, 291-304.

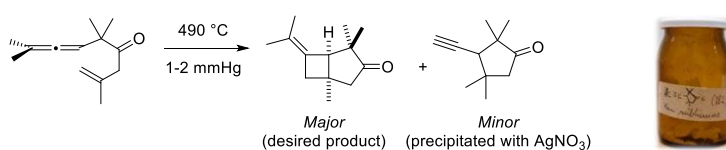

separated. The aqueous layer was extracted with CH<sub>2</sub>Cl<sub>2</sub> (3 x 15 mL). The combined organic layers were washed with brine, dried (Na<sub>2</sub>SO<sub>4</sub>) and concentrated *in vacuo*. The crude product was purified with flash column chromatography (SiO<sub>2</sub>, 0 → 2% EtOAc in heptane) to give compound **11c** as a colorless oil (1.35 g, 4.81 mmol, 90%). R<sub>f</sub>(2% EtOAc in heptane) = 0.67. <sup>1</sup>H NMR (400 MHz, CDCl<sub>3</sub>) δ 3.66 (dd, *J* = 10.2, 7.3 Hz, 1H), 2.18 (s, 2H), 1.72 (dd, *J* = 12.7, 7.3 Hz, 1H), 1.61 – 1.51 (m, 1H), 1.13 (s, 3H), 1.04 (s, 3H), 0.99 (s, 3H), 0.91 (s, 3H), 0.90 – 0.84 (m, 9H), 0.04 (s, 3H), 0.02 (s, 3H); <sup>13</sup>C NMR (101 MHz, CDCl<sub>3</sub>) δ 82.8, 78.9, 73.0, 51.3, 47.6, 46.7, 36.0, 33.4, 28.8, 27.5, 25.9, 25.9, 18.2, 17.0, -4.3, -4.8. HRESIMS *m/z* 303.2106 [M + Na]<sup>+</sup> (calcd for C<sub>17</sub>H<sub>32</sub>NaOSi, 303.2115).

**Benzyl (E)-(8-(cis-3-((tert-butyl)dimethylsilyloxy)-2,2,5,5-tetramethylcyclopentyl)oct-7-en-1-yl)carbamate (11)** Method I was employed for hydroboration. A flame-dried flask **A** under nitrogen was charged with *tert*-butyl(((*cis*)-3-ethynyl-2,2,4,4-tetramethylcyclopentyl)oxy)dimethylsilane (100 mg, 0.356 mmol, 1.00 equiv.) and azeotropically dried with 2-MeTHF (anhydrous over molecular sieves, 2 x ~0.5 mL). The flask was evacuated and backfilled with dry nitrogen gas (3x). 9-BBN-H (0.5 M in THF, 713 μL, 0.356 mmol, 1.00 equiv.) was then added, and the solution was allowed to stir overnight. The reaction mixture was diluted with anhydrous THF (0.71 mL). (Theoretically, this corresponds to 1.20 equiv. of vinylborane relative to the alkyl bromide.)

Cross-coupling. An undried flask **B** was charged with Cs<sub>2</sub>CO<sub>3</sub> (348 mg, 1.07 mmol, 3.00 equiv.), and the flask was evacuated and backfilled with dry nitrogen gas. PCy<sub>3</sub>-Pd-G4 (9.47 mg, 0.0143 mmol, 4.00 mol%), HPCy<sub>3</sub>BF<sub>4</sub> (5.25 mg, 0.0143 mmol, 4.00 mol%) and benzyl (6-bromohexyl)carbamate (93.3 mg, 0.297 mmol, 1.00 equiv.) were quickly added, and then the flask was again evacuated and backfilled with dry nitrogen gas (3x). The resulting solution from flask **A** was then added to the flask **B** containing the catalyst system and base to initiate the reaction. The suspension was stirred rapidly overnight and then filtered through a plug of silica

gel. The plug was washed thoroughly with Et<sub>2</sub>O, and the filtrate was concentrated *in vacuo*. The crude product was purified by flash column chromatography (SiO<sub>2</sub>, 0 → 20% EtOAc in heptane) to give product **11** (116 mg, 0.225 mmol, 76%). R<sub>f</sub>(20% EtOAc in heptane) = 0.29. <sup>1</sup>H NMR (400 MHz, CDCl<sub>3</sub>) δ 7.44 – 7.26 (m, 5H), 5.39 – 5.24 (m, 2H), 5.10 (s, 2H), 4.71 (s, 1H), 3.62 (dd, *J* = 10.2, 7.3 Hz, 1H), 3.19 (q, *J* = 6.7 Hz, 2H), 2.03 (q, *J* = 6.1 Hz, 2H), 1.68 (dd, *J* = 12.7, 7.3 Hz, 1H), 1.58 (dd, *J* = 18.8, 8.7 Hz, 2H), 1.52 – 1.42 (m, 2H), 1.42 – 1.23 (m, 6H), 0.93 (s, 3H), 0.90 (s, 3H), 0.89 (s, 9H), 0.79 (s, 3H), 0.76 (s, 3H), 0.03 (s, 3H), 0.02 (s, 3H); <sup>13</sup>C NMR (101 MHz, CDCl<sub>3</sub>) δ 156.5, 136.8, 133.1, 128.7, 128.3, 128.2, 127.6, 79.5, 66.7, 61.6, 47.9, 46.4, 41.3, 36.8, 33.2, 32.7, 30.1, 29.7, 28.8, 27.9, 27.3, 26.7, 26.0, 18.3, 16.1, -4.3, -4.8. HRESIMS *m/z* 538.3673 [M + Na]<sup>+</sup> (calcd for C<sub>31</sub>H<sub>53</sub>NNaO<sub>3</sub>Si, 538.3687).

**Methyl (E)-4-(8-(((benzyloxy)carbonyl)amino)oct-1-en-1-yl)benzoate (12)** Method III was employed for hydroboration. A flame-dried flask **A** under nitrogen was charged with methyl 4-ethynylbenzoate (100 mg, 0.624 mmol, 1.00 equiv.) and azeotropically dried with 2-MeTHF (anhydrous over molecular sieves, 2 x ~0.5 mL). The flask was evacuated and backfilled with dry nitrogen gas (3x). 9-BBN-H (0.5 M in THF, 2.50 mL, 1.25 mmol, 2.00 equiv.) was then added, and the solution was allowed to stir overnight. Next, benzaldehyde (Sure/Seal™ flask, 63.5 μL, 0.624 mmol, 1.00 equiv.) was added dropwise and the solution was stirred for 6 h. (Theoretically, this corresponds to 1.20 equiv. of vinylborane relative to the alkyl bromide.)

Cross-coupling. An undried flask **B** was charged with Cs<sub>2</sub>CO<sub>3</sub> (610 mg, 1.87 mmol, 3.00 equiv.), and the flask was evacuated and backfilled with dry nitrogen gas. PCy<sub>3</sub>-Pd-G4 (16.6 mg, 0.0250 mmol, 4.00 mol%), HPCy<sub>3</sub>BF<sub>4</sub> (9.20 mg, 0.0250 mmol, 4.00 mol%) and benzyl (6-bromohexyl)carbamate (163 mg, 0.520 mmol, 1.00 equiv.) were quickly added, and then the flask was again evacuated and backfilled with dry nitrogen gas (3x). The resulting solution from flask **A** was then added to the flask **B** containing the catalyst system and base to initiate the reaction. The suspension was stirred rapidly overnight and then filtered through a plug of silica gel. The plug

was washed thoroughly with Et<sub>2</sub>O, and the filtrate was concentrated *in vacuo*. The crude product was triturated with heptane (~3 mL) and then purified by flash column chromatography (SiO<sub>2</sub>, 0 → 30% EtOAc in heptane) to give product **12** (173 mg, 0.437 mmol, 84%). R<sub>f</sub>(30% EtOAc in heptane) = 0.26. <sup>1</sup>H NMR (400 MHz, CDCl<sub>3</sub>) δ 7.96 (d, *J* = 8.4 Hz, 2H), 7.40 – 7.28 (m, 7H), 6.45 – 6.29 (m, 2H), 5.09 (s, 2H), 4.72 (s, 1H), 3.90 (s, 3H), 3.20 (q, *J* = 6.7 Hz, 2H), 2.28 – 2.14 (m, 2H), 1.56 – 1.43 (m, 4H), 1.41 – 1.28 (m, 4H); <sup>13</sup>C NMR (101 MHz, CDCl<sub>3</sub>) δ 167.2, 156.5, 142.5, 136.8, 134.1, 130.0, 129.3, 128.7, 128.4, 128.2, 125.9, 66.7, 52.1, 41.2, 33.2, 30.1, 29.2, 29.0, 26.7. HRESIMS *m/z* 418.1975 [M + Na]<sup>+</sup> (calcd for C<sub>24</sub>H<sub>29</sub>NNaO<sub>4</sub>, 418.1989).

**Benzyl (E)-(8-(4-methoxyphenyl)oct-7-en-1-yl)carbamate (13)** Method III was employed for hydroboration. A flame-dried flask **A** under nitrogen was charged with 4-ethynylanisole (100 mg, 0.757 mmol, 1.00 equiv.) and azeotropically dried with 2-MeTHF (anhydrous over molecular sieves, 2 x ~0.5 mL). The flask was evacuated and backfilled with dry nitrogen gas (3x). 9-BBN-H (0.5 M in THF, 3.03 mL, 1.51 mmol, 2.00 equiv.) was then added, and the solution was allowed to stir overnight. Next, benzaldehyde (Sure/Seal™ flask, 77.0 μL, 0.757 mmol, 1.00 equiv.) was added dropwise and the solution was stirred for 6 h. (Theoretically, this corresponds to 1.20 equiv. of vinylborane relative to the alkyl bromide.)

Cross-coupling. An undried flask **B** was charged with Cs<sub>2</sub>CO<sub>3</sub> (740 mg, 2.27 mmol, 3.00 equiv.), and the flask was evacuated and backfilled with dry nitrogen gas. PCy<sub>3</sub>-Pd-G4 (20.1 mg, 0.0303 mmol, 4.00 mol%), HPCy<sub>3</sub>BF<sub>4</sub> (11.1 mg, 0.0303 mmol, 4.00 mol%) and benzyl (6-bromohexyl)carbamate (198 mg, 0.631 mmol, 1.00 equiv.) were quickly added, and then the flask was again evacuated and backfilled with dry nitrogen gas (3x). The resulting solution from flask **A** was then added to the flask **B** containing the catalyst system and base to initiate the reaction. The suspension was stirred rapidly overnight and then filtered through a plug of silica gel. The plug was washed thoroughly with Et<sub>2</sub>O, and the filtrate was concentrated *in vacuo*. The crude product was purified by flash column chromatography (SiO<sub>2</sub>, 0 → 30% EtOAc in heptane) to give product

**13** (183 mg, 0.498 mmol, 79%).  $R_f$ (30% EtOAc in heptane) = 0.36.  $^1\text{H NMR}$  (400 MHz,  $\text{CDCl}_3$ )  $\delta$  7.39 – 7.26 (m, 7H), 6.87 – 6.79 (m, 2H), 6.36 – 6.26 (m, 1H), 6.06 (dt,  $J = 15.8, 6.9$  Hz, 1H), 5.10 (s, 2H), 4.71 (s, 1H), 3.80 (s, 3H), 3.19 (q,  $J = 6.7$  Hz, 2H), 2.22 – 2.11 (m, 2H), 1.48 (dt,  $J = 22.4, 7.0$  Hz, 4H), 1.40 – 1.27 (m, 4H);  $^{13}\text{C NMR}$  (101 MHz,  $\text{CDCl}_3$ )  $\delta$  158.8, 156.5, 136.8, 130.9, 129.3, 128.9, 128.7, 128.3, 128.2, 127.1, 114.1, 66.7, 55.4, 41.2, 33.0, 30.1, 29.5, 29.0, 26.8. HRESIMS  $m/z$  390.2043  $[\text{M} + \text{Na}]^+$  (calcd for  $\text{C}_{23}\text{H}_{29}\text{NNaO}_3$ , 390.2040).

# $^1\text{H}$ and $^{13}\text{C}$ NMR-spectra

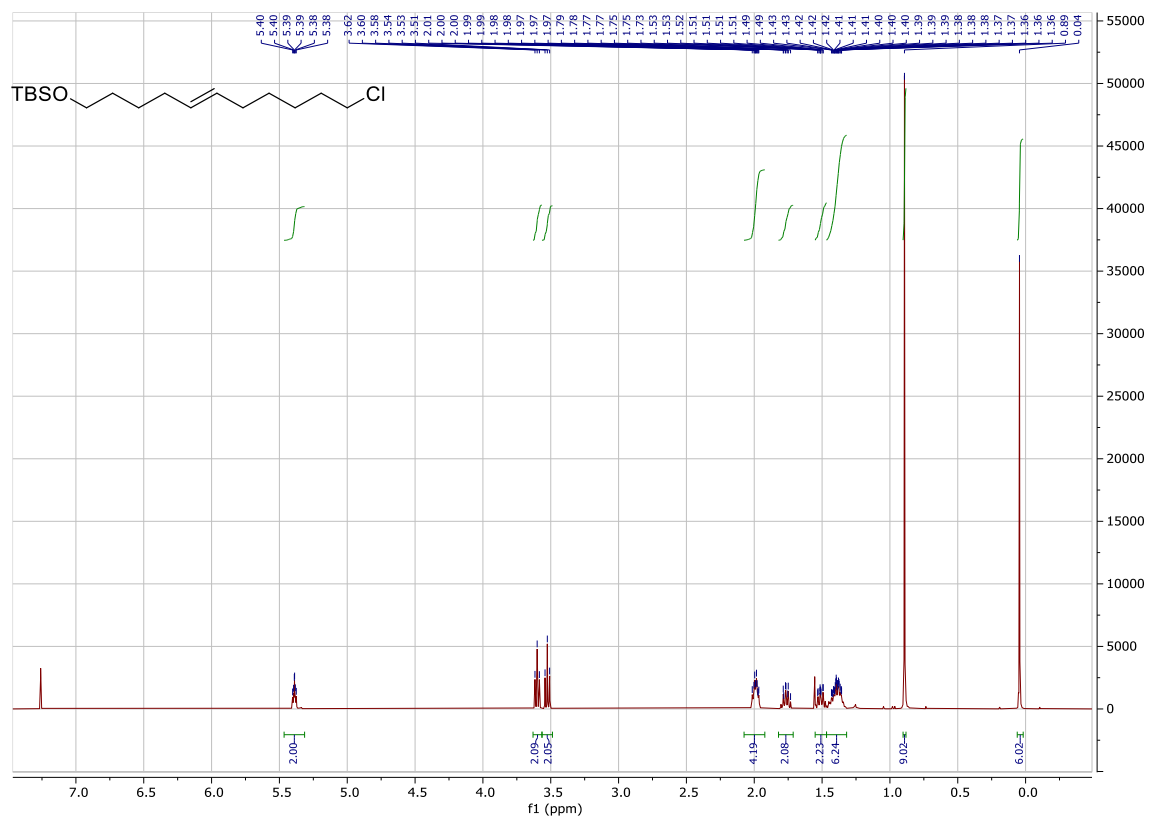

Figure S-1  $^1\text{H}$ -NMR spectrum of compound 1.

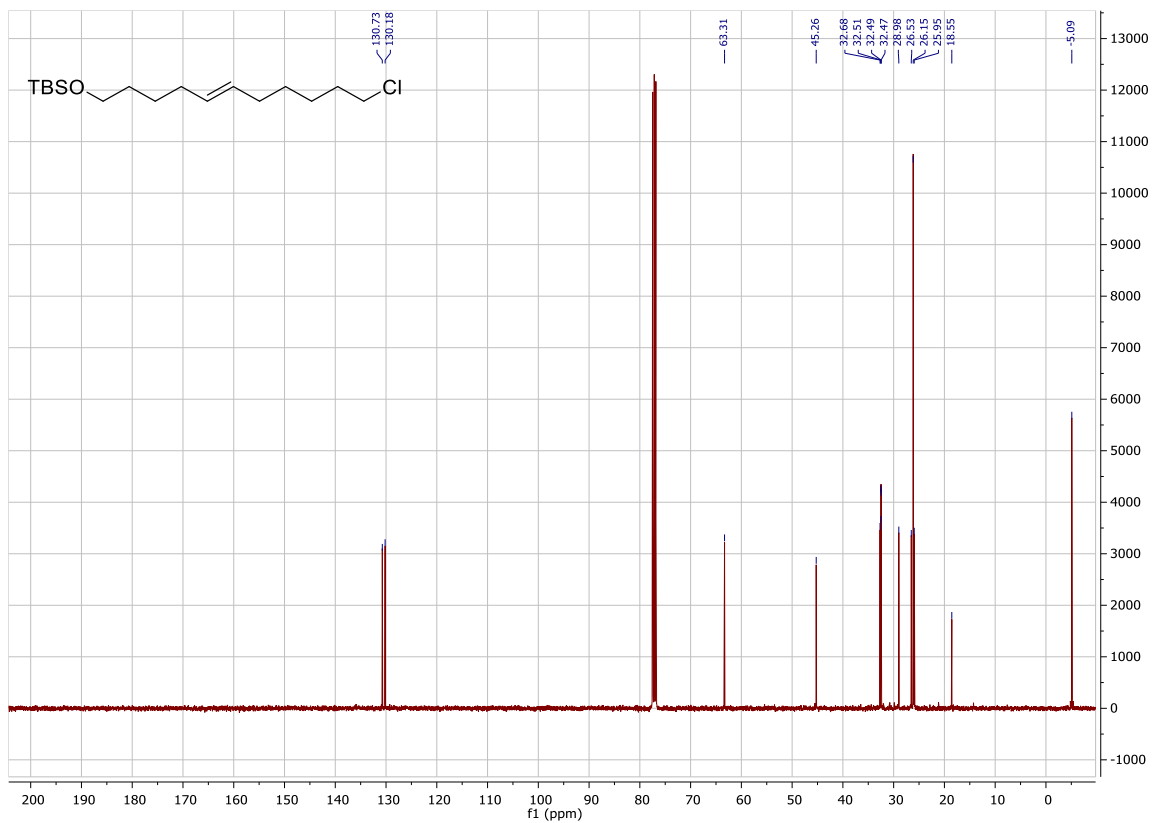

Figure S-2  $^{13}\text{C}$  NMR spectrum of compound 1.

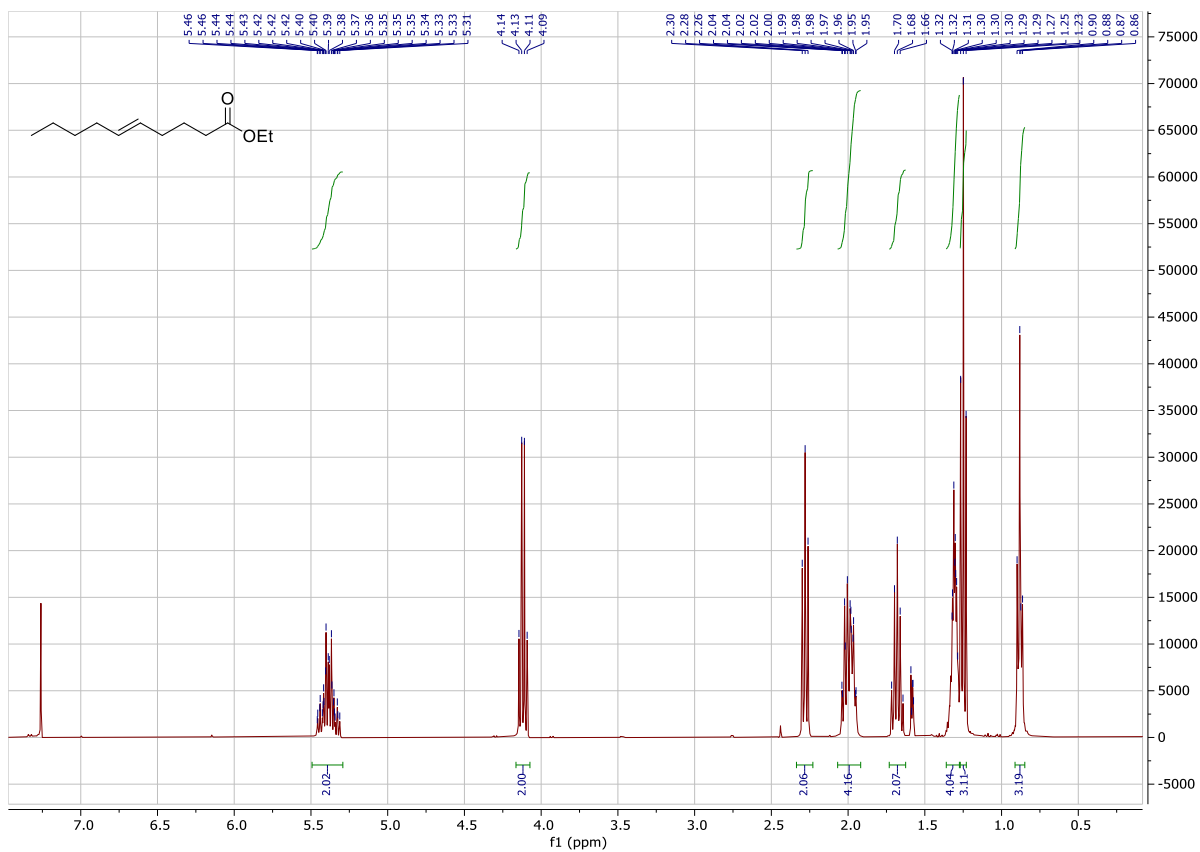

Figure S-3 <sup>1</sup>H-NMR spectrum of compound 2.

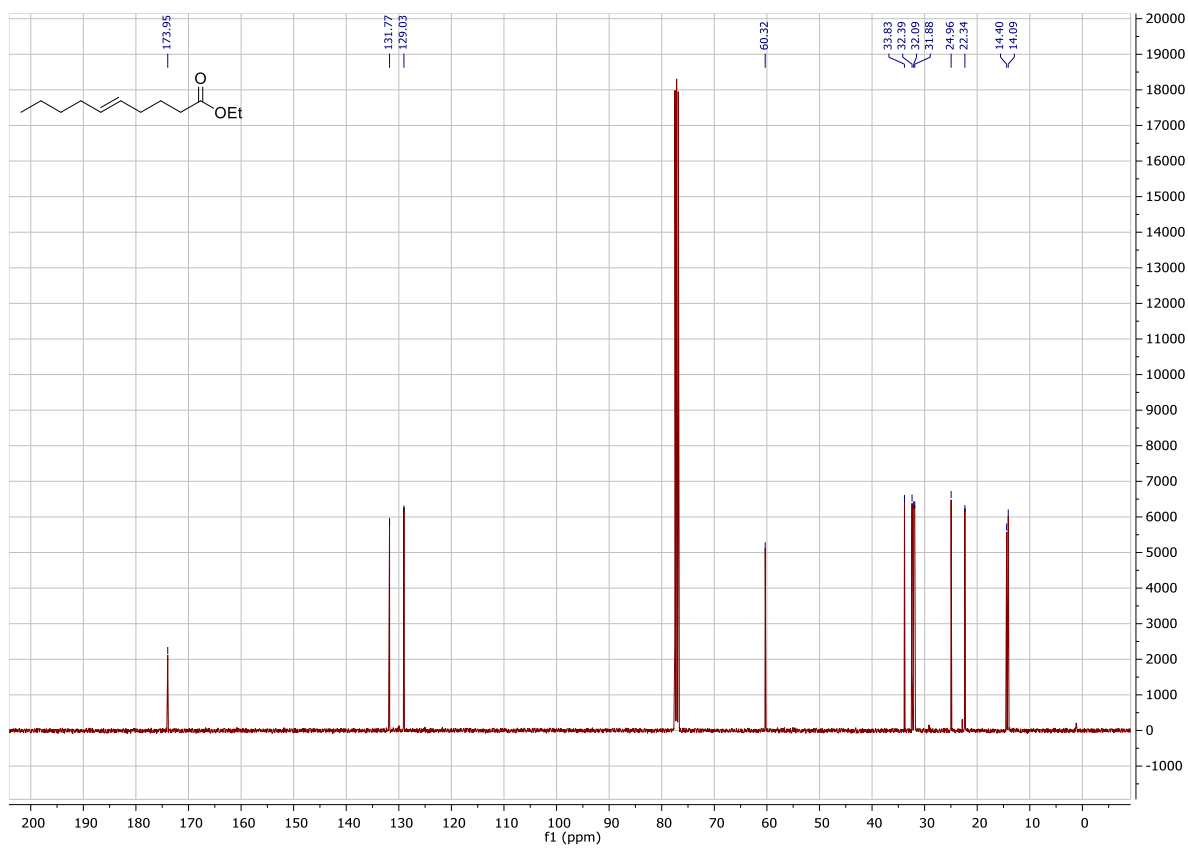

Figure S-4 <sup>13</sup>C NMR spectrum of compound 2.

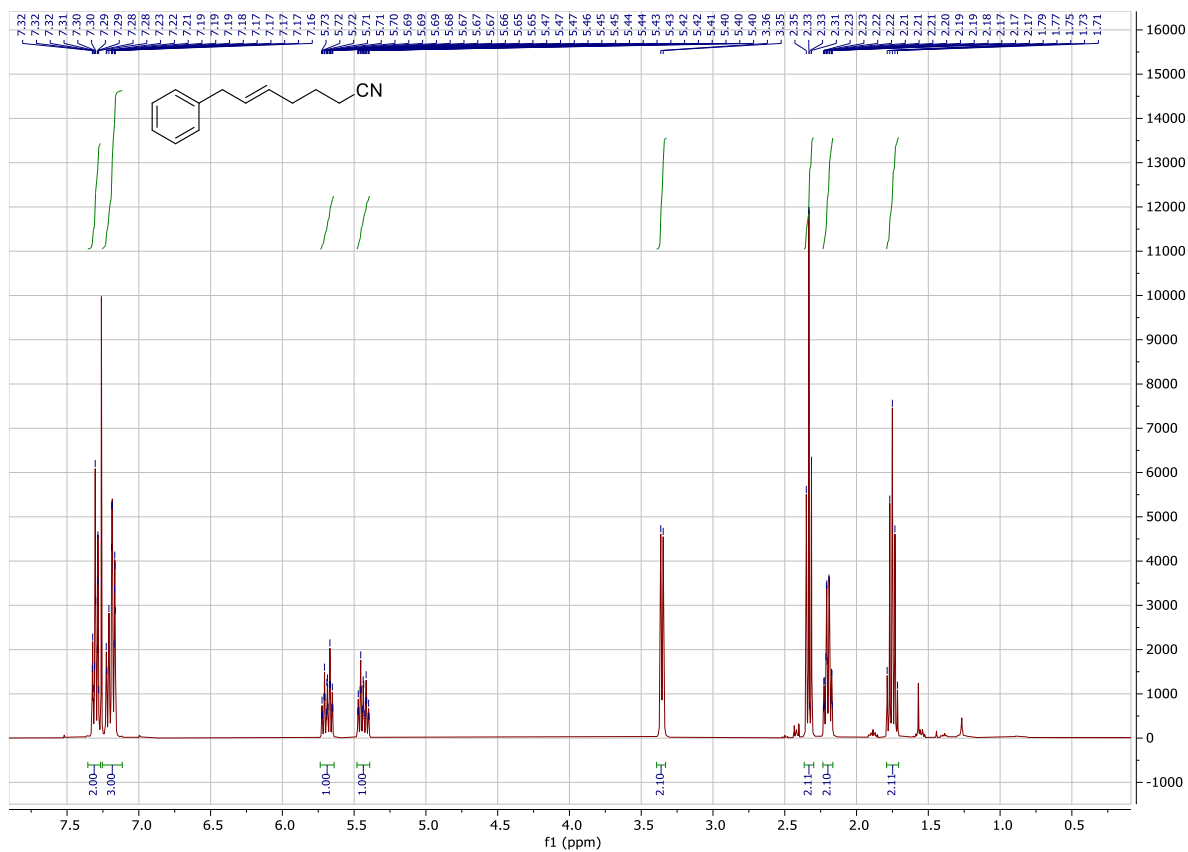

Figure S-5 <sup>1</sup>H-NMR spectrum of compound 3.

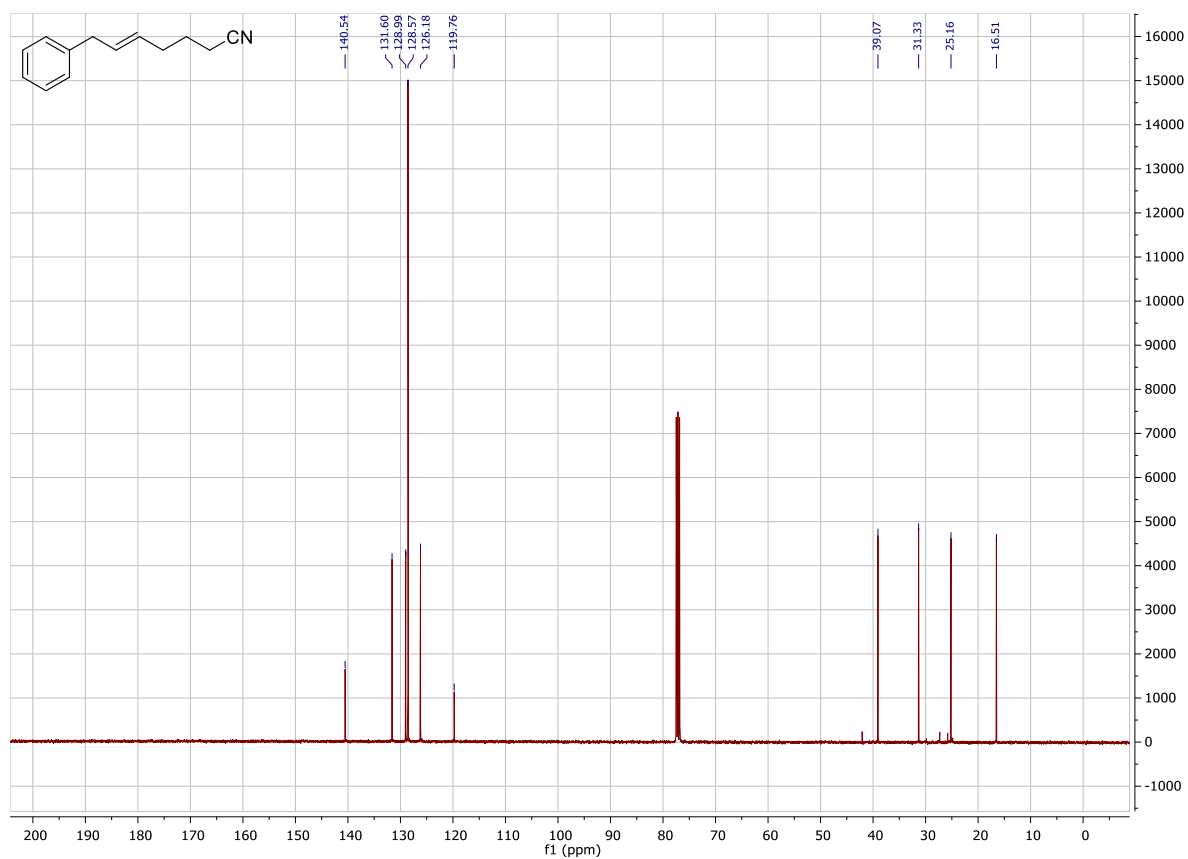

Figure S-6 <sup>13</sup>C NMR spectrum of compound 3.

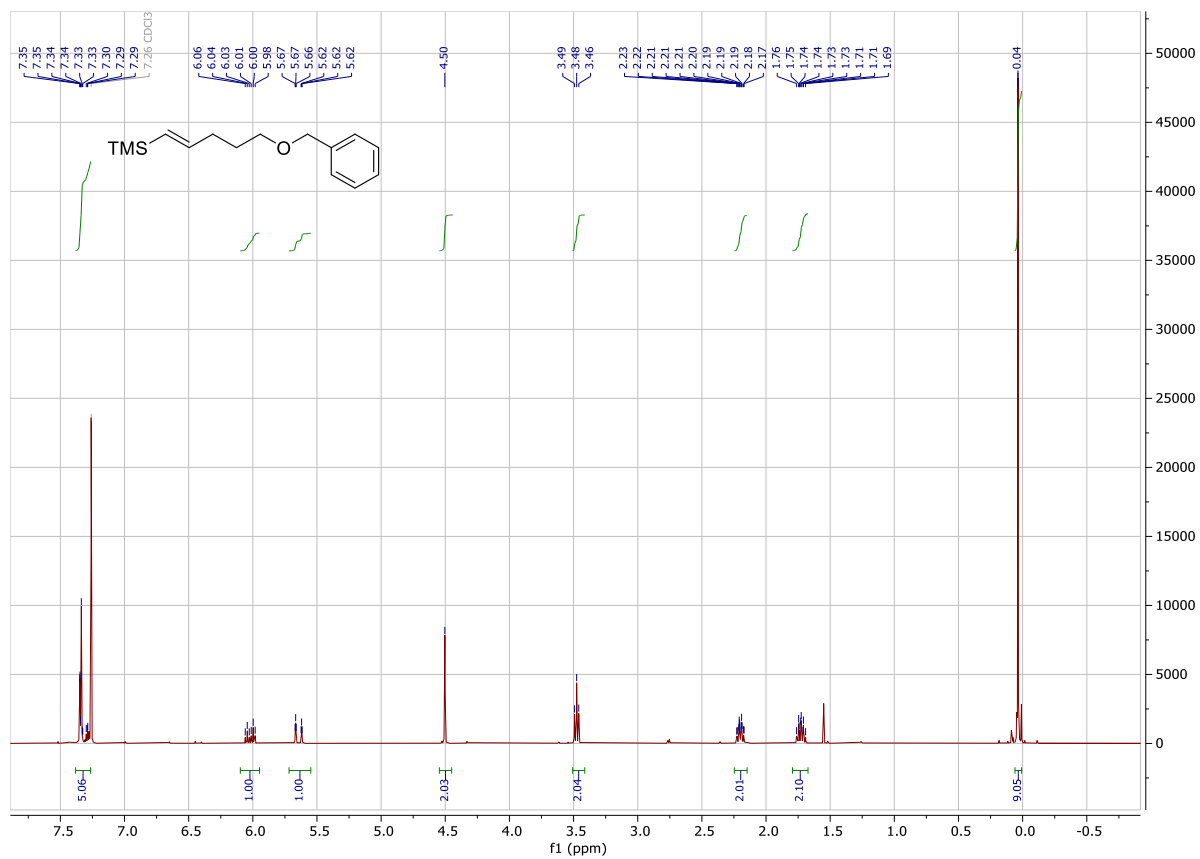

Figure S-7 <sup>1</sup>H-NMR spectrum of compound 4.

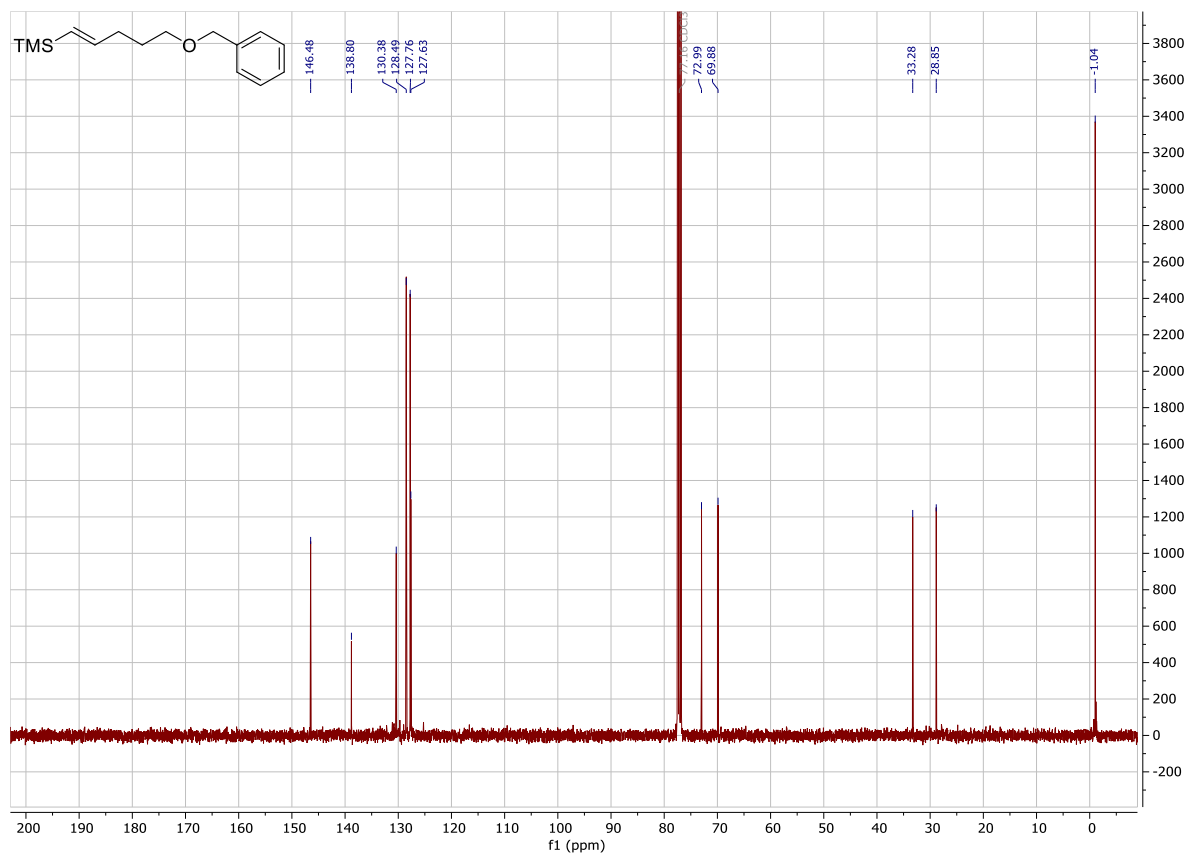

Figure S-8 <sup>13</sup>C NMR spectrum of compound 4.

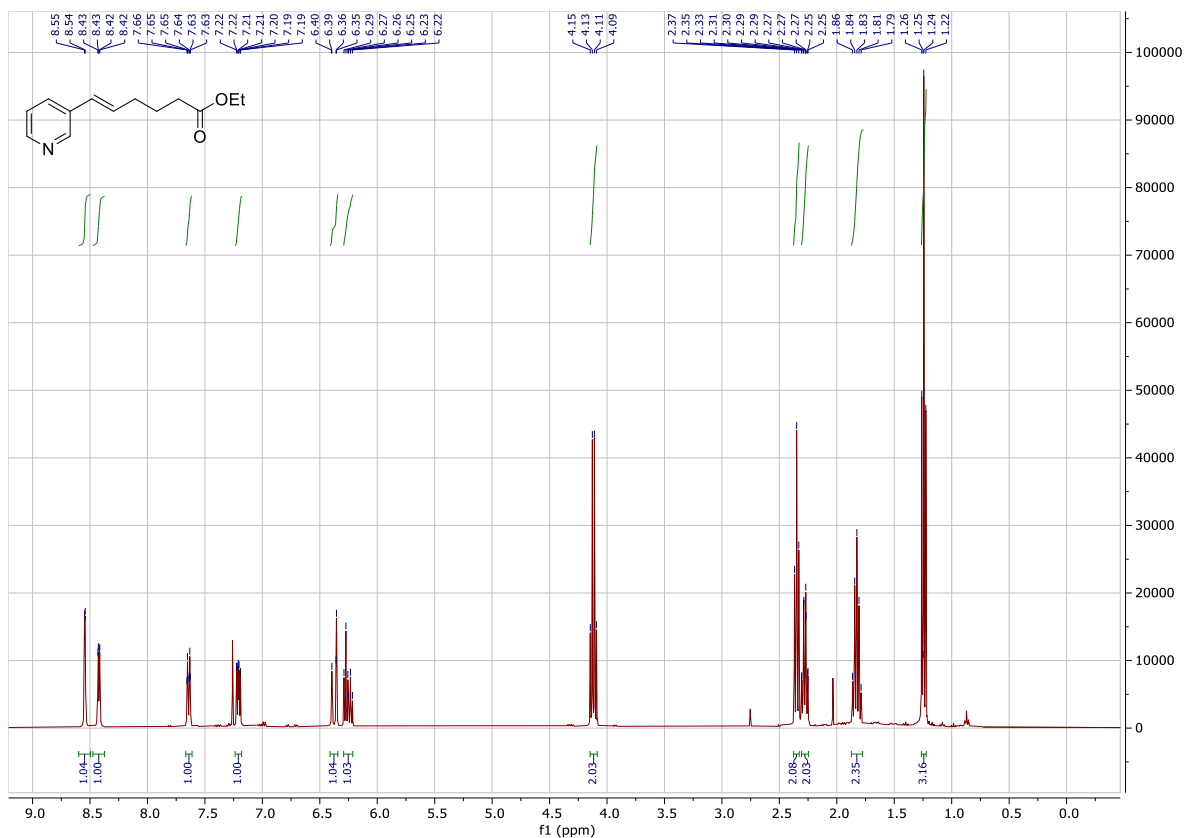

Figure S-9 <sup>1</sup>H-NMR spectrum of compound 5.

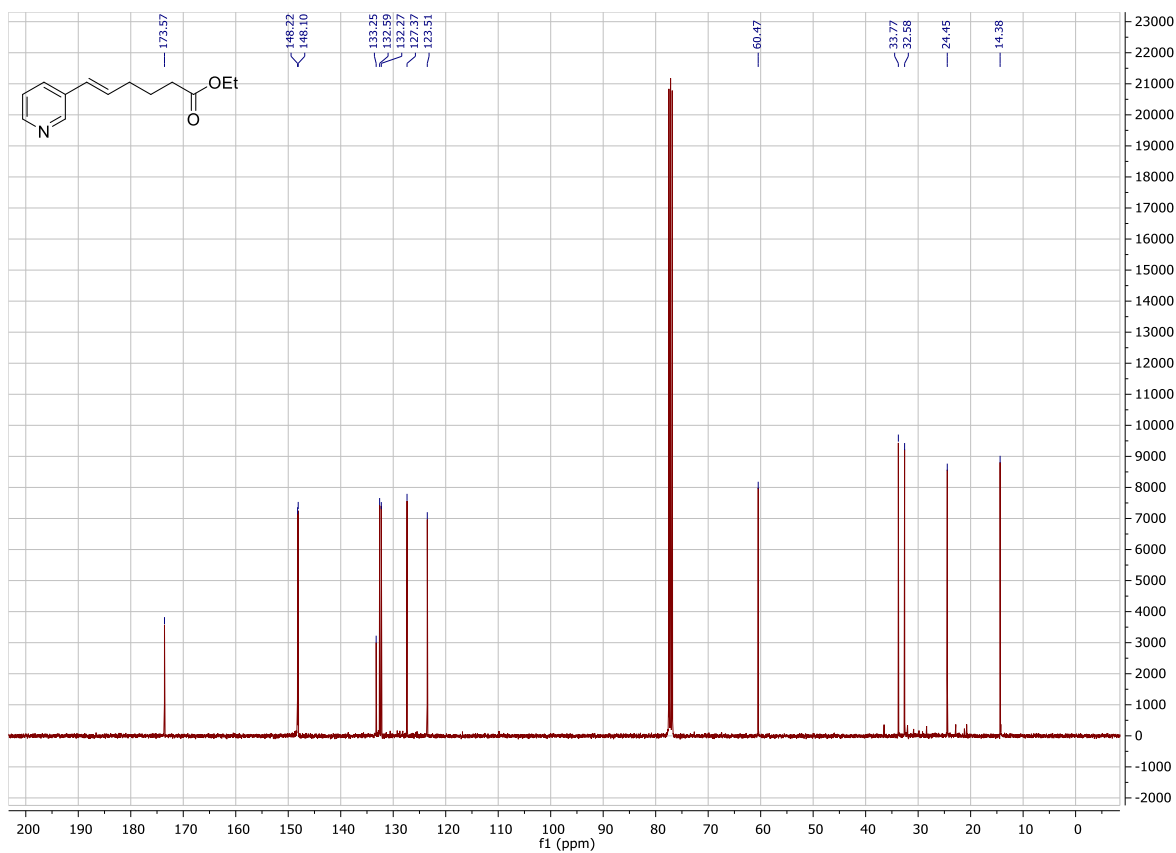

Figure S-10 <sup>13</sup>C NMR spectrum of compound 5.

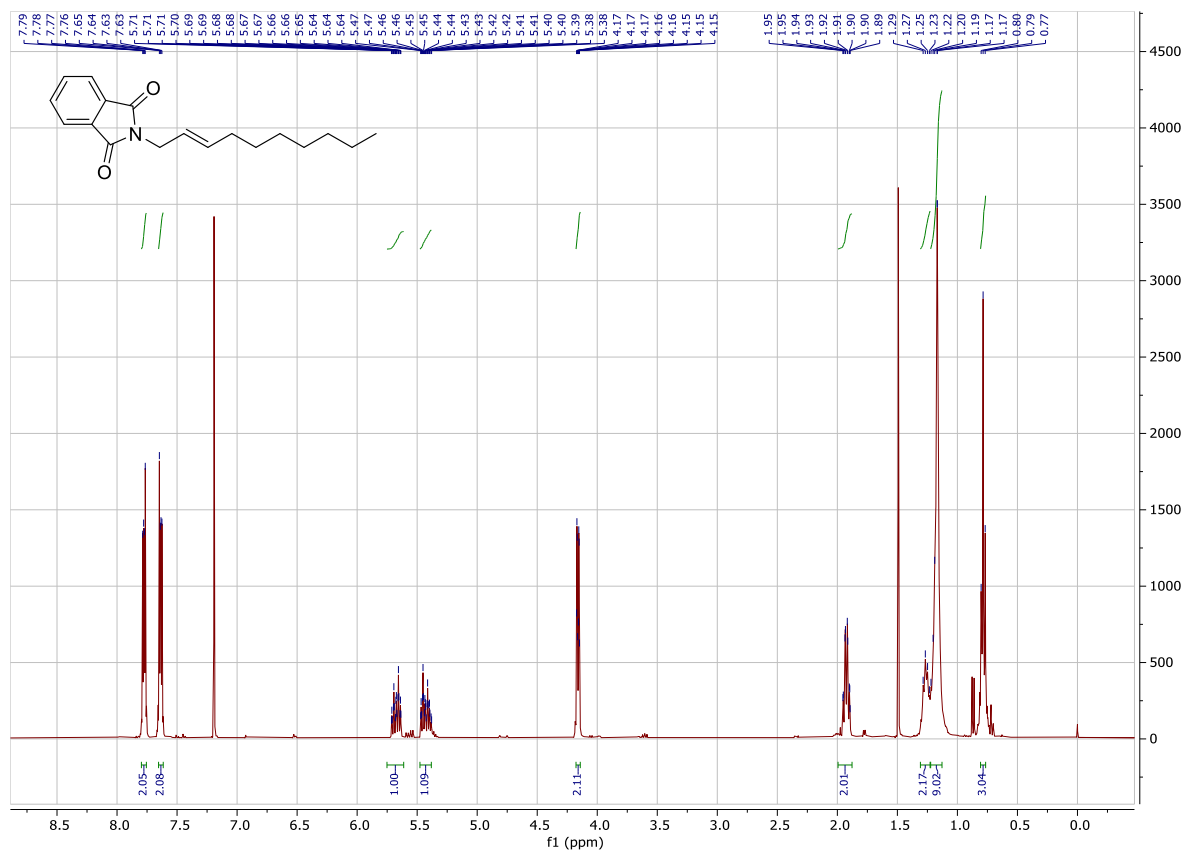

Figure S-11 <sup>1</sup>H-NMR spectrum of compound 6.

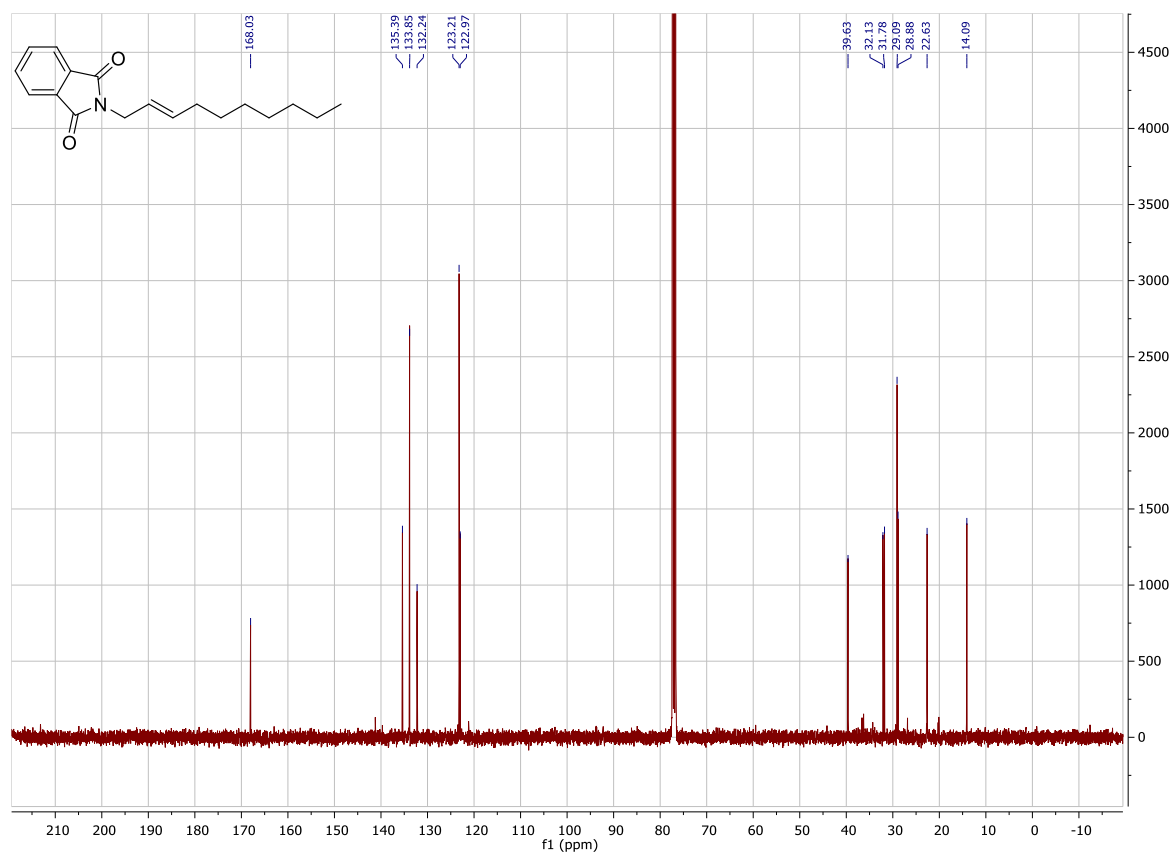

Figure S-12 <sup>13</sup>C NMR spectrum of compound 6.

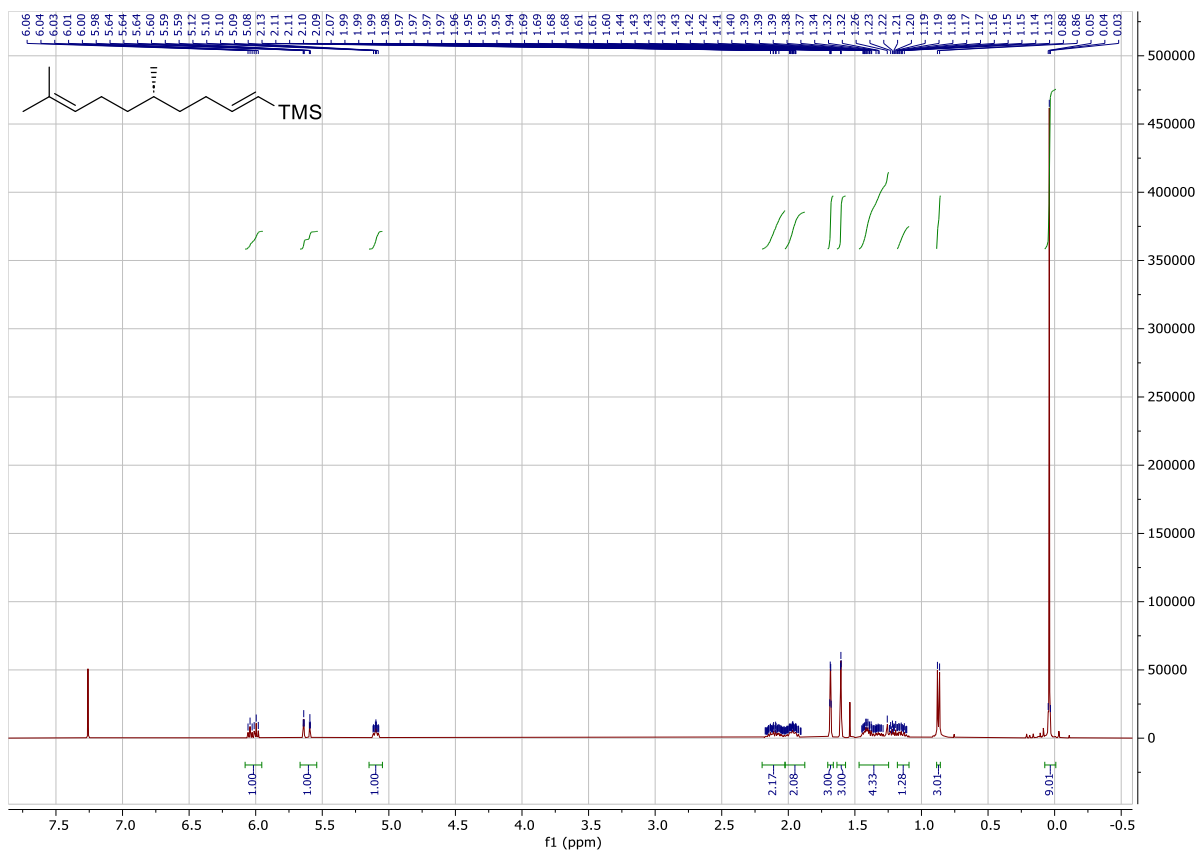

Figure S-13 <sup>1</sup>H-NMR spectrum of compound 7.

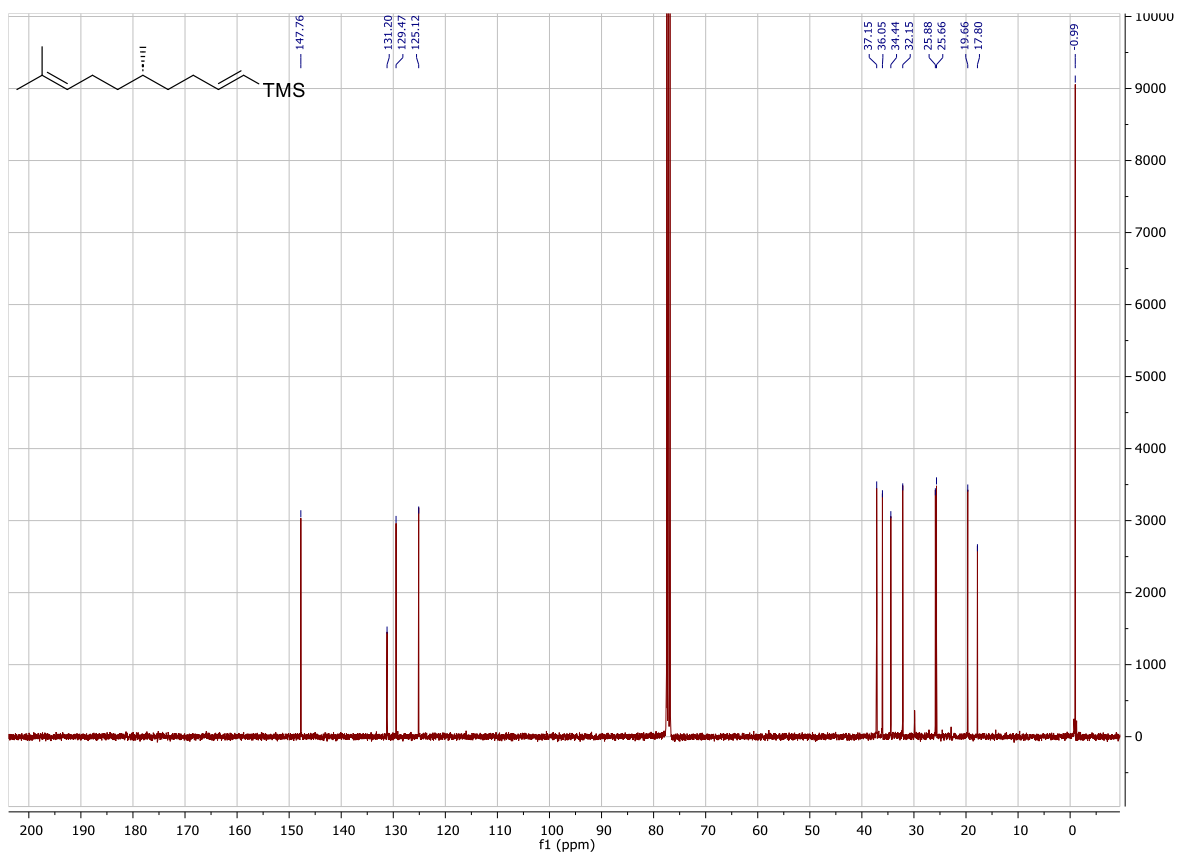

Figure S-14 <sup>13</sup>C-NMR spectrum of compound 7.

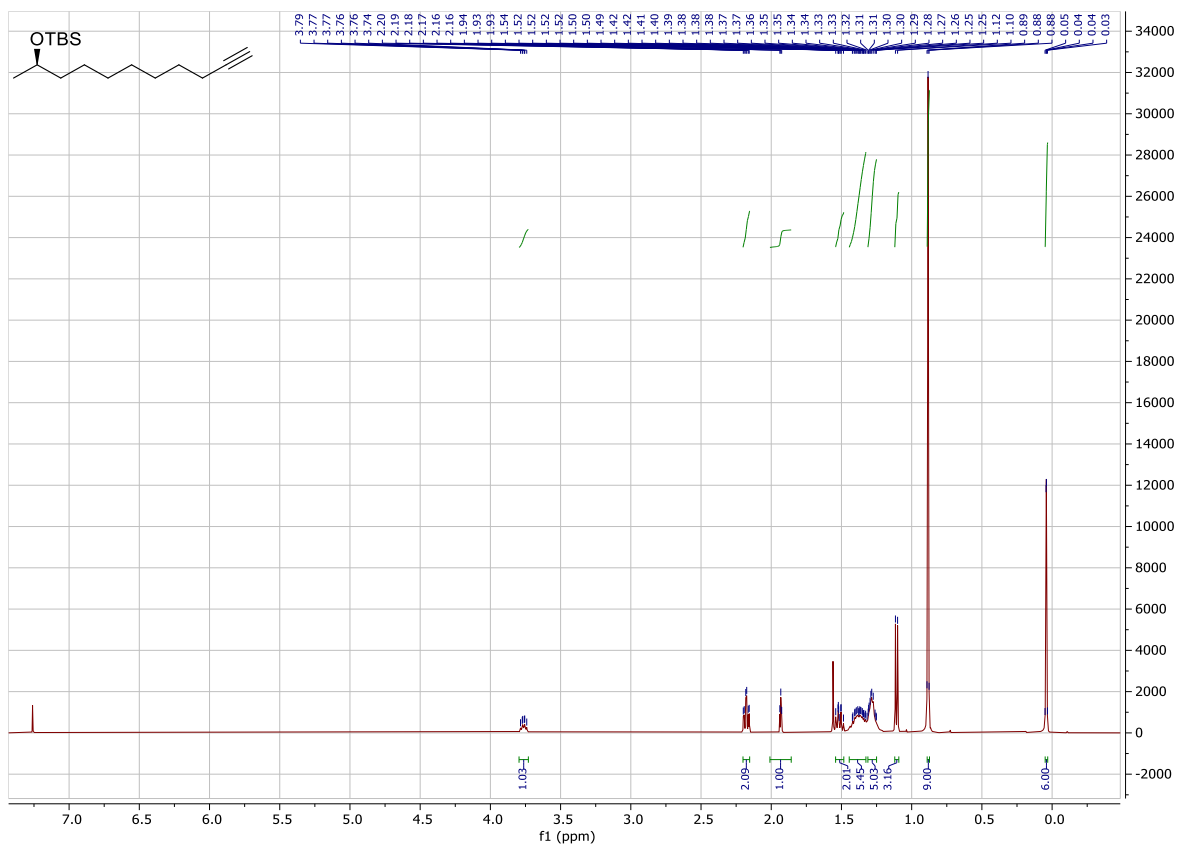

Figure S-15  $^1\text{H}$ -NMR spectrum of compound 8a.

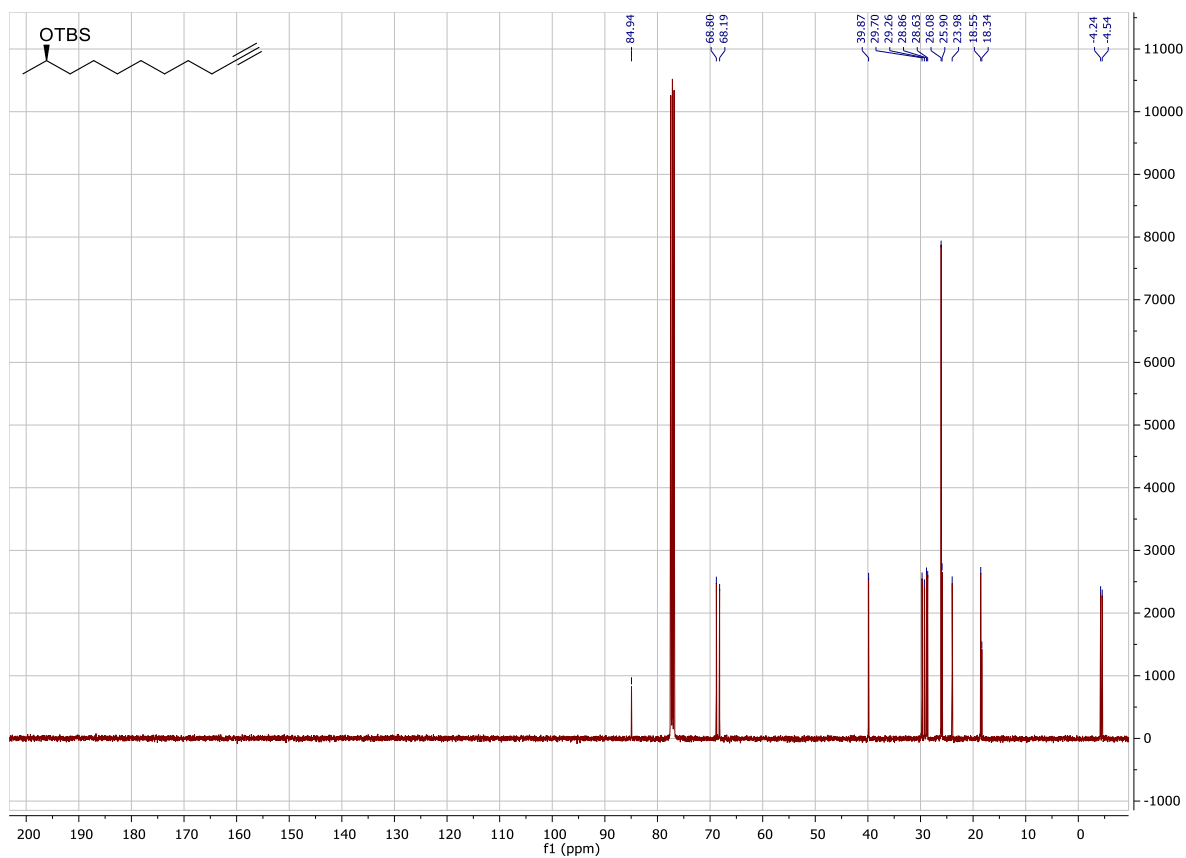

Figure S-16  $^{13}\text{C}$  NMR spectrum of compound 8a.

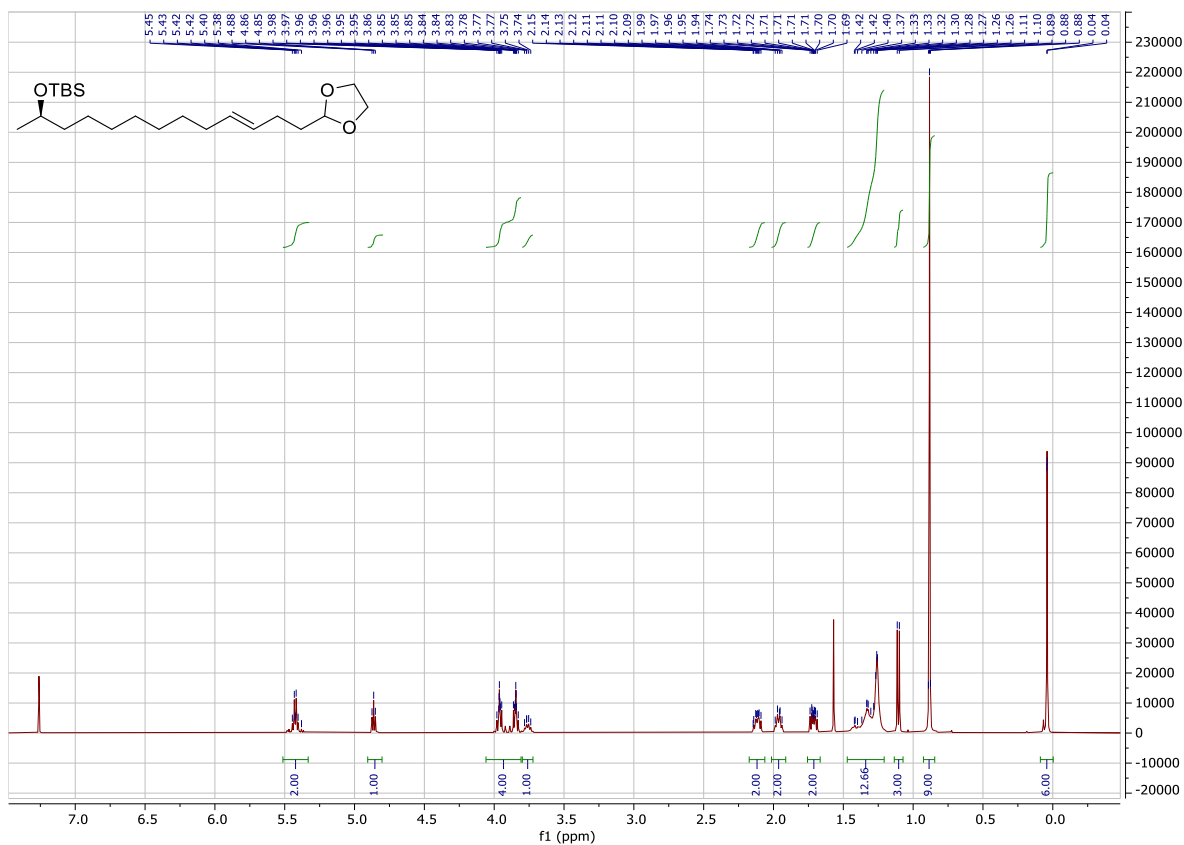

Figure S-17 <sup>1</sup>H-NMR spectrum of compound 8.

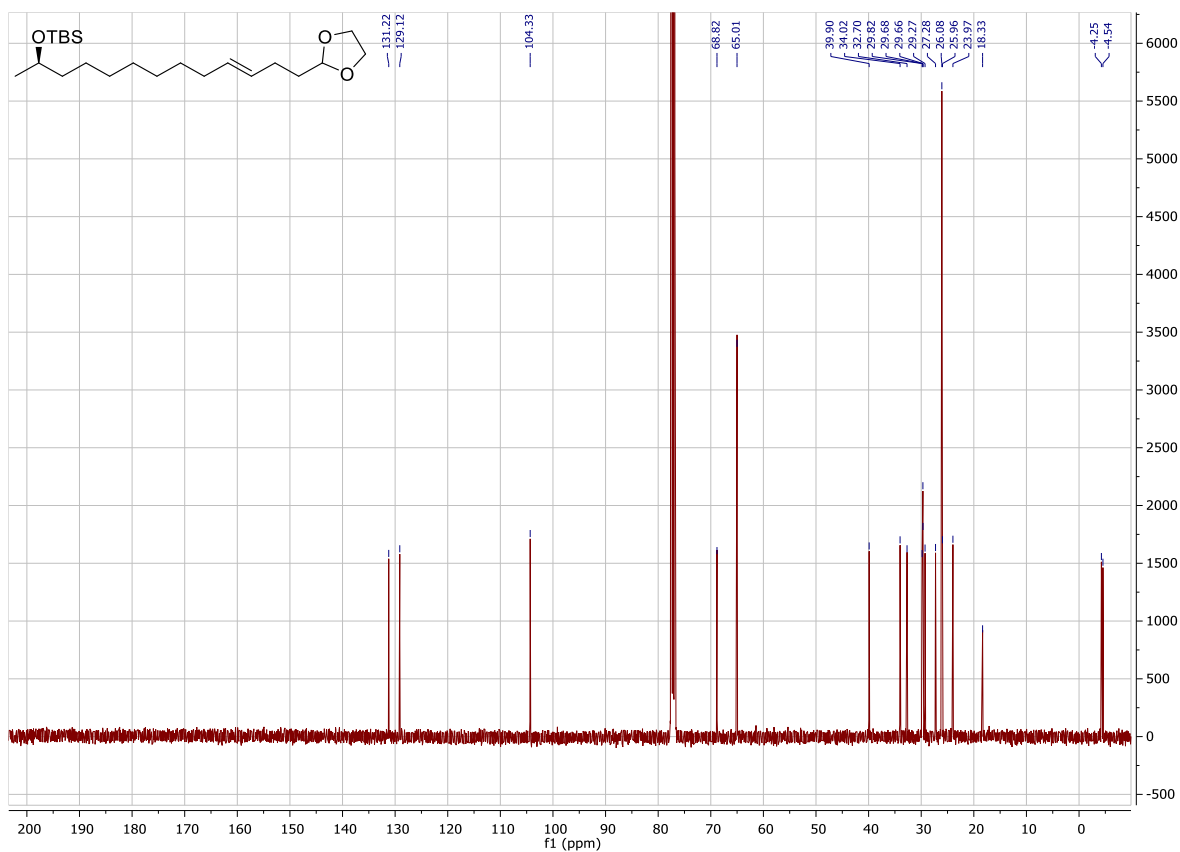

Figure S-18 <sup>13</sup>C NMR spectrum of compound 8.

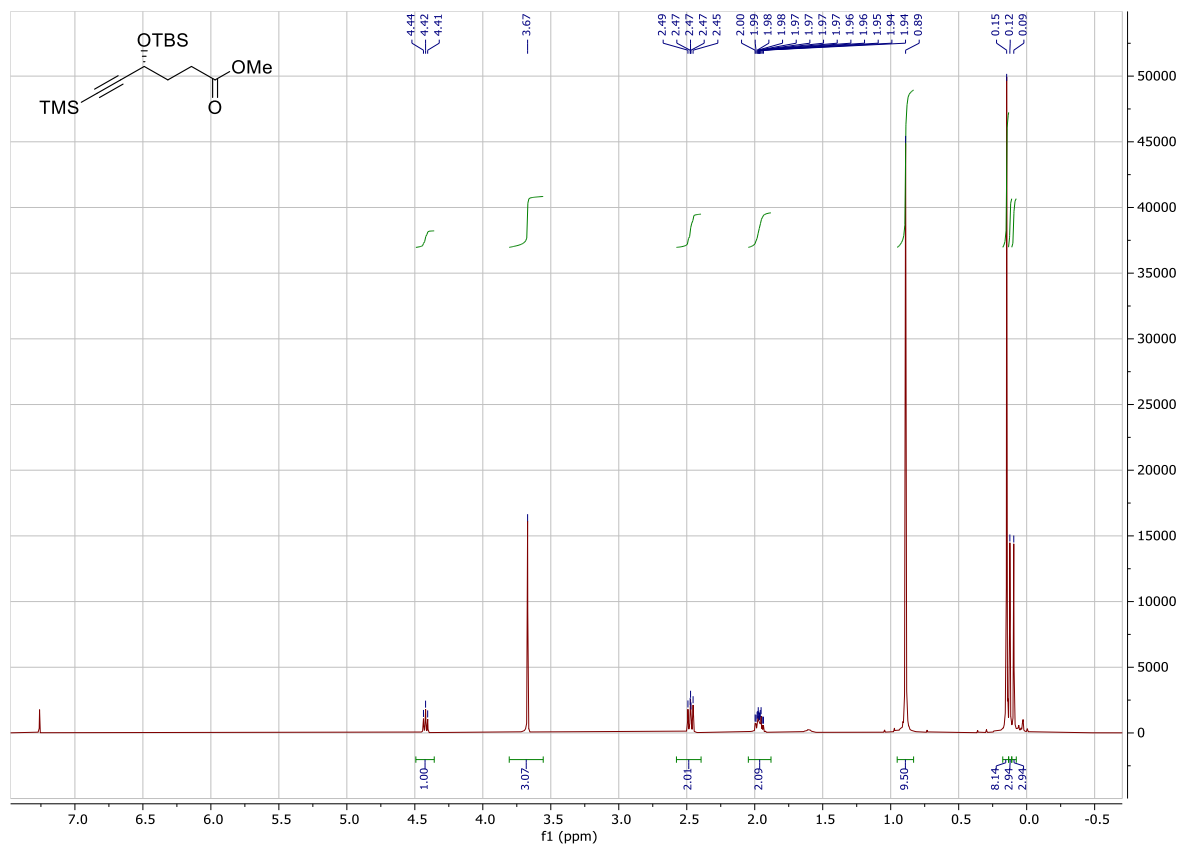

Figure S-19 <sup>1</sup>H-NMR spectrum of compound 9a.

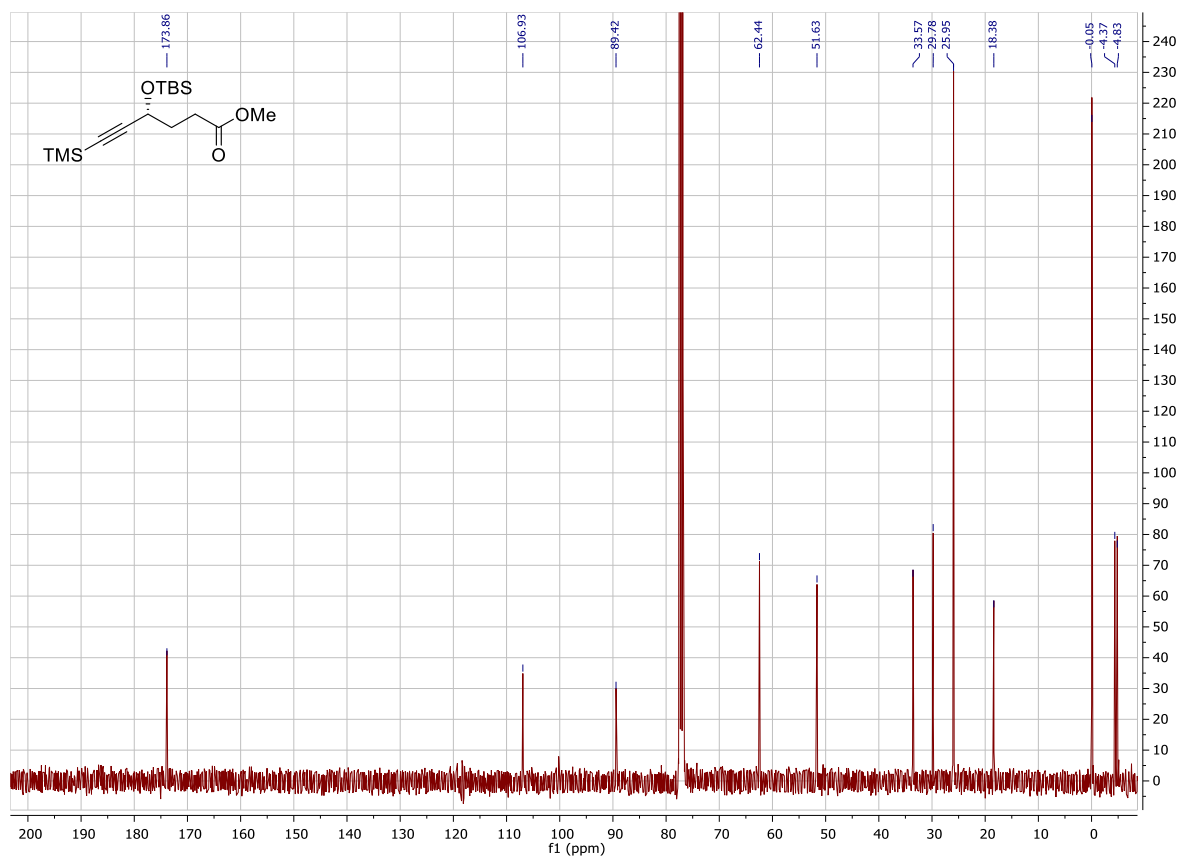

Figure S-20 <sup>13</sup>C NMR spectrum of compound 9a.

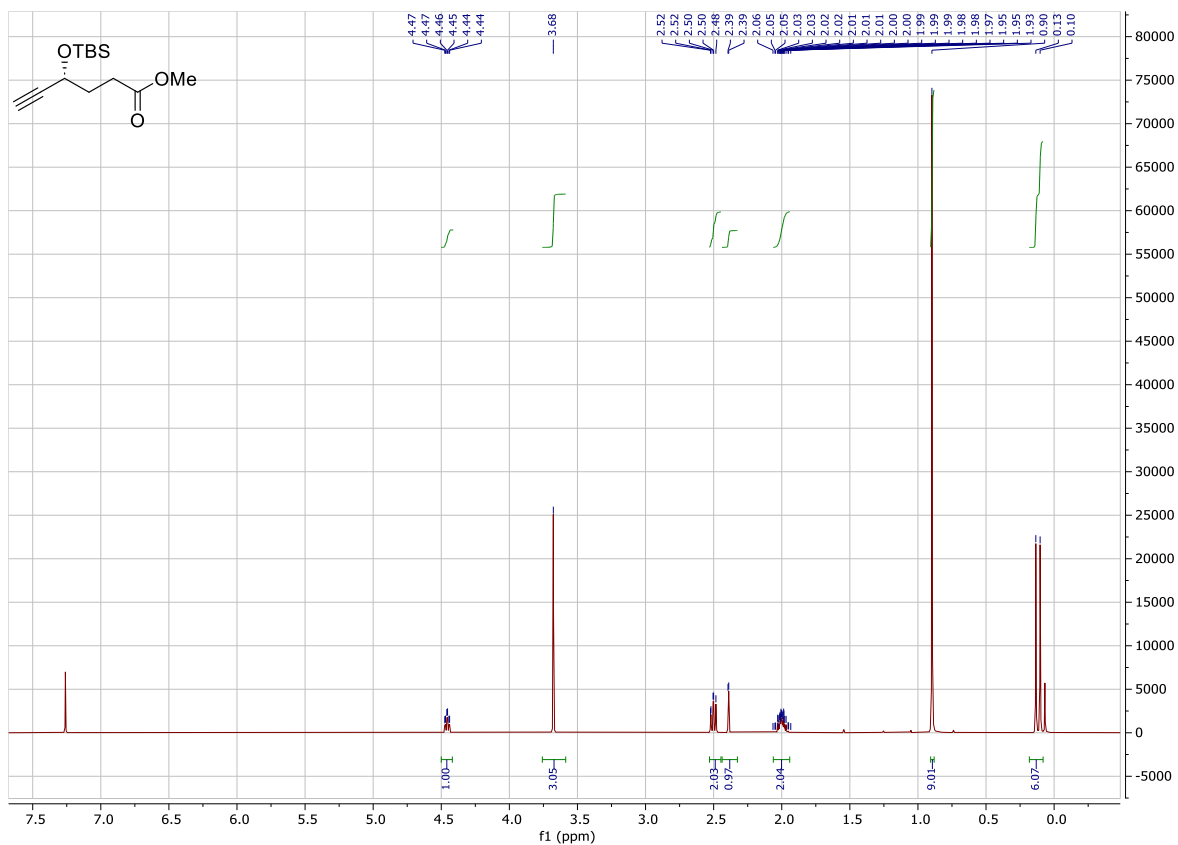

Figure S-21  $^1\text{H-NMR}$  spectrum of compound 9b.

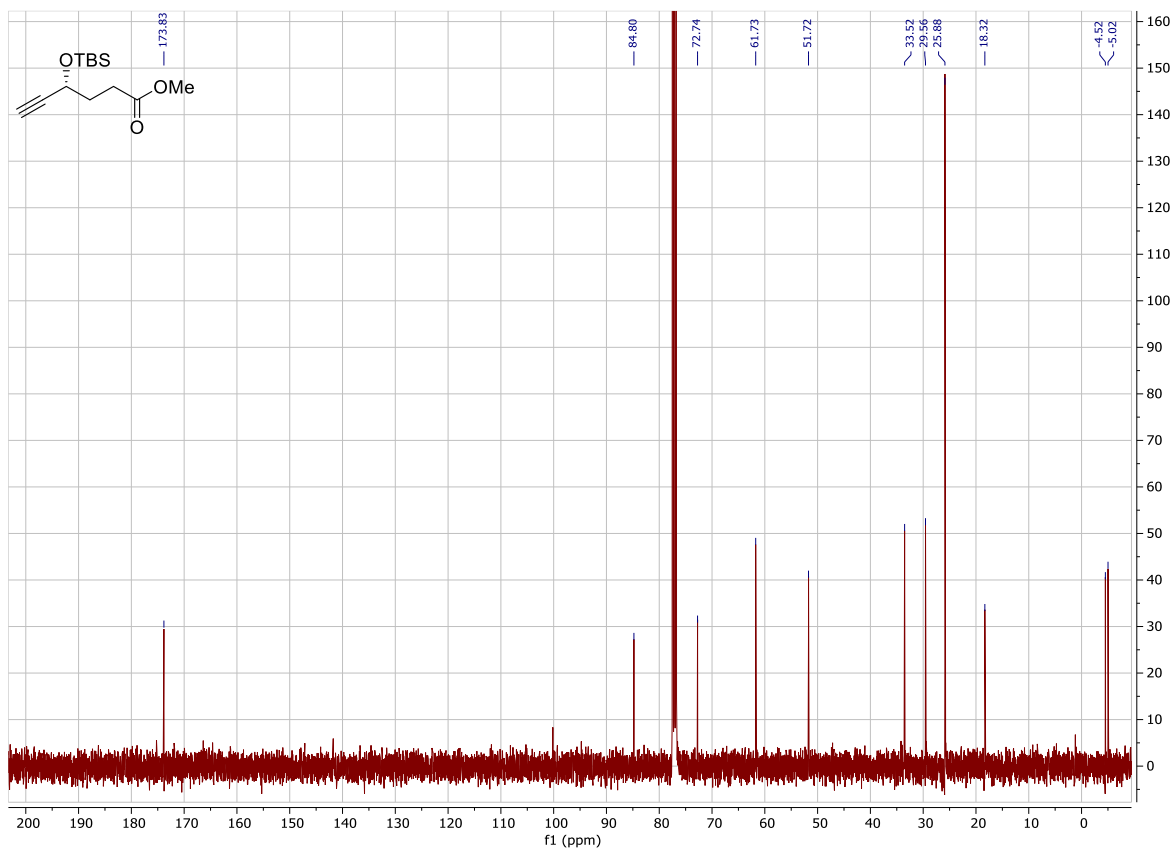

Figure S-22  $^{13}\text{C-NMR}$  spectrum of compound 9b.

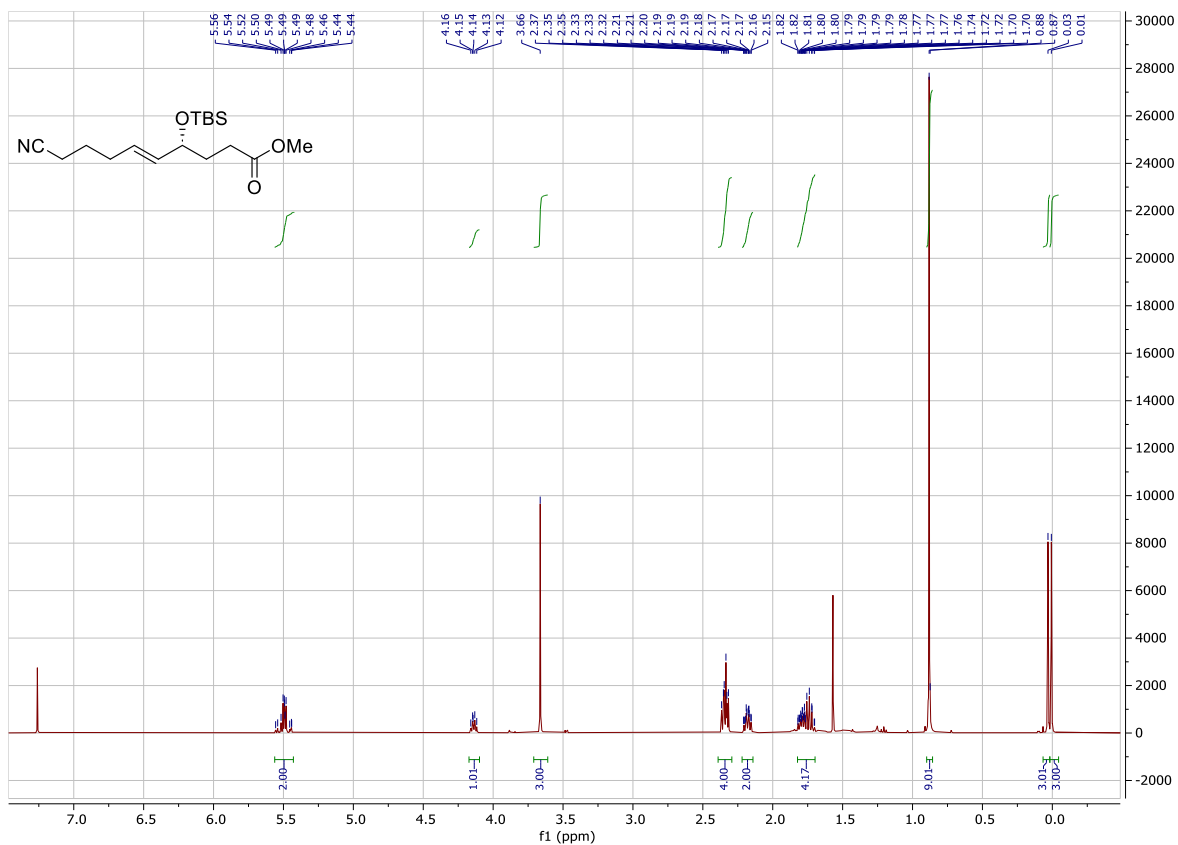

Figure S-23 <sup>1</sup>H-NMR spectrum of compound 9.

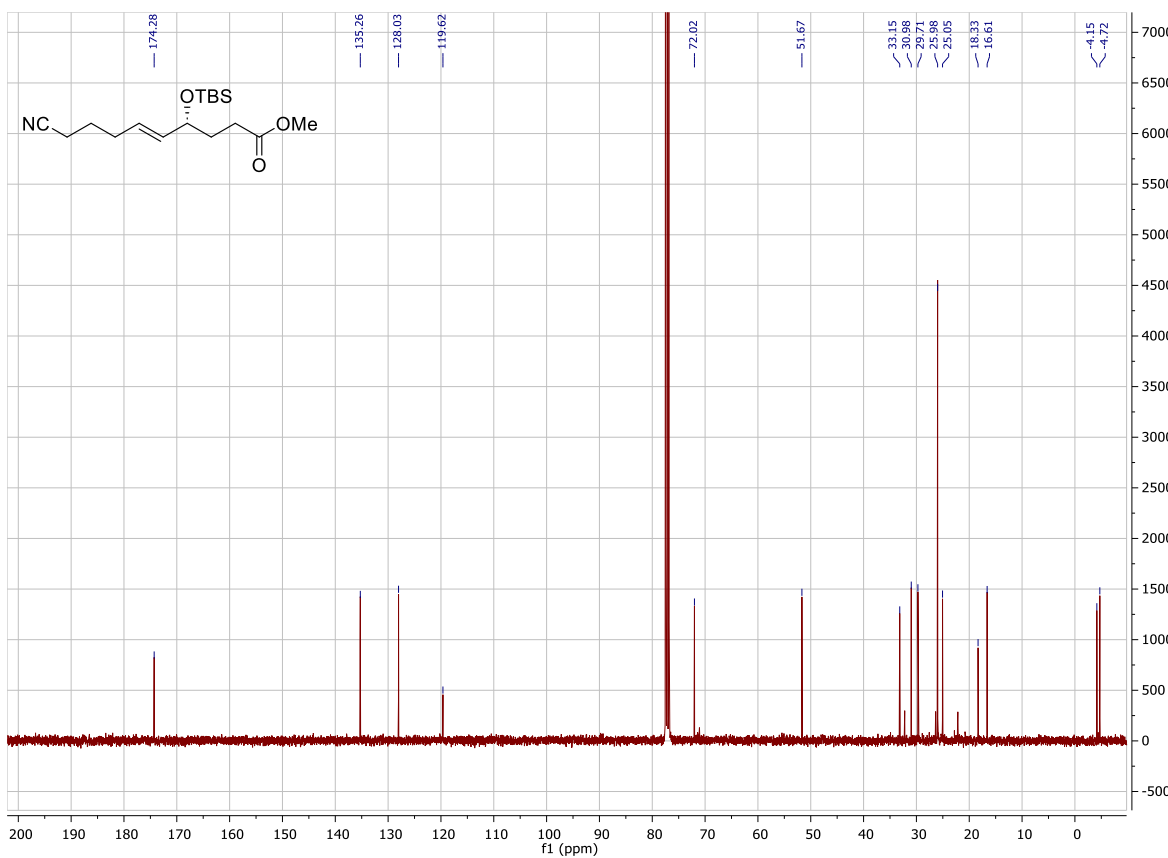

Figure S-24 <sup>13</sup>C NMR spectrum of compound 9.

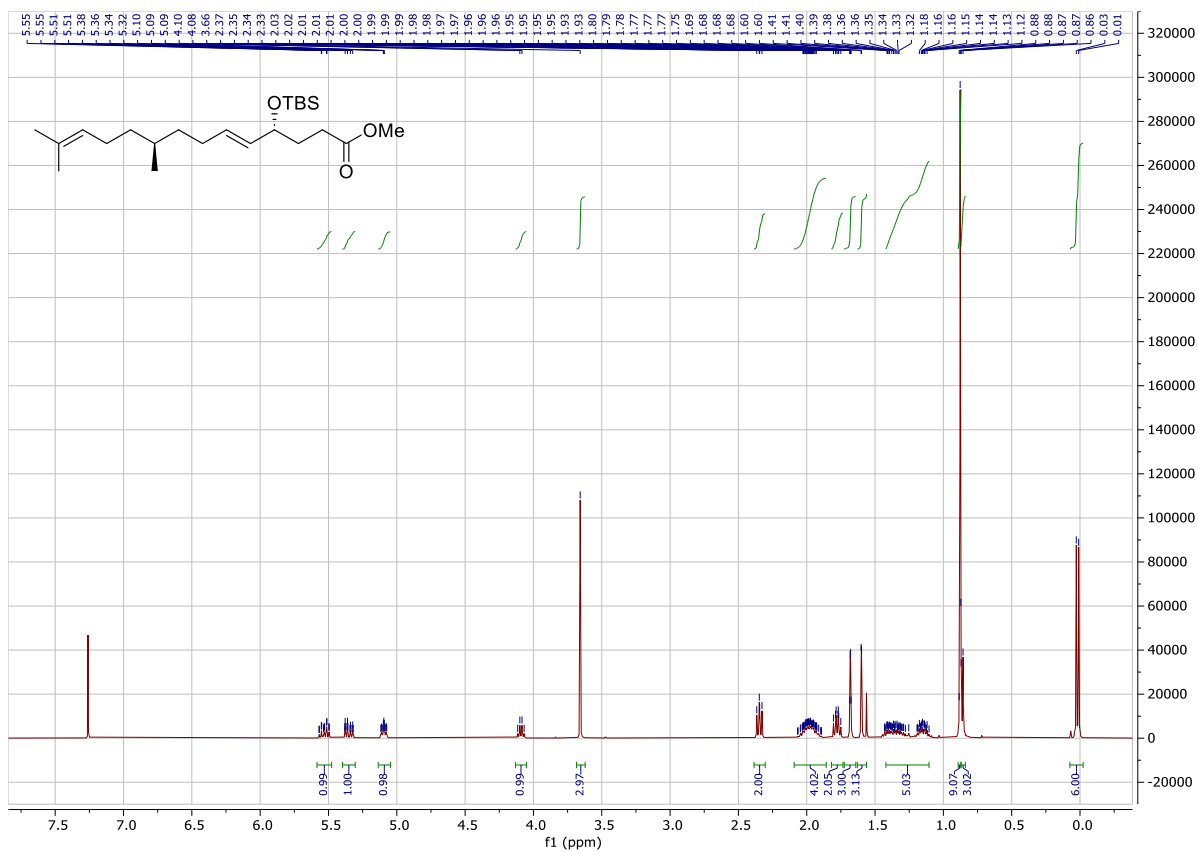

Figure S-25 <sup>1</sup>H-NMR spectrum of compound 10.

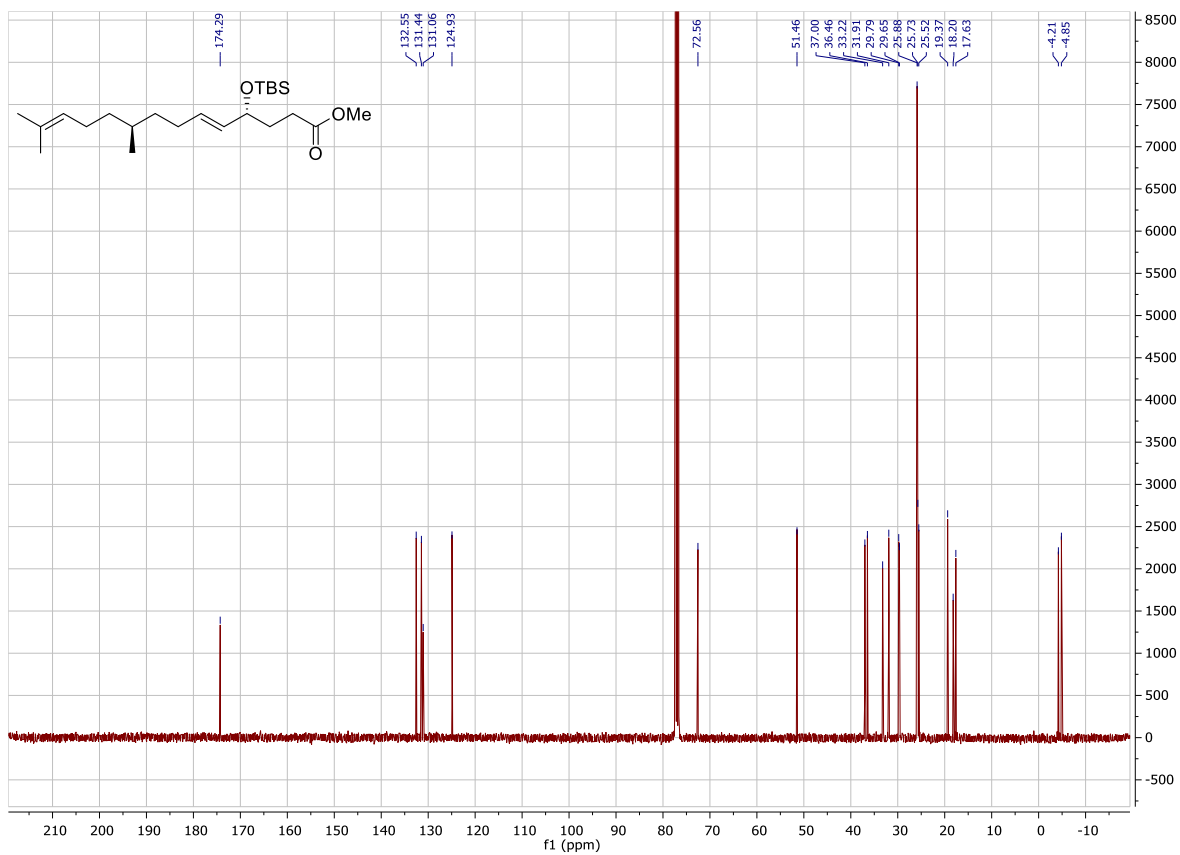

Figure S-26 <sup>13</sup>C NMR spectrum of compound 10.

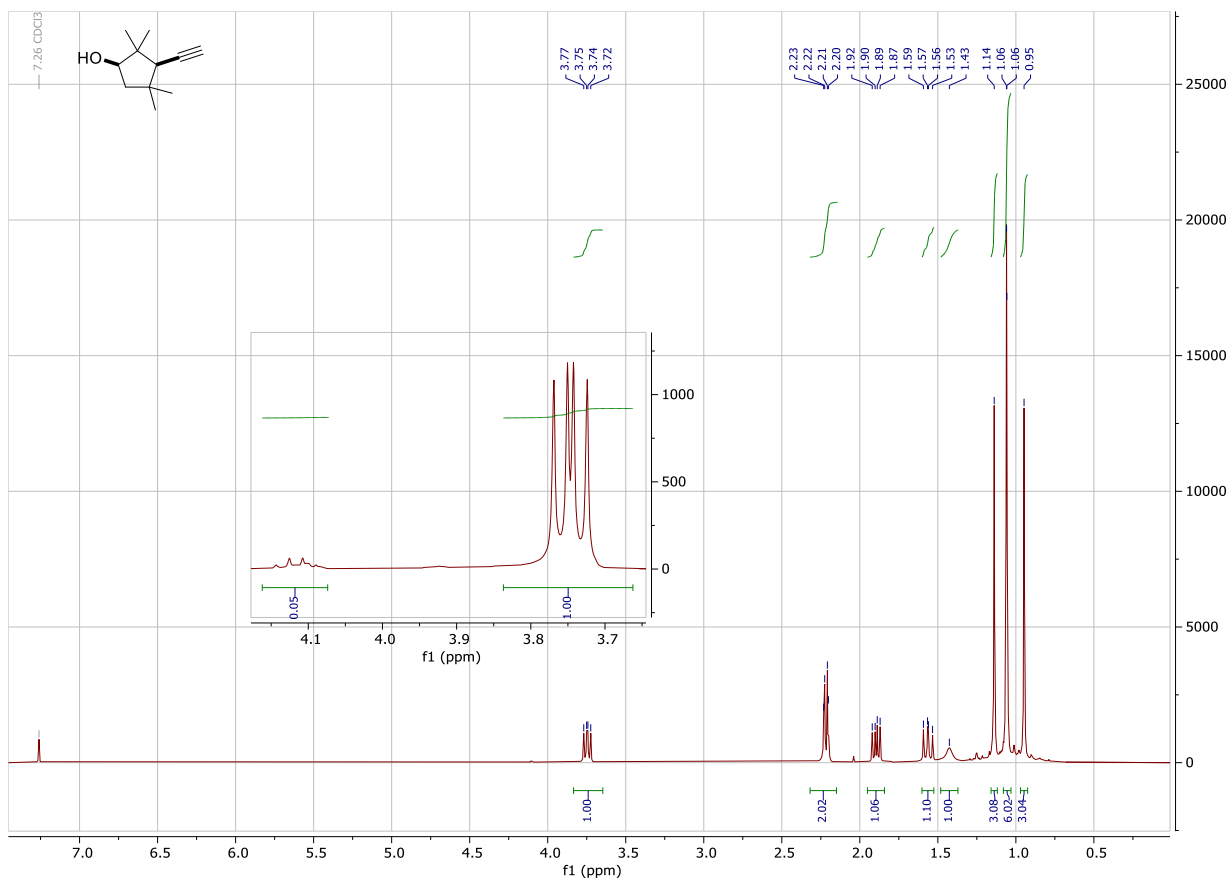

Figure S-27 <sup>1</sup>H-NMR spectrum of compound 11b.

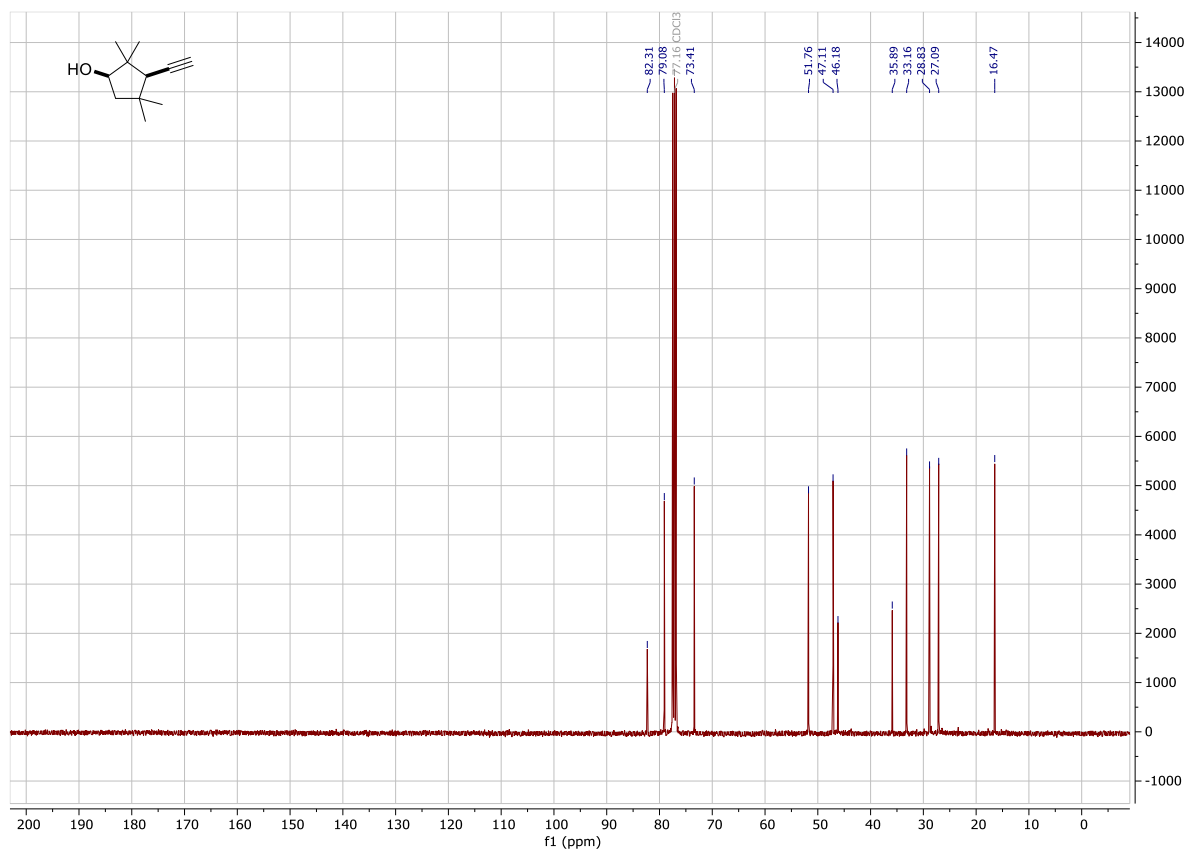

Figure 28 <sup>13</sup>C-NMR spectrum of compound 11b.

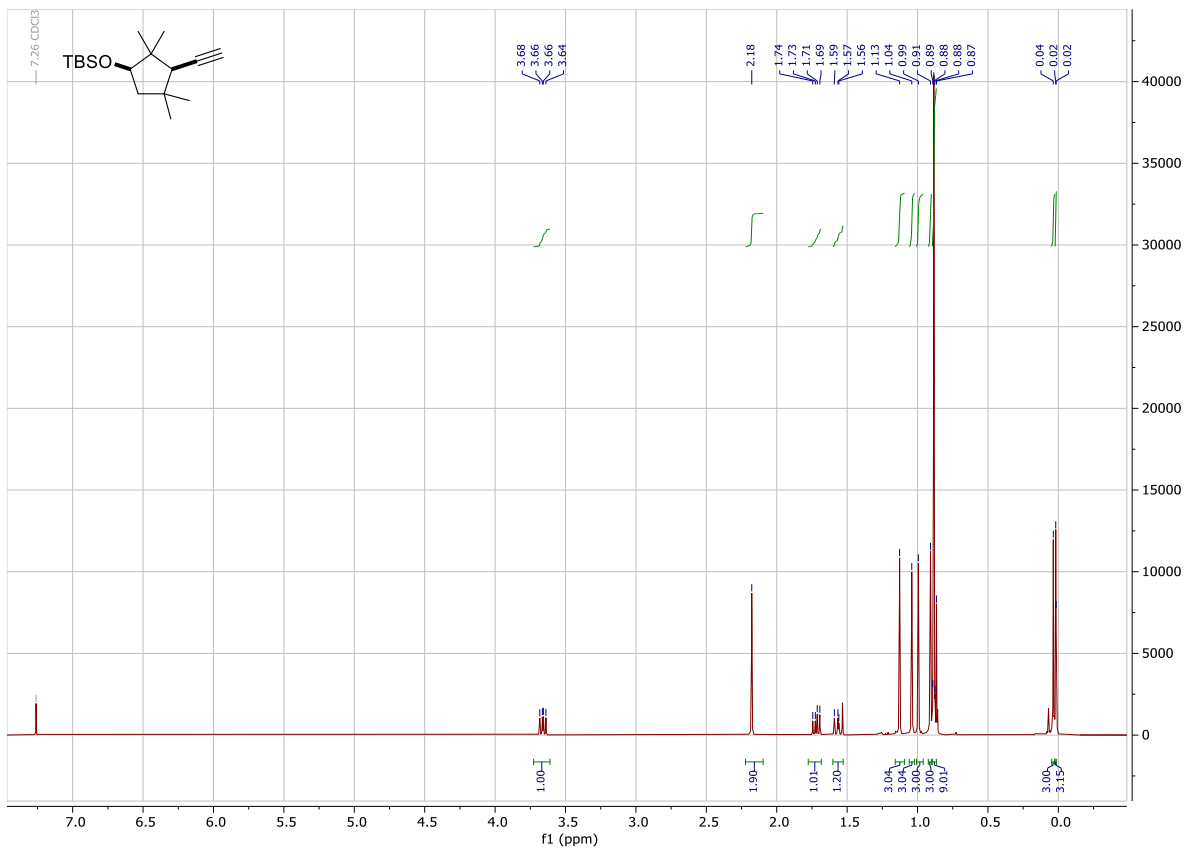

Figure S-29 <sup>1</sup>H-NMR spectrum of compound 11c.

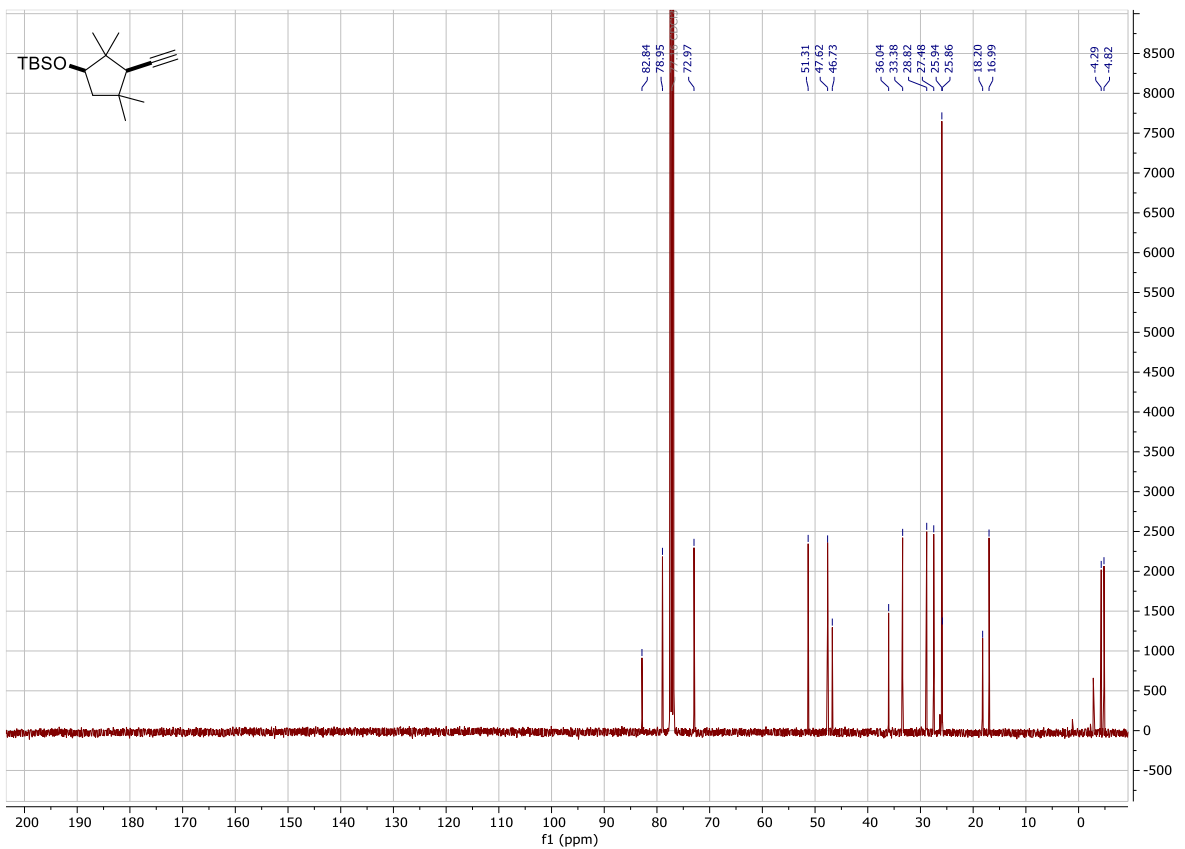

Figure 30 <sup>13</sup>C NMR spectrum of compound 11c.

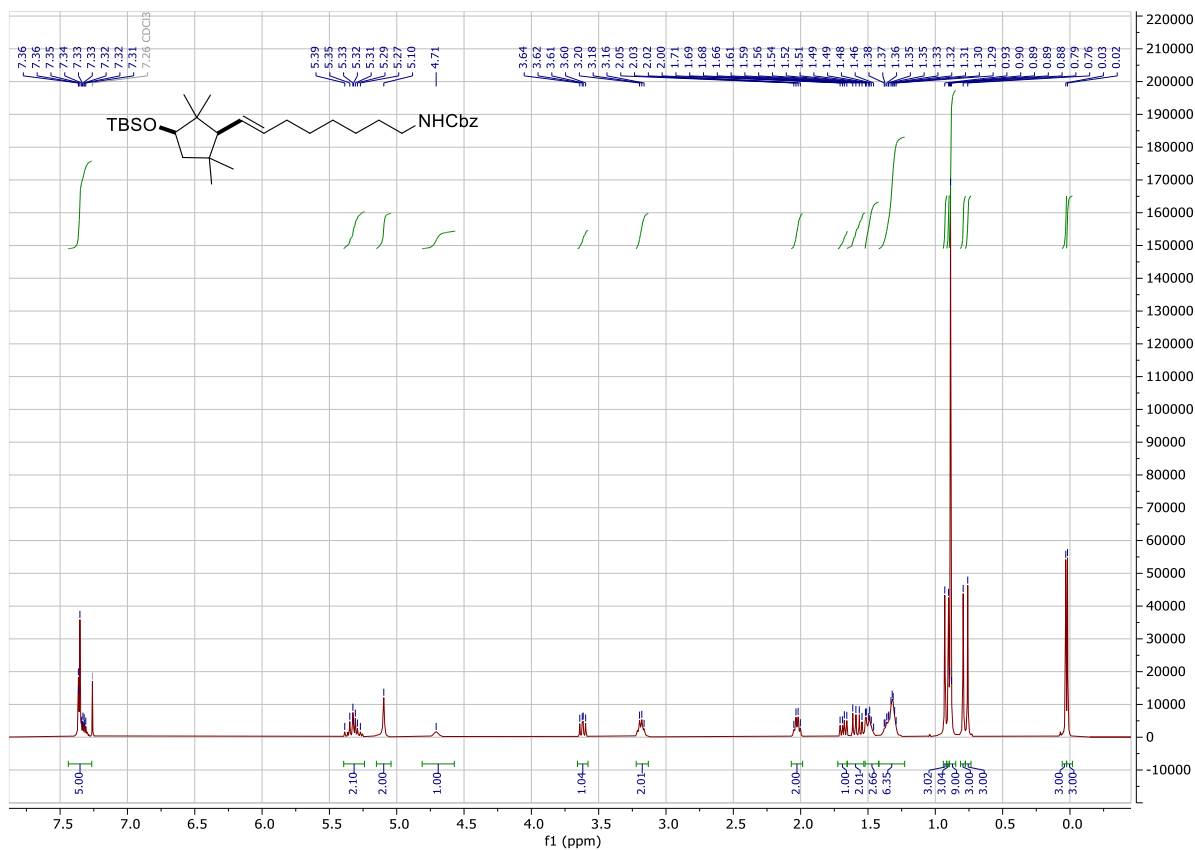

**Figure S-31**  $^1\text{H-NMR}$  spectrum of compound 11.

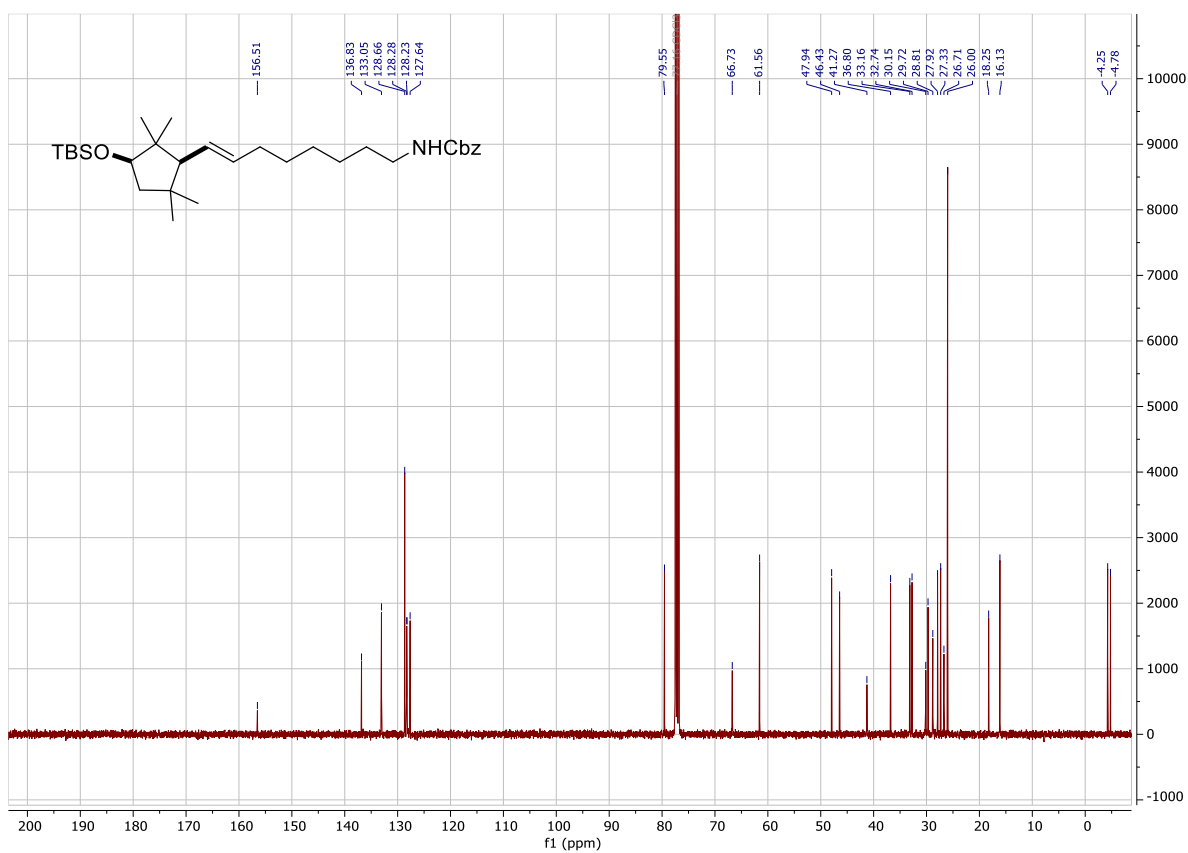

**Figure 32**  $^{13}\text{C-NMR}$  spectrum of compound 11.

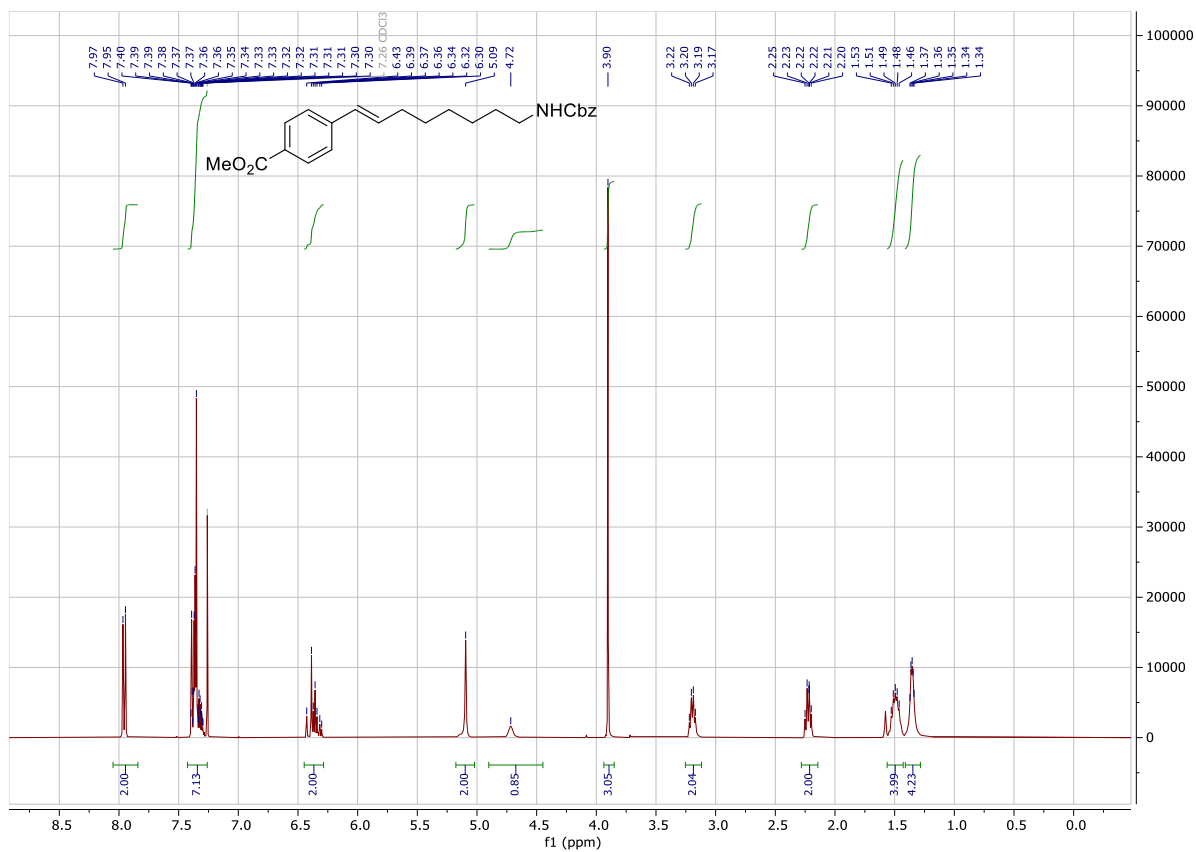

Figure S-33  $^1\text{H-NMR}$  spectrum of compound 12.

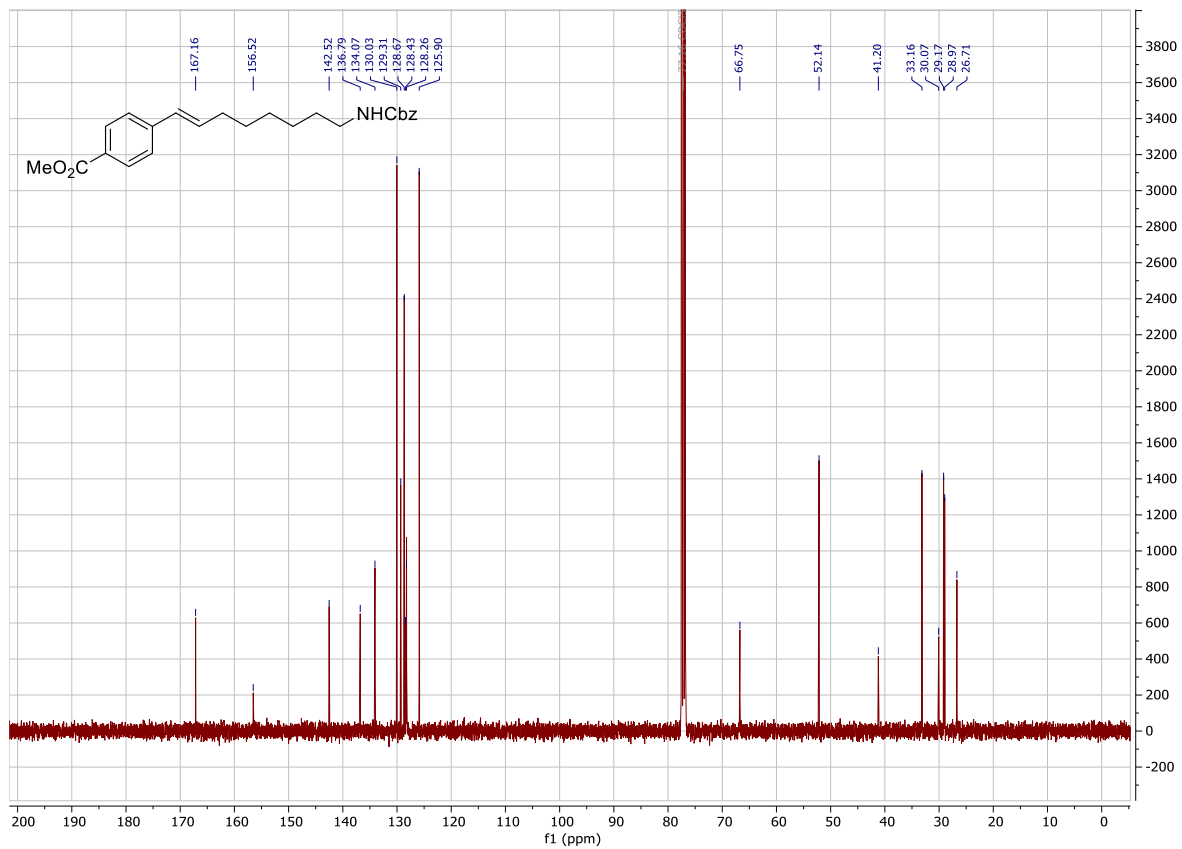

Figure 34  $^{13}\text{C-NMR}$  spectrum of compound 12.

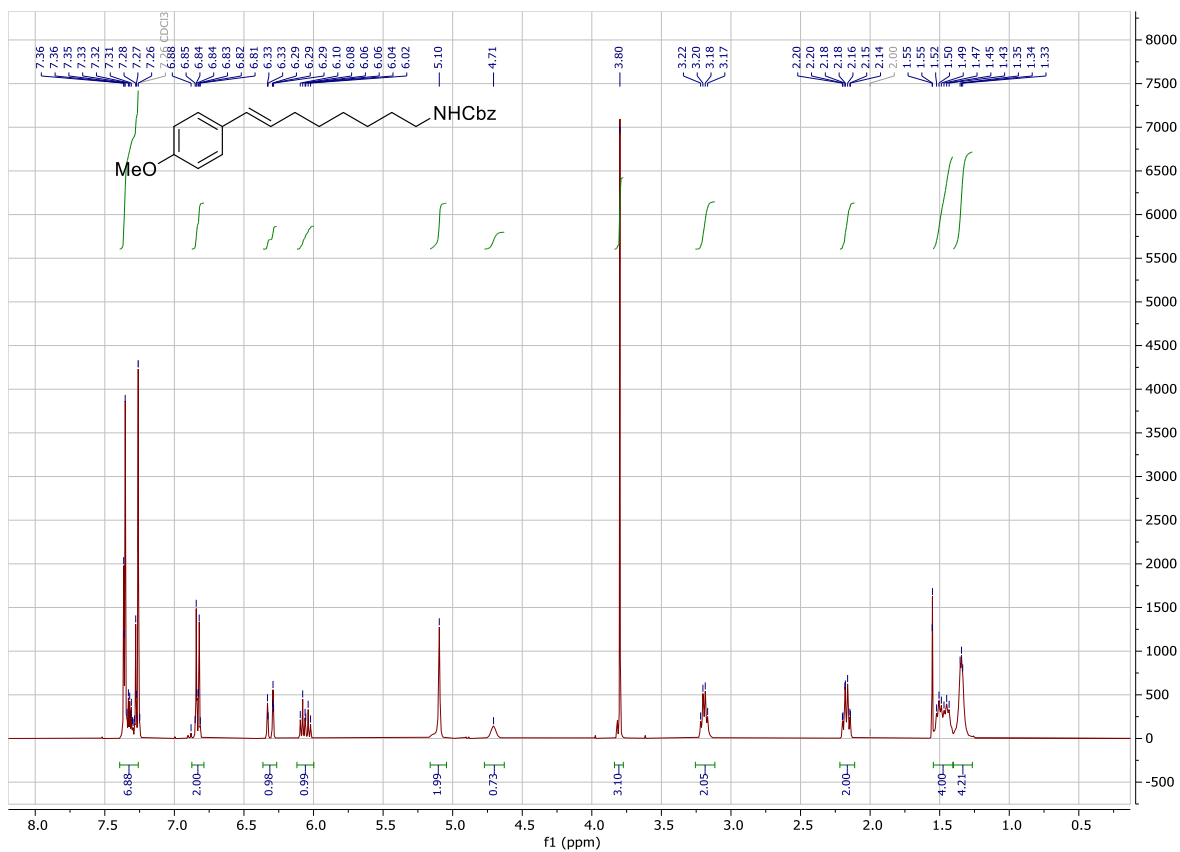

Figure S-35 <sup>1</sup>H-NMR spectrum of compound 13.

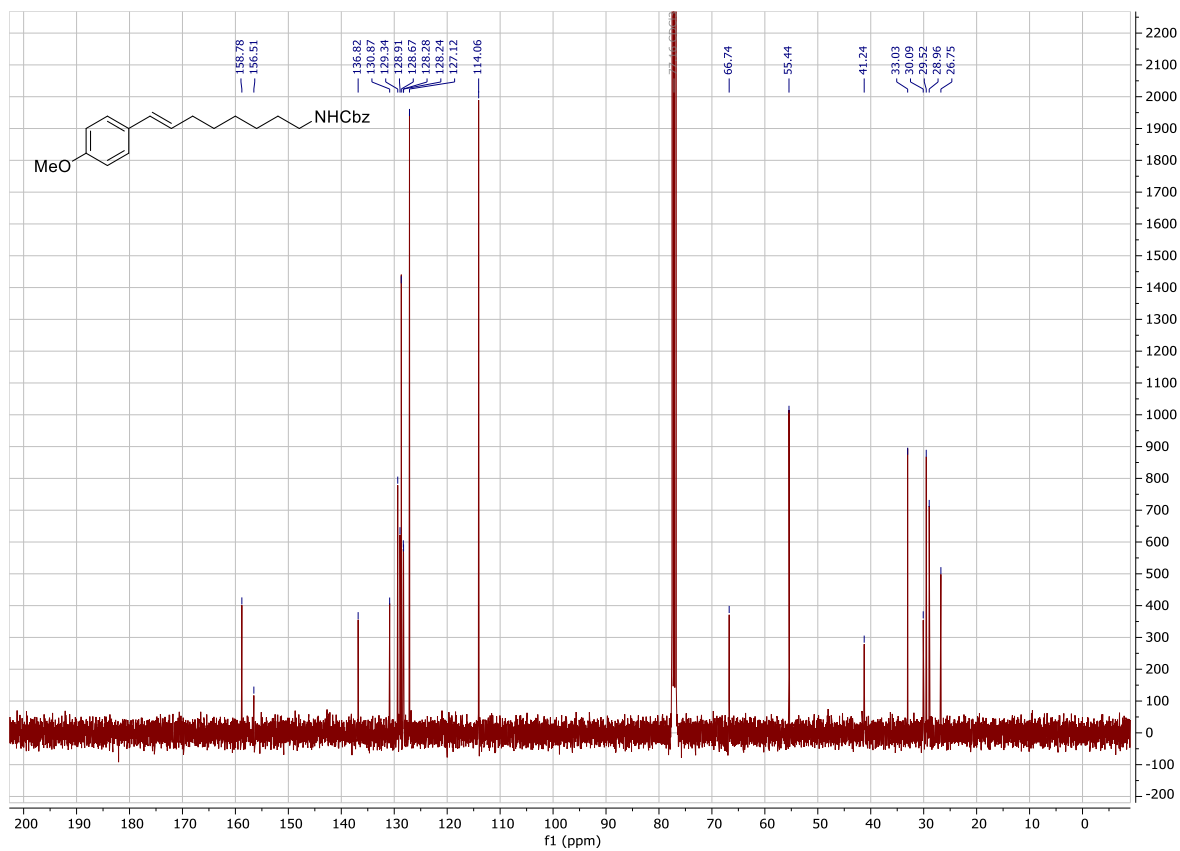

Figure 36 <sup>13</sup>C NMR spectrum of compound 13.

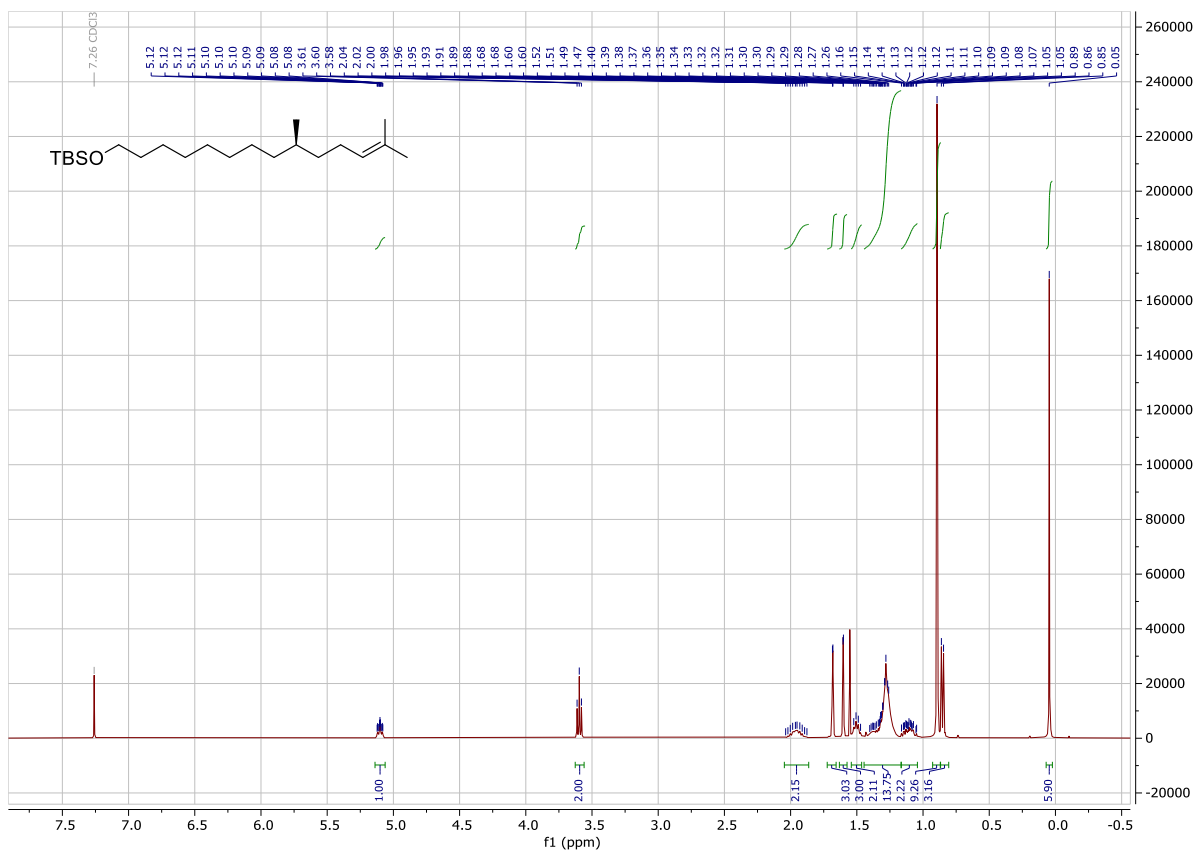

Figure S-37 <sup>1</sup>H-NMR spectrum of compound 14.

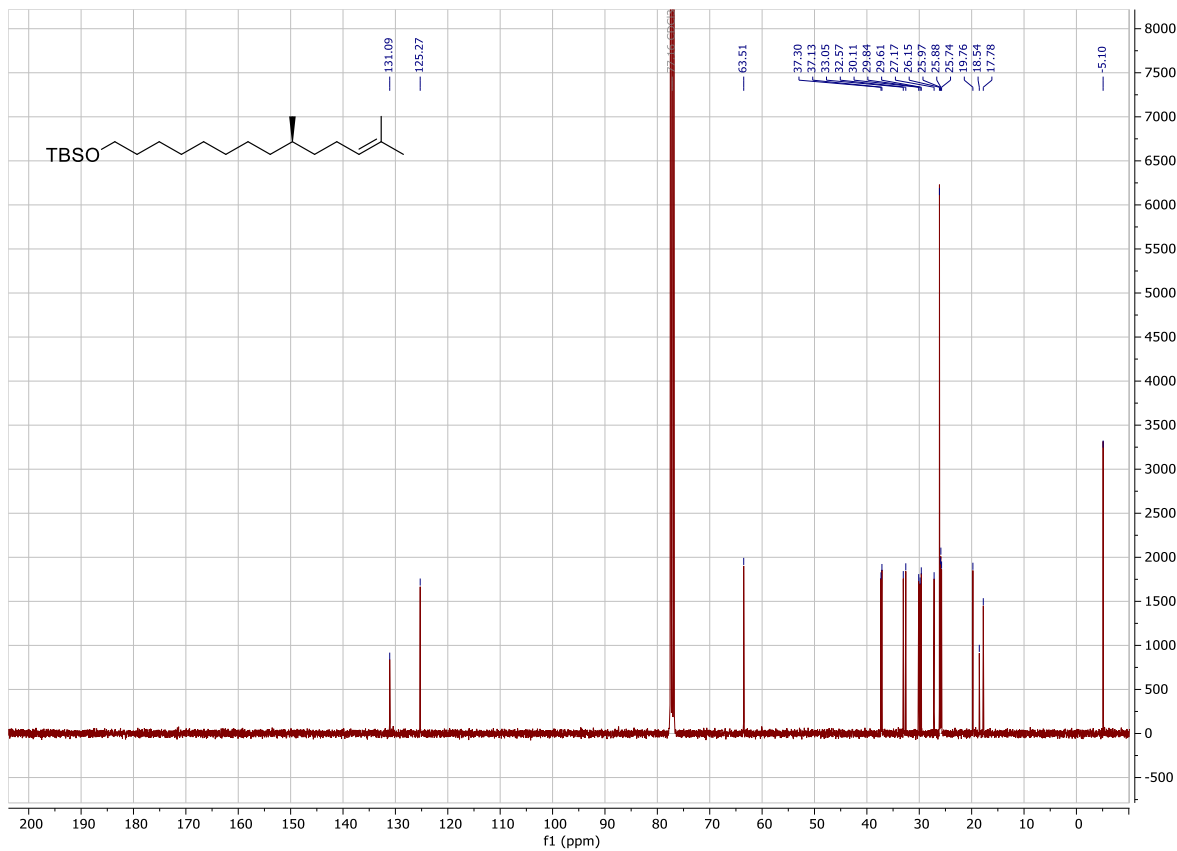

Figure S-38 <sup>13</sup>C NMR spectrum of compound 14.

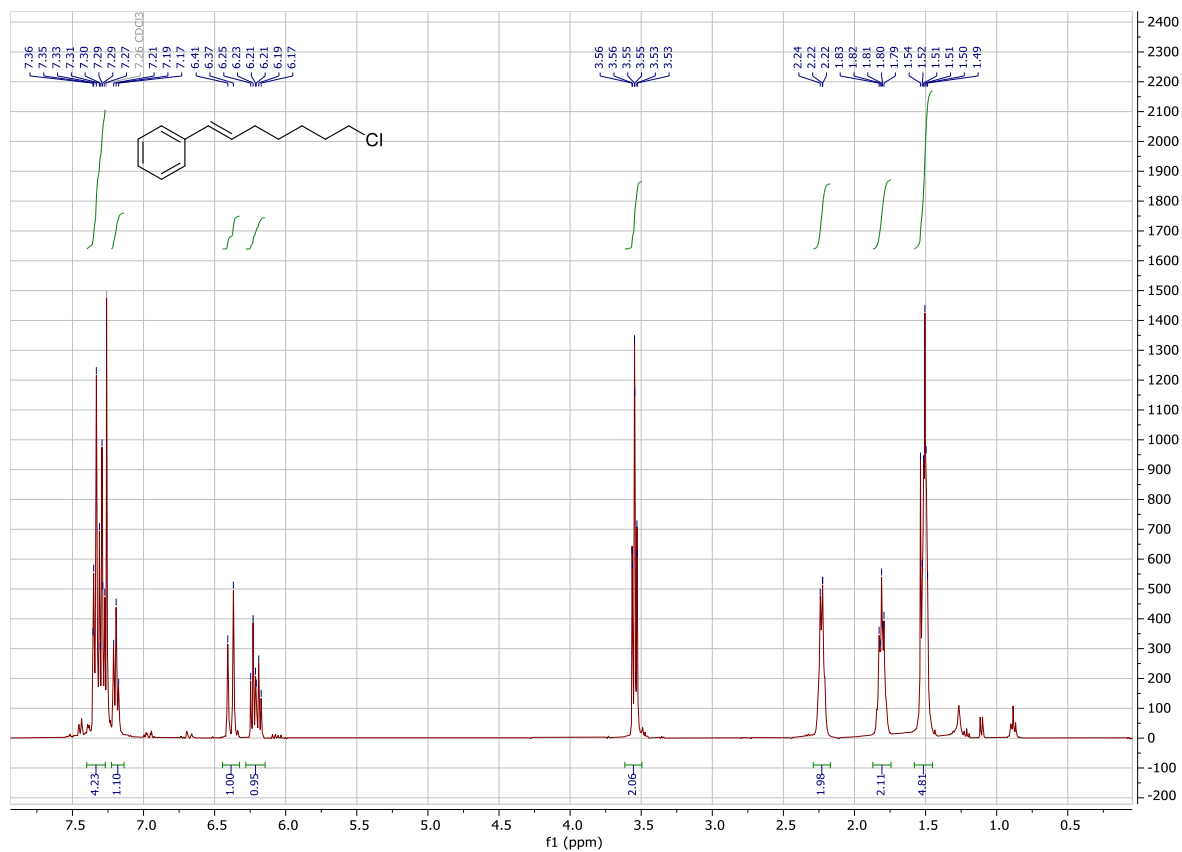

Figure S-39  $^1\text{H}$ -NMR spectrum of compound 15.

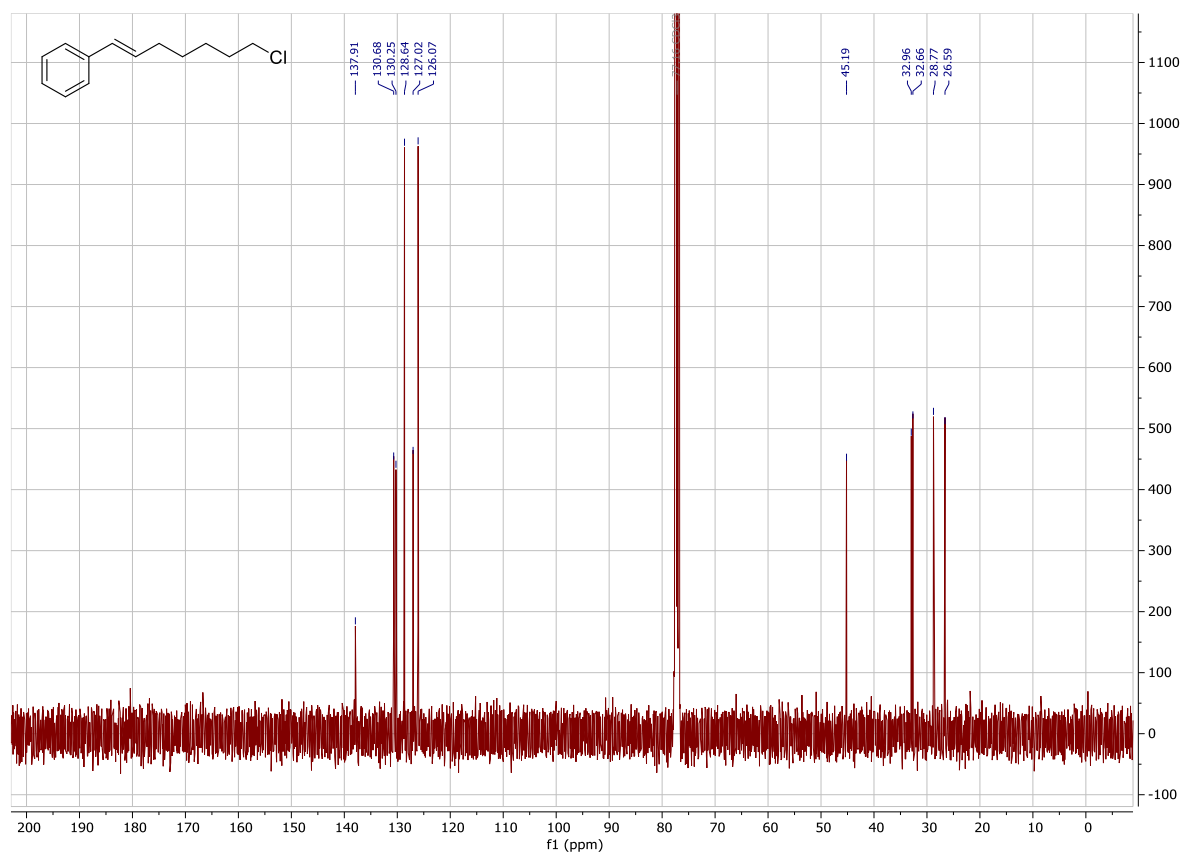

Figure 40  $^{13}\text{C}$  NMR spectrum of compound 15.

## Quantum Mechanical Spectral Analysis (QMSA) employing Chemadder

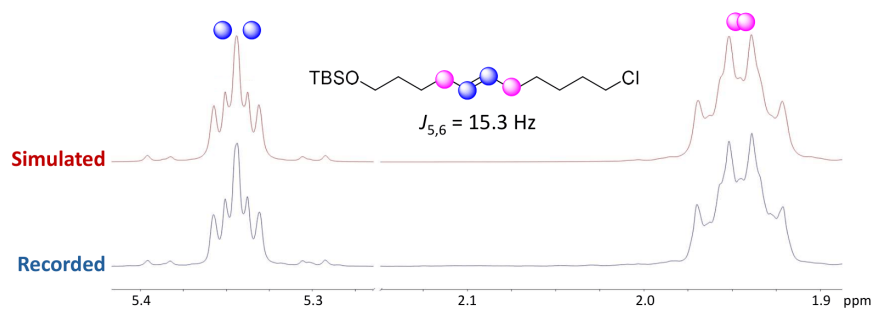

**Figure S-41** Selected  $^1\text{H}$  NMR resonances of the product from Entry 1: Comparison of simulated and experimental signals.

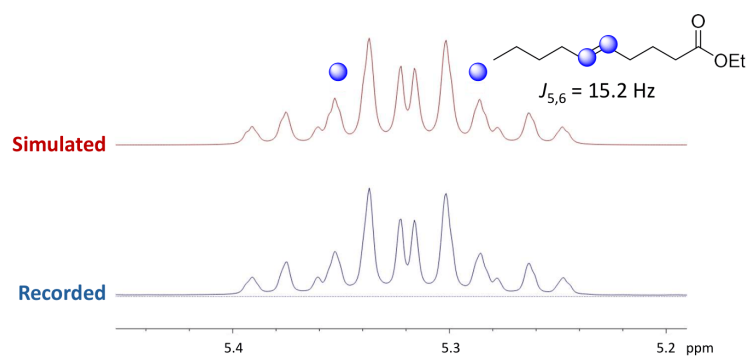

**Figure S-42** Selected  $^1\text{H}$  NMR resonances of the product from Entry 2: Comparison of simulated and experimental signals.

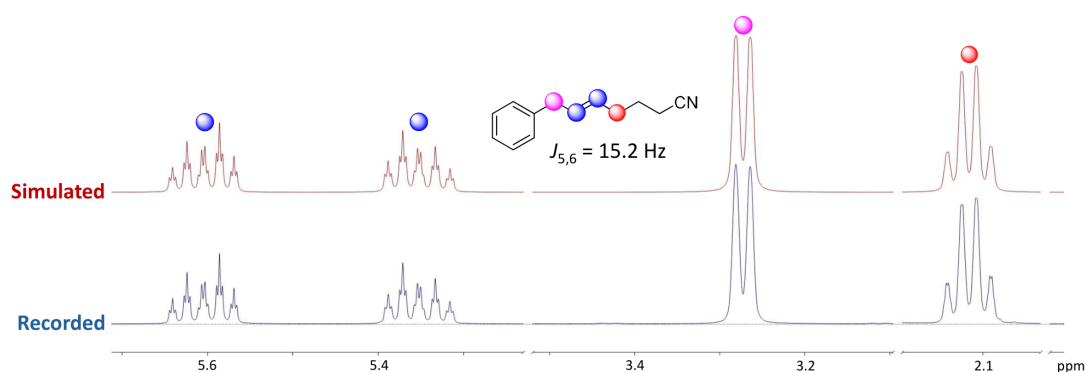

**Figure S-43** Selected  $^1\text{H}$  NMR resonances of the product from Entry 3: Comparison of simulated and experimental signals.

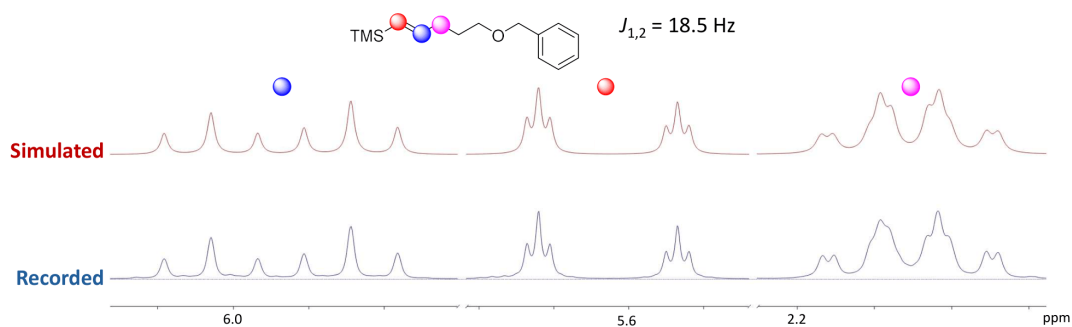

**Figure S-44** Selected  $^1\text{H}$  NMR resonances of the product from Entry 4: Comparison of simulated and experimental signals.

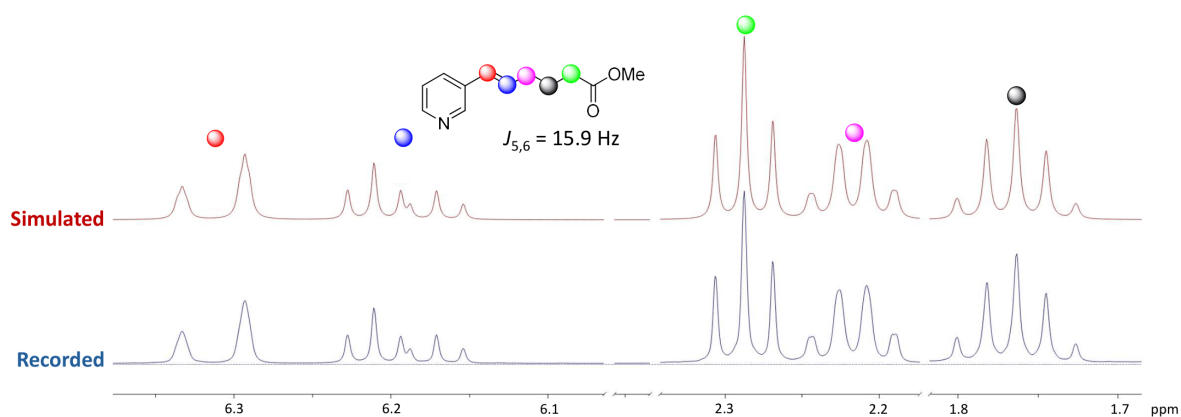

**Figure S-45** Selected  $^1\text{H}$  NMR resonances of the product from Entry 5: Comparison of simulated and experimental signals.

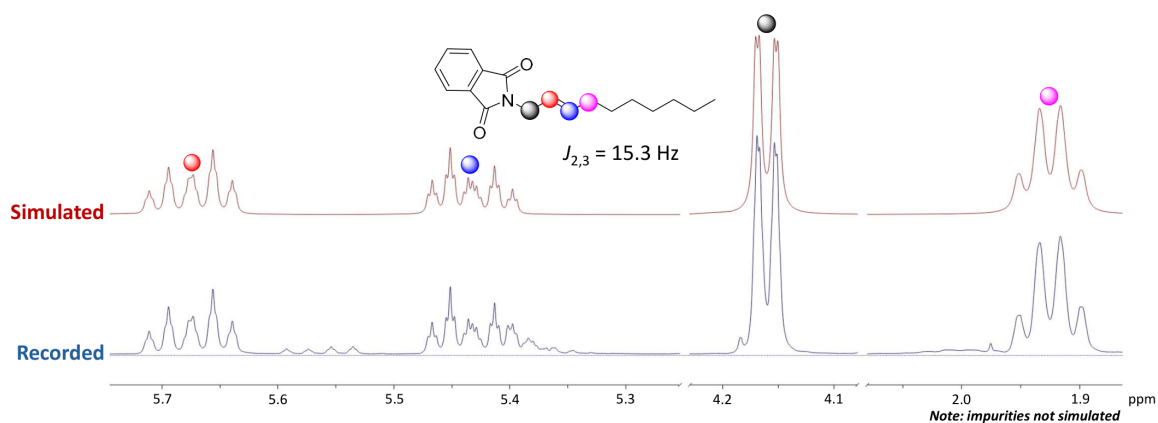

**Figure S-46** Selected  $^1\text{H}$  NMR resonances of the product from Entry 6: Comparison of simulated and experimental signals.

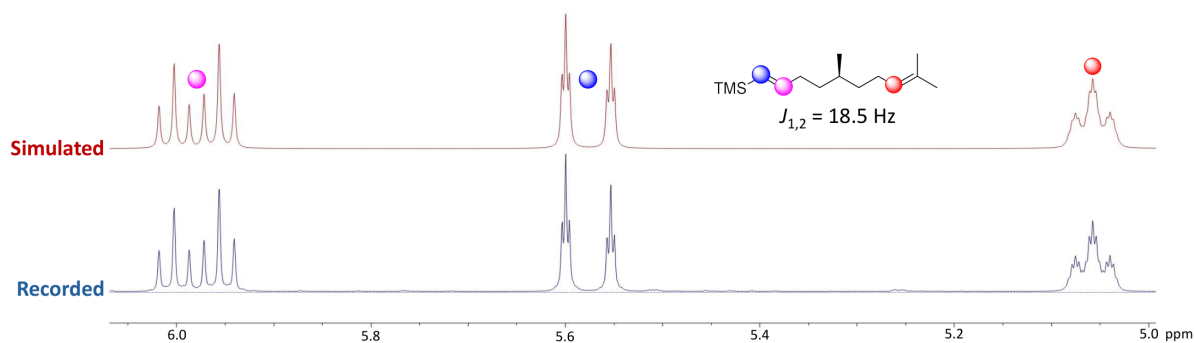

**Figure S-47** Selected  $^1\text{H}$  NMR resonances of the product from Entry 7: Comparison of simulated and experimental signals.

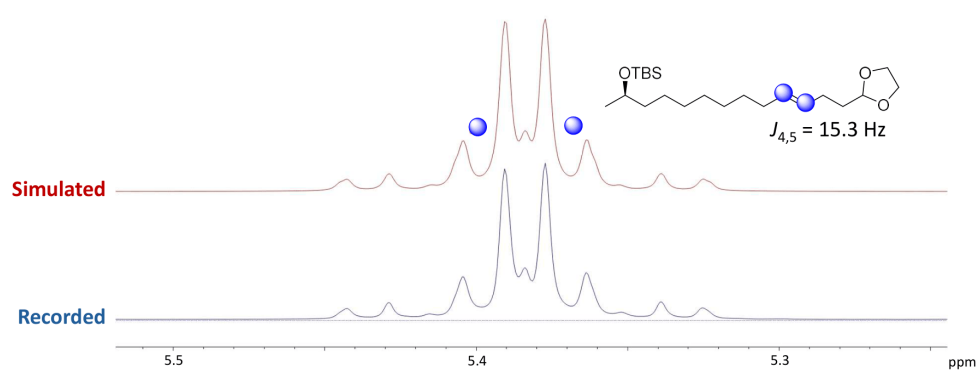

**Figure S-48** Selected  $^1\text{H}$  NMR resonances of the product from Entry 8: Comparison of simulated and experimental signals.

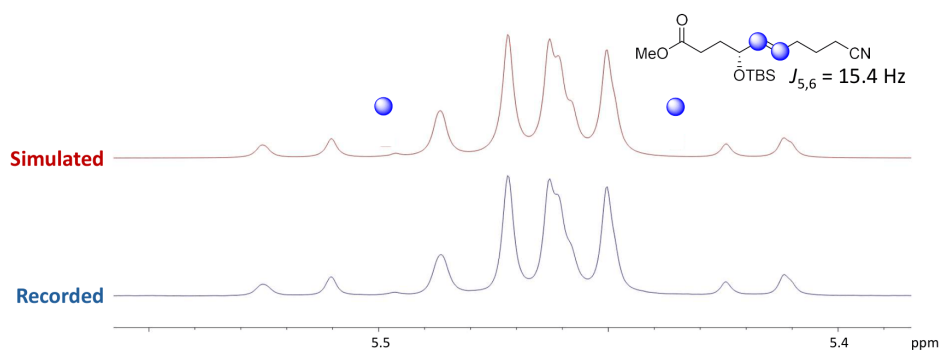

**Figure S-49** Selected  $^1\text{H}$  NMR resonances of the product from Entry 9: Comparison of simulated and experimental signals.

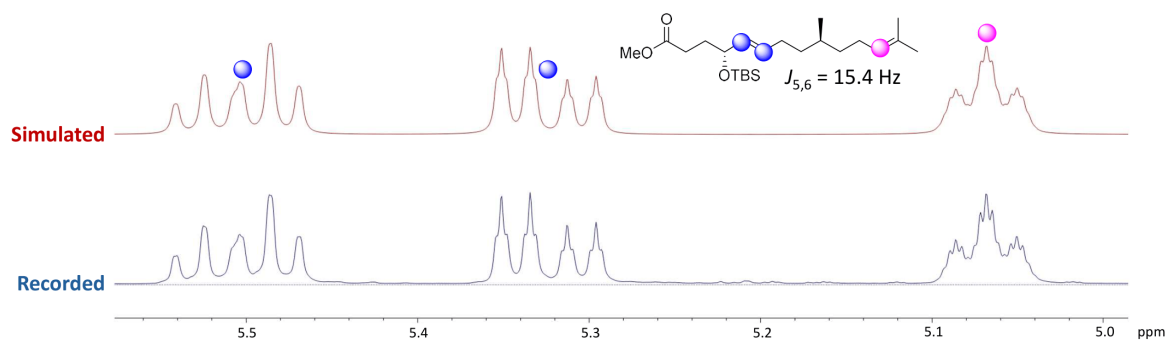

**Figure S-50** Selected  $^1\text{H}$  NMR resonances of the product from Entry 10: Comparison of simulated and experimental signals.

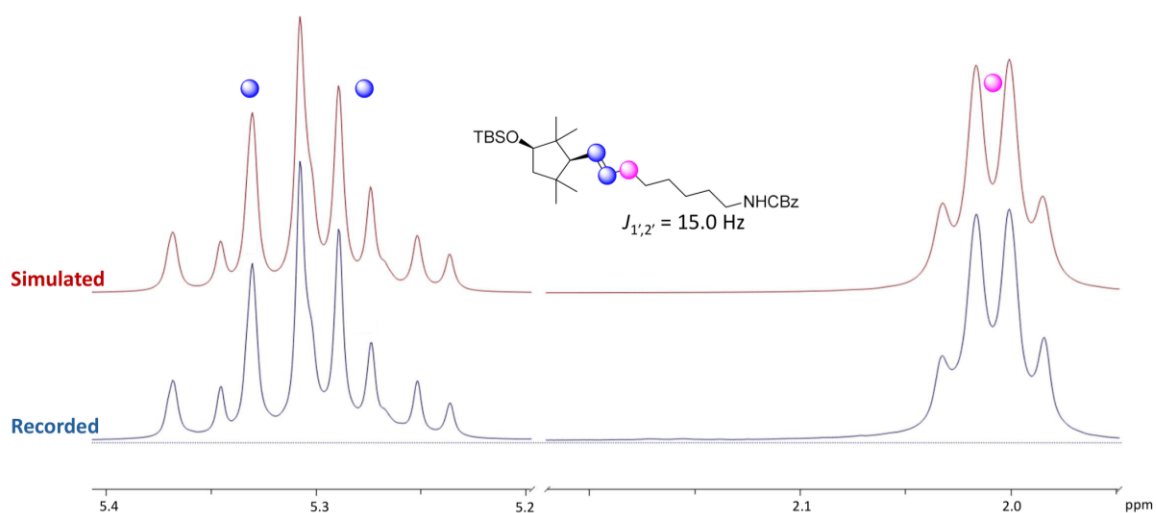

**Figure S-51** Selected  $^1\text{H}$  NMR resonances of the product from Entry 11: Comparison of simulated and experimental signals.

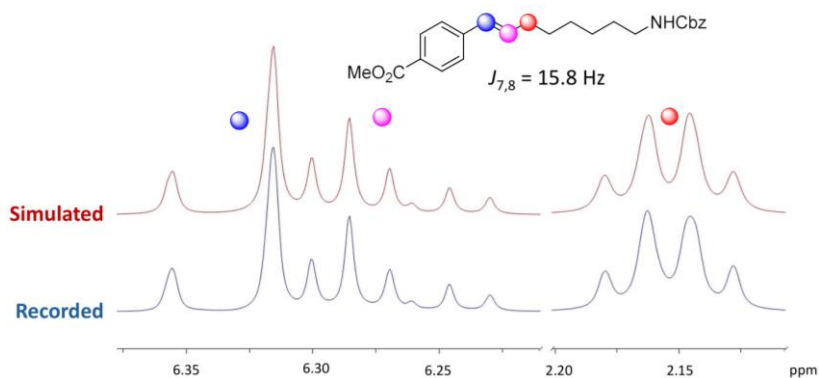

**Figure S-52** Selected  $^1\text{H}$  NMR resonances of the product from Entry 12: Comparison of simulated and experimental signals.

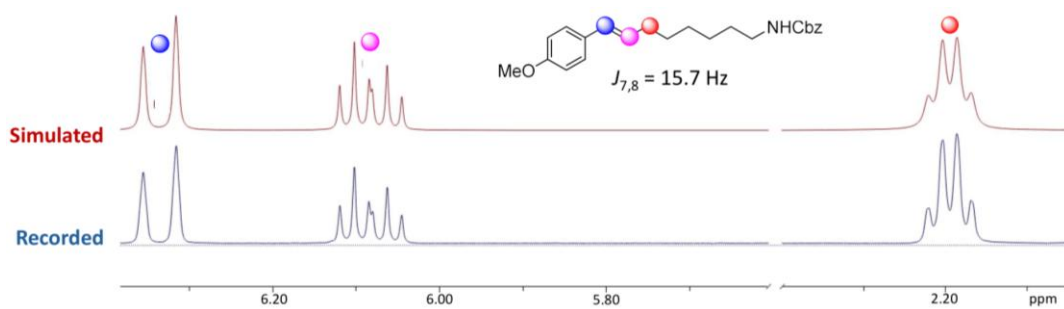

**Figure S-53** Selected  $^1\text{H}$  NMR resonances of the product from Entry 13: Comparison of simulated and experimental signals.

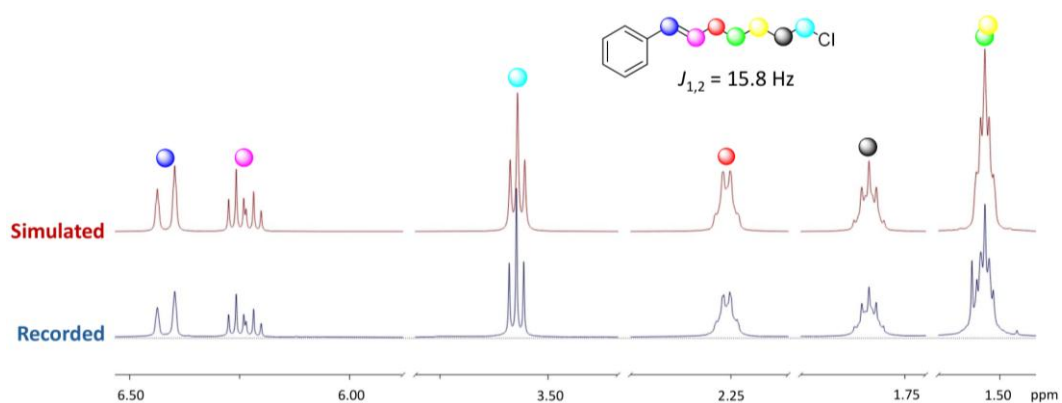

**Figure S-54** Selected  $^1\text{H}$  NMR resonances of the product from product 15: Comparison of simulated and experimental signals.

## HRMS-spectra

### Acquisition Parameter

|             |            |                      |        |                  |           |
|-------------|------------|----------------------|--------|------------------|-----------|
| Source Type | ESI        | Set Capillary        | 3500 V | Set Nebulizer    | 0.5 Bar   |
| Focus       | Not active | Set End Plate Offset | -500 V | Set Dry Heater   | 200 °C    |
| Scan Begin  | 50 m/z     | Set Charging Voltage | 2000 V | Set Dry Gas      | 4.0 l/min |
| Scan End    | 1500 m/z   | Set Corona           | 0 nA   | Set Divert Valve | Source    |
|             |            |                      |        | Set APCI Heater  | 0 °C      |

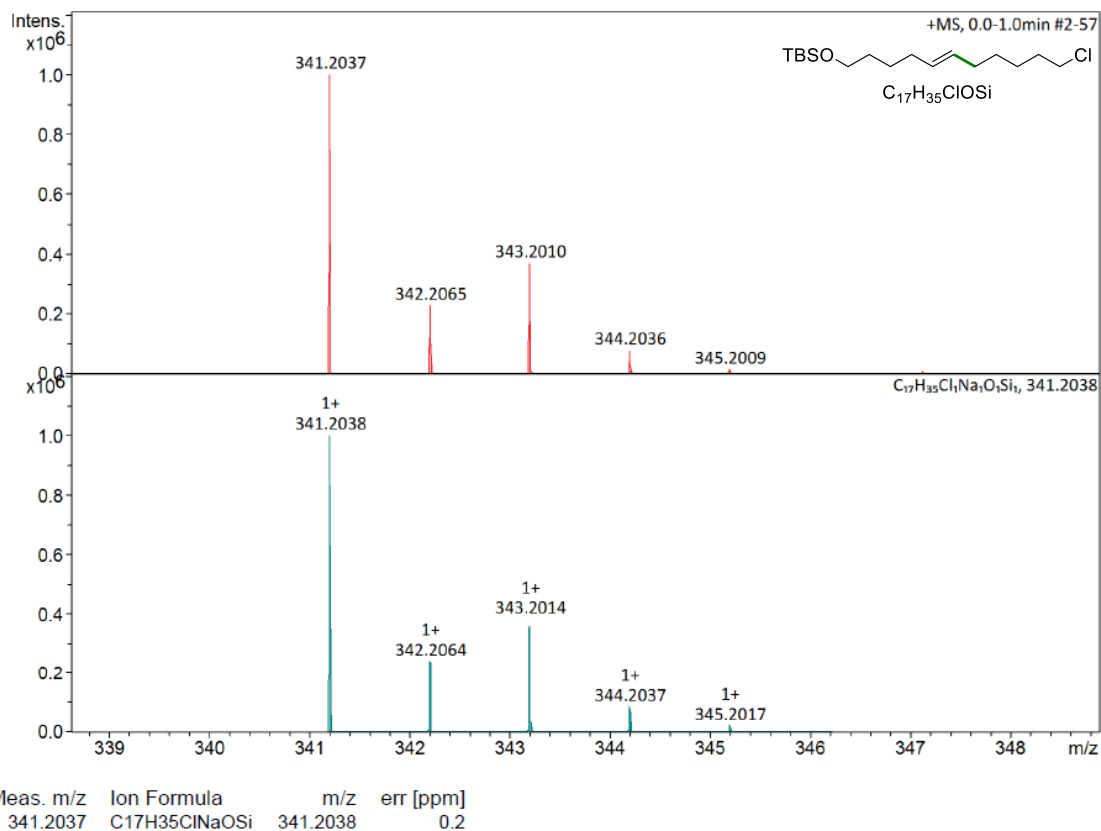

**Figure S-55** HRMS of **1**: *Top*: experimental HRMS spectrum. *Bottom*: simulated spectrum.

**Acquisition Parameter**

|             |            |                      |        |                  |           |
|-------------|------------|----------------------|--------|------------------|-----------|
| Source Type | ESI        | Set Capillary        | 3500 V | Set Nebulizer    | 0.5 Bar   |
| Focus       | Not active | Set End Plate Offset | -500 V | Set Dry Heater   | 200 °C    |
| Scan Begin  | 50 m/z     | Set Charging Voltage | 2000 V | Set Dry Gas      | 4.0 l/min |
| Scan End    | 1500 m/z   | Set Corona           | 0 nA   | Set Divert Valve | Source    |
|             |            |                      |        | Set APCI Heater  | 0 °C      |

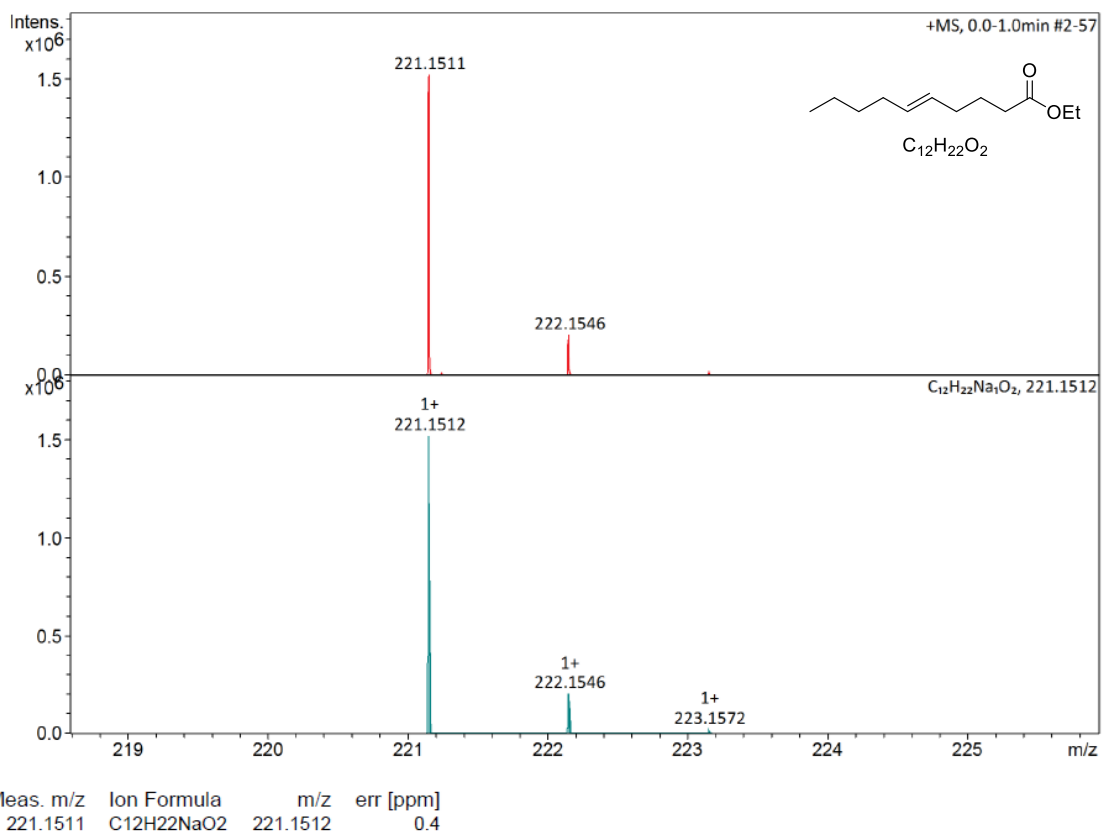

**Figure S-56** HRMS of **2**: *Top*: experimental HRMS spectrum. *Bottom*: simulated spectrum.

**Acquisition Parameter**

|             |            |                      |        |                  |           |
|-------------|------------|----------------------|--------|------------------|-----------|
| Source Type | ESI        | Set Capillary        | 3500 V | Set Nebulizer    | 0.5 Bar   |
| Focus       | Not active | Set End Plate Offset | -500 V | Set Dry Heater   | 200 °C    |
| Scan Begin  | 50 m/z     | Set Charging Voltage | 2000 V | Set Dry Gas      | 4.0 l/min |
| Scan End    | 1500 m/z   | Set Corona           | 0 nA   | Set Divert Valve | Source    |
|             |            |                      |        | Set APCI Heater  | 0 °C      |

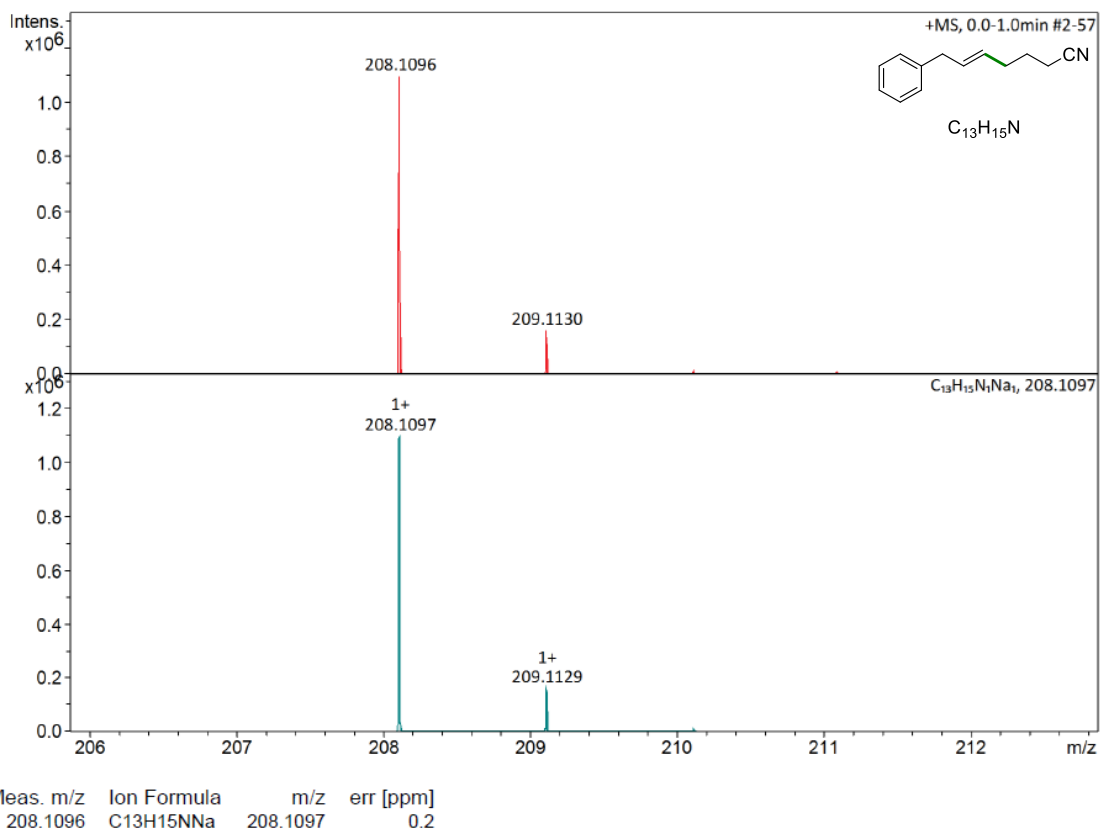

**Figure S-57** HRMS of **3**: *Top*: experimental HRMS spectrum. *Bottom*: simulated spectrum.

**Acquisition Parameter**

|             |            |                      |        |                  |           |
|-------------|------------|----------------------|--------|------------------|-----------|
| Source Type | ESI        | Set Capillary        | 3500 V | Set Nebulizer    | 0.5 Bar   |
| Focus       | Not active | Set End Plate Offset | -500 V | Set Dry Heater   | 200 °C    |
| Scan Begin  | 50 m/z     | Set Charging Voltage | 2000 V | Set Dry Gas      | 4.0 l/min |
| Scan End    | 1500 m/z   | Set Corona           | 0 nA   | Set Divert Valve | Source    |
|             |            |                      |        | Set APCI Heater  | 0 °C      |

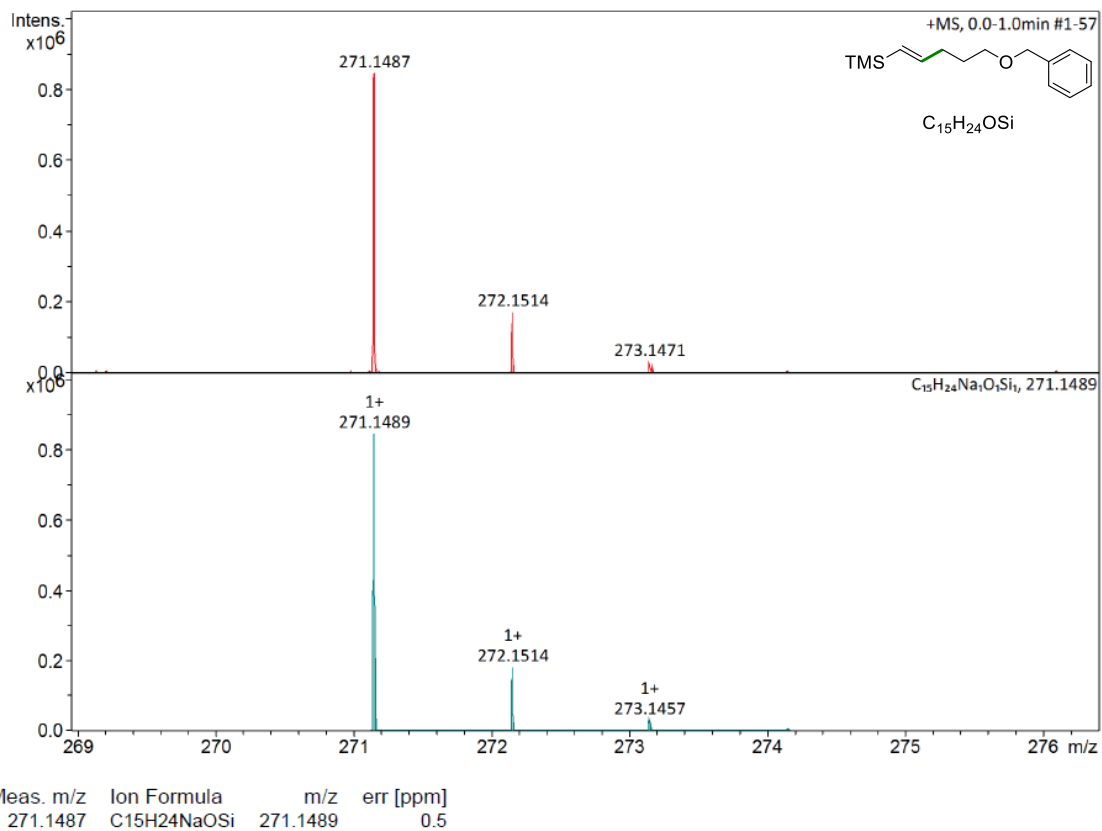

**Figure S-58** HRMS of 4: *Top*: experimental HRMS spectrum. *Bottom*: simulated spectrum.

**Acquisition Parameter**

|             |            |                      |        |                  |           |
|-------------|------------|----------------------|--------|------------------|-----------|
| Source Type | ESI        | Set Capillary        | 3500 V | Set Nebulizer    | 0.5 Bar   |
| Focus       | Not active | Set End Plate Offset | -500 V | Set Dry Heater   | 200 °C    |
| Scan Begin  | 50 m/z     | Set Charging Voltage | 2000 V | Set Dry Gas      | 4.0 l/min |
| Scan End    | 1500 m/z   | Set Corona           | 0 nA   | Set Divert Valve | Source    |
|             |            |                      |        | Set APCI Heater  | 0 °C      |

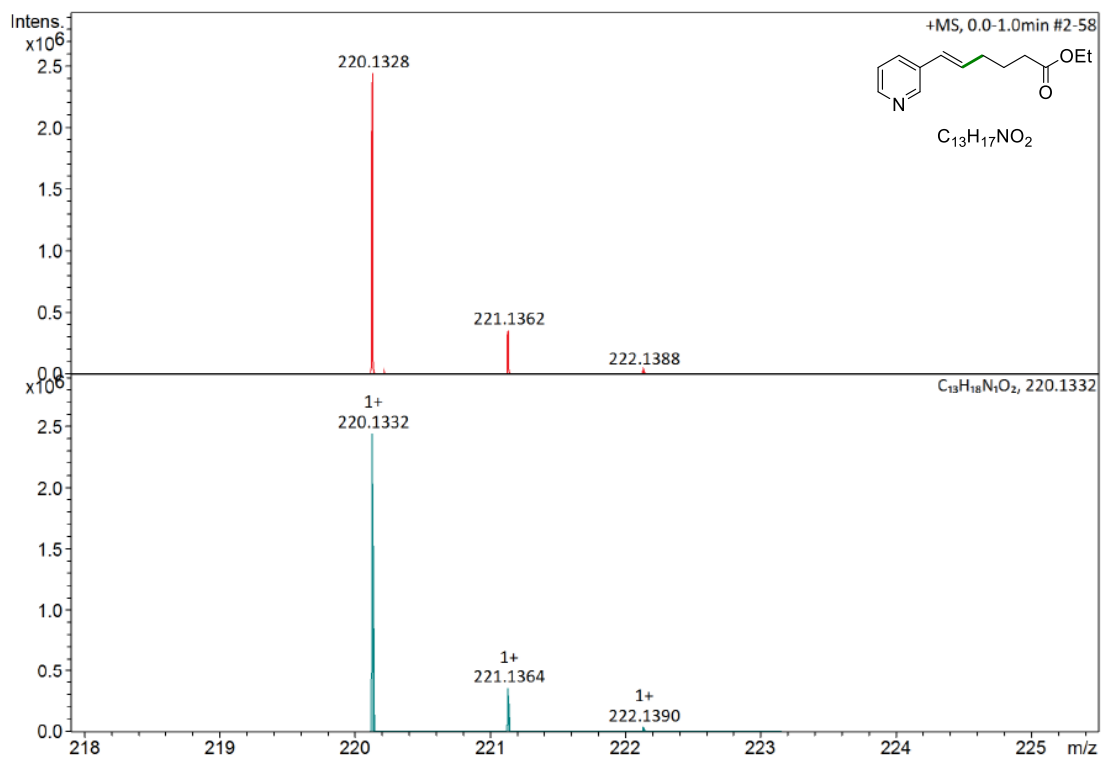

| Meas. m/z | Ion Formula                                       | m/z      | err [ppm] |
|-----------|---------------------------------------------------|----------|-----------|
| 220.1328  | C <sub>13</sub> H <sub>18</sub> NO <sub>2</sub>   | 220.1332 | 1.7       |
| 242.1148  | C <sub>13</sub> H <sub>17</sub> NNaO <sub>2</sub> | 242.1151 | 1.2       |

**Figure S-59** HRMS of **5**: *Top*: experimental HRMS spectrum. *Bottom*: simulated spectrum.

**Acquisition Parameter**

|             |            |                      |        |                  |           |
|-------------|------------|----------------------|--------|------------------|-----------|
| Source Type | ESI        | Set Capillary        | 3500 V | Set Nebulizer    | 0.5 Bar   |
| Focus       | Not active | Set End Plate Offset | -500 V | Set Dry Heater   | 200 °C    |
| Scan Begin  | 50 m/z     | Set Charging Voltage | 2000 V | Set Dry Gas      | 4.0 l/min |
| Scan End    | 1500 m/z   | Set Corona           | 0 nA   | Set Divert Valve | Source    |
|             |            |                      |        | Set APCI Heater  | 0 °C      |

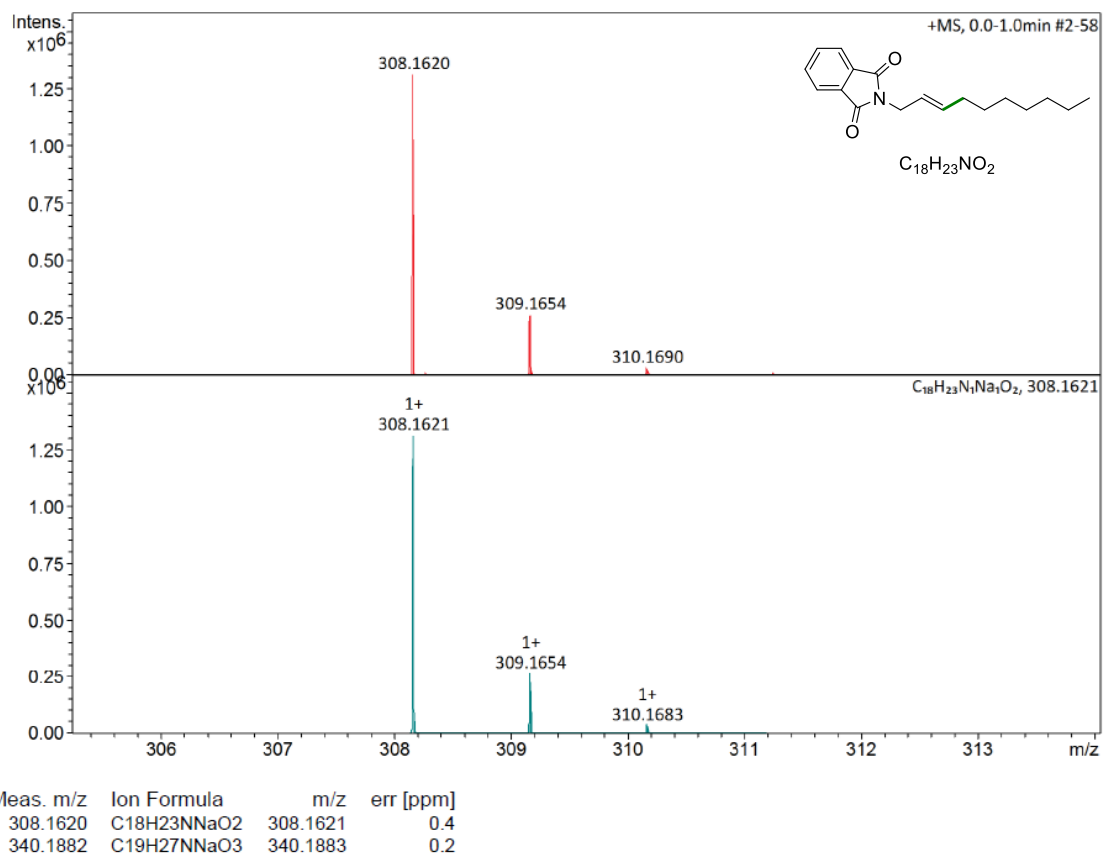

**Figure S-60** HRMS of **6**: *Top*: experimental HRMS spectrum. *Bottom*: simulated spectrum.

**Acquisition Parameter**

|             |            |                      |         |                  |           |
|-------------|------------|----------------------|---------|------------------|-----------|
| Source Type | APCI       | Set Capillary        | 3000 V  | Set Nebulizer    | 1.6 Bar   |
| Focus       | Not active | Set End Plate Offset | -500 V  | Set Dry Heater   | 200 °C    |
| Scan Begin  | 50 m/z     | Set Charging Voltage | 2000 V  | Set Dry Gas      | 3.0 l/min |
| Scan End    | 1550 m/z   | Set Corona           | 5000 nA | Set Divert Valve | Waste     |
|             |            |                      |         | Set APCI Heater  | 100 °C    |

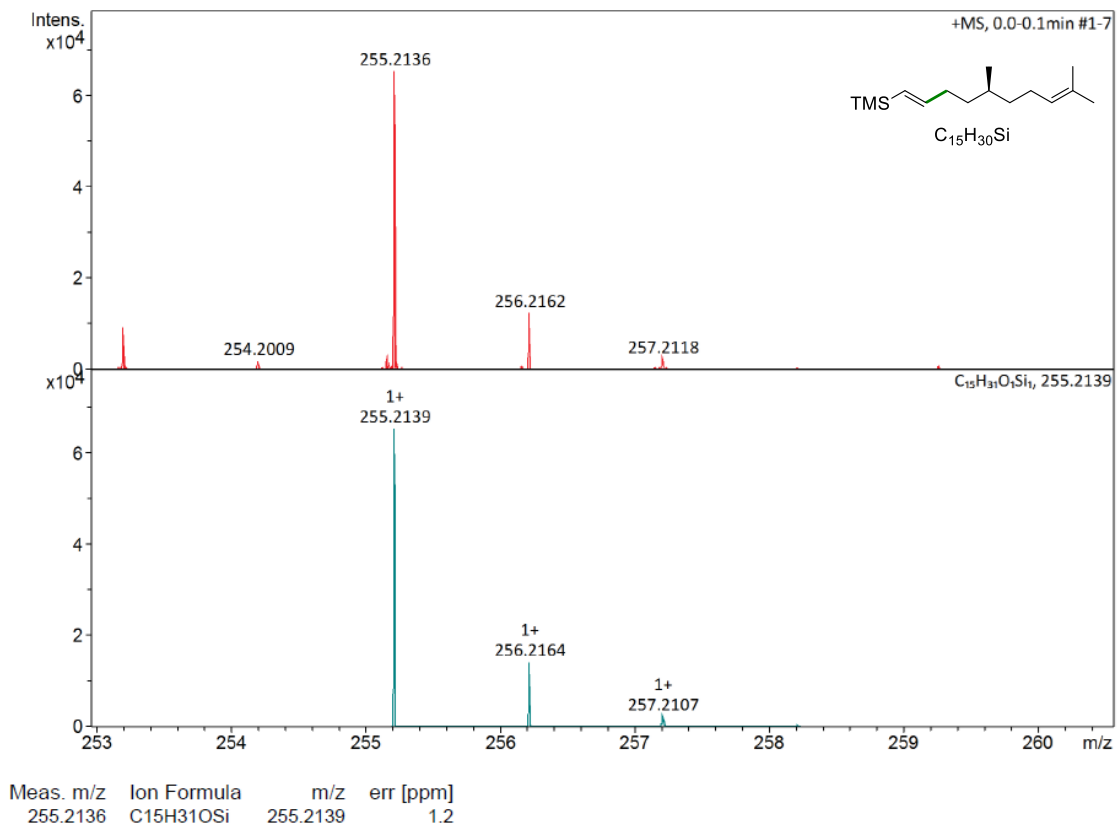

**Figure S-61** HRMS of 7: *Top*: experimental HRMS spectrum. *Bottom*: simulated spectrum.

**Acquisition Parameter**

|             |            |                      |        |                  |           |
|-------------|------------|----------------------|--------|------------------|-----------|
| Source Type | ESI        | Set Capillary        | 3500 V | Set Nebulizer    | 0.5 Bar   |
| Focus       | Not active | Set End Plate Offset | -500 V | Set Dry Heater   | 200 °C    |
| Scan Begin  | 50 m/z     | Set Charging Voltage | 2000 V | Set Dry Gas      | 4.0 l/min |
| Scan End    | 1500 m/z   | Set Corona           | 0 nA   | Set Divert Valve | Source    |
|             |            |                      |        | Set APCI Heater  | 0 °C      |

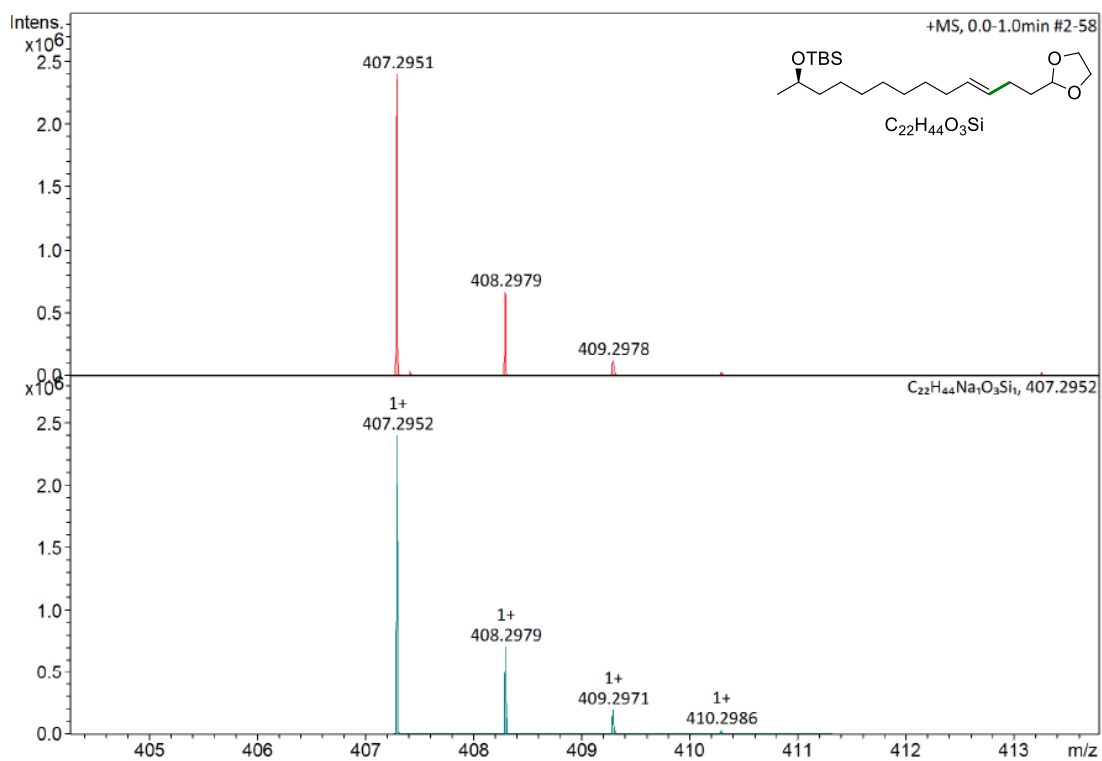

| Meas. m/z | Ion Formula                                         | m/z      | err [ppm] |
|-----------|-----------------------------------------------------|----------|-----------|
| 407.2951  | C <sub>22</sub> H <sub>44</sub> NaO <sub>3</sub> Si | 407.2952 | 0.3       |

**Figure S-62** HRMS of **8**: *Top*: experimental HRMS spectrum. *Bottom*: simulated spectrum.

**Acquisition Parameter**

|             |            |                      |        |                  |           |
|-------------|------------|----------------------|--------|------------------|-----------|
| Source Type | ESI        | Set Capillary        | 3500 V | Set Nebulizer    | 0.5 Bar   |
| Focus       | Not active | Set End Plate Offset | -500 V | Set Dry Heater   | 200 °C    |
| Scan Begin  | 50 m/z     | Set Charging Voltage | 2000 V | Set Dry Gas      | 4.0 l/min |
| Scan End    | 1500 m/z   | Set Corona           | 0 nA   | Set Divert Valve | Waste     |
|             |            |                      |        | Set APCI Heater  | 0 °C      |

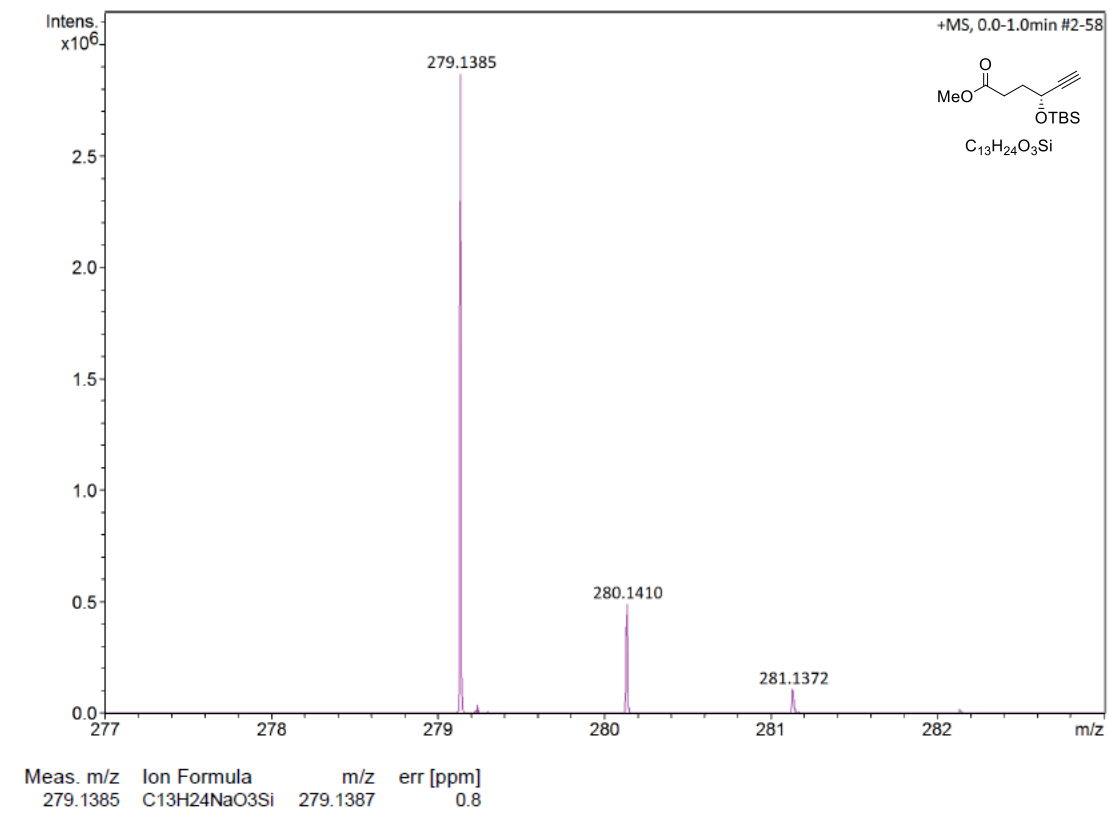**Figure S-63 HRMS of 9b.**

**Acquisition Parameter**

|             |            |                      |        |                  |           |
|-------------|------------|----------------------|--------|------------------|-----------|
| Source Type | ESI        | Set Capillary        | 3500 V | Set Nebulizer    | 0.5 Bar   |
| Focus       | Not active | Set End Plate Offset | -500 V | Set Dry Heater   | 200 °C    |
| Scan Begin  | 50 m/z     | Set Charging Voltage | 2000 V | Set Dry Gas      | 4.0 l/min |
| Scan End    | 1500 m/z   | Set Corona           | 0 nA   | Set Divert Valve | Source    |
|             |            |                      |        | Set APCI Heater  | 0 °C      |

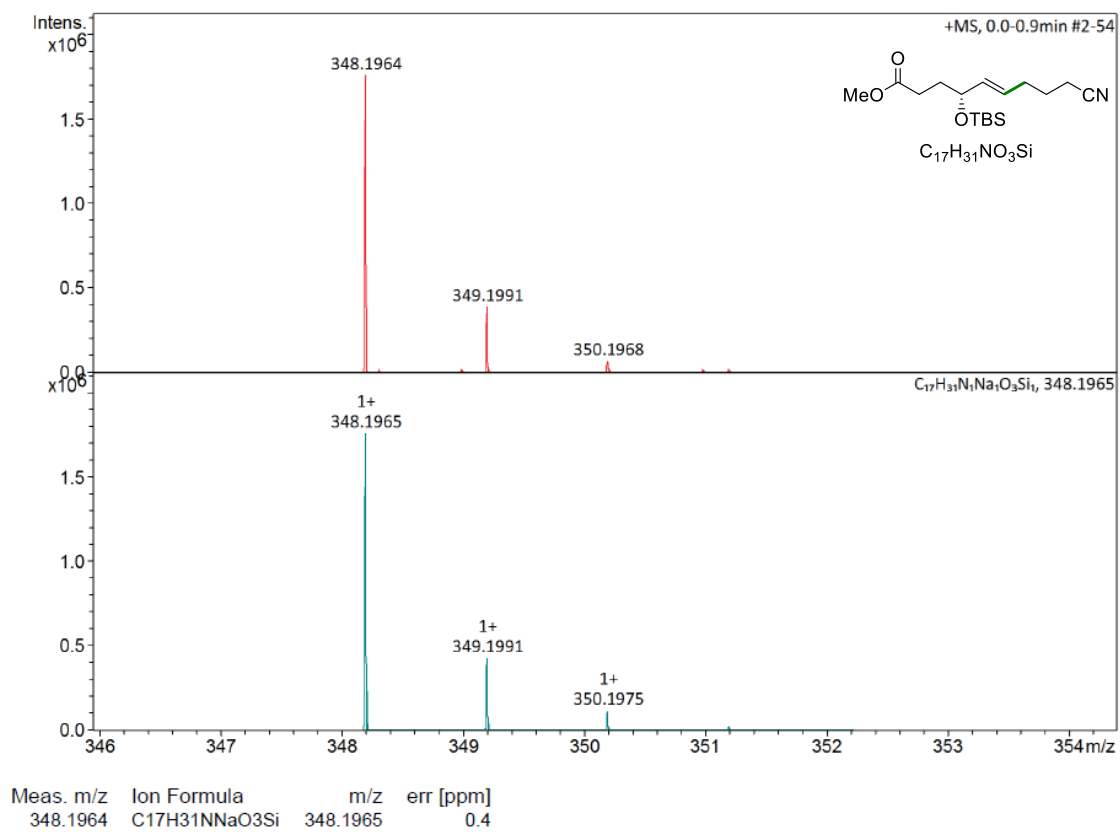

**Figure S-64** HRMS of **9**: *Top*: experimental HRMS spectrum. *Bottom*: simulated spectrum.

**Acquisition Parameter**

|             |            |                      |        |                  |           |
|-------------|------------|----------------------|--------|------------------|-----------|
| Source Type | ESI        | Set Capillary        | 3500 V | Set Nebulizer    | 0.5 Bar   |
| Focus       | Not active | Set End Plate Offset | -500 V | Set Dry Heater   | 200 °C    |
| Scan Begin  | 50 m/z     | Set Charging Voltage | 2000 V | Set Dry Gas      | 4.0 l/min |
| Scan End    | 1500 m/z   | Set Corona           | 0 nA   | Set Divert Valve | Source    |
|             |            |                      |        | Set APCI Heater  | 0 °C      |

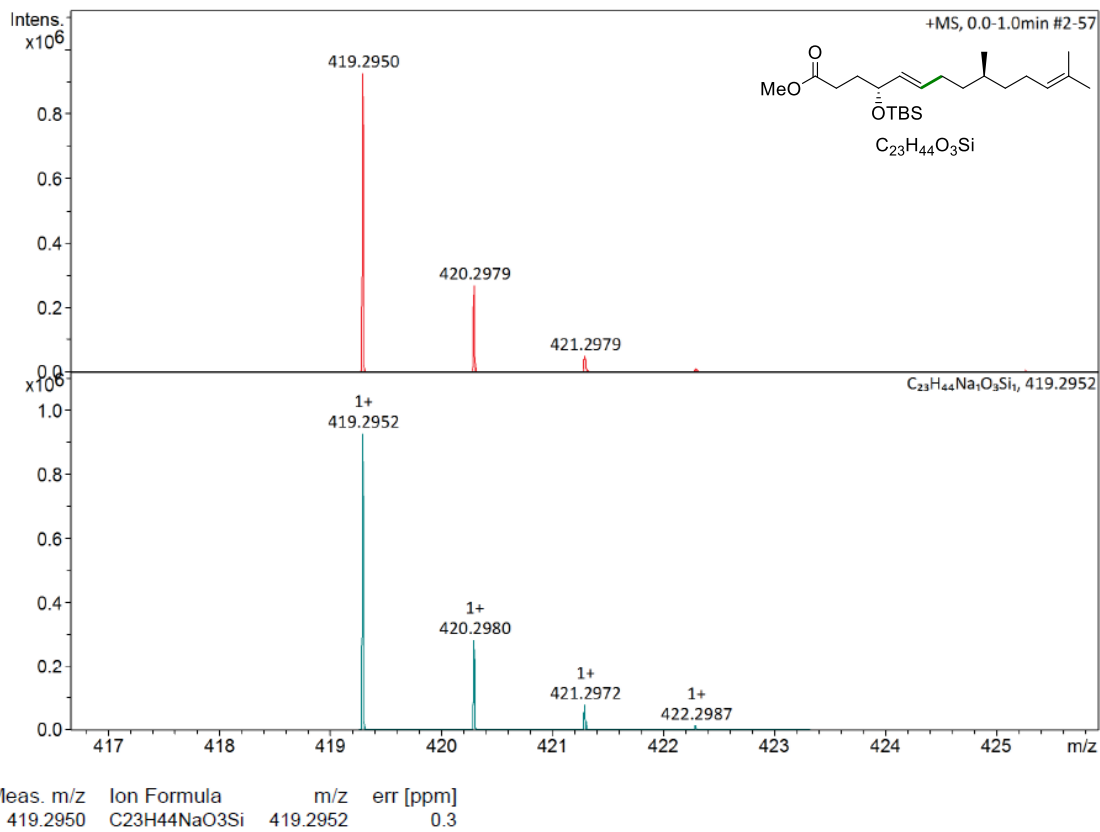

**Figure S-65** HRMS of **10**: *Top*: experimental HRMS spectrum. *Bottom*: simulated spectrum.

**Acquisition Parameter**

|             |            |                      |        |                  |           |
|-------------|------------|----------------------|--------|------------------|-----------|
| Source Type | ESI        | Set Capillary        | 3500 V | Set Nebulizer    | 0.4 Bar   |
| Focus       | Not active | Set End Plate Offset | -500 V | Set Dry Heater   | 200 °C    |
| Scan Begin  | 50 m/z     | Set Charging Voltage | 2000 V | Set Dry Gas      | 4.0 l/min |
| Scan End    | 2000 m/z   | Set Corona           | 0 nA   | Set Divert Valve | Waste     |
|             |            |                      |        | Set APCI Heater  | 0 °C      |

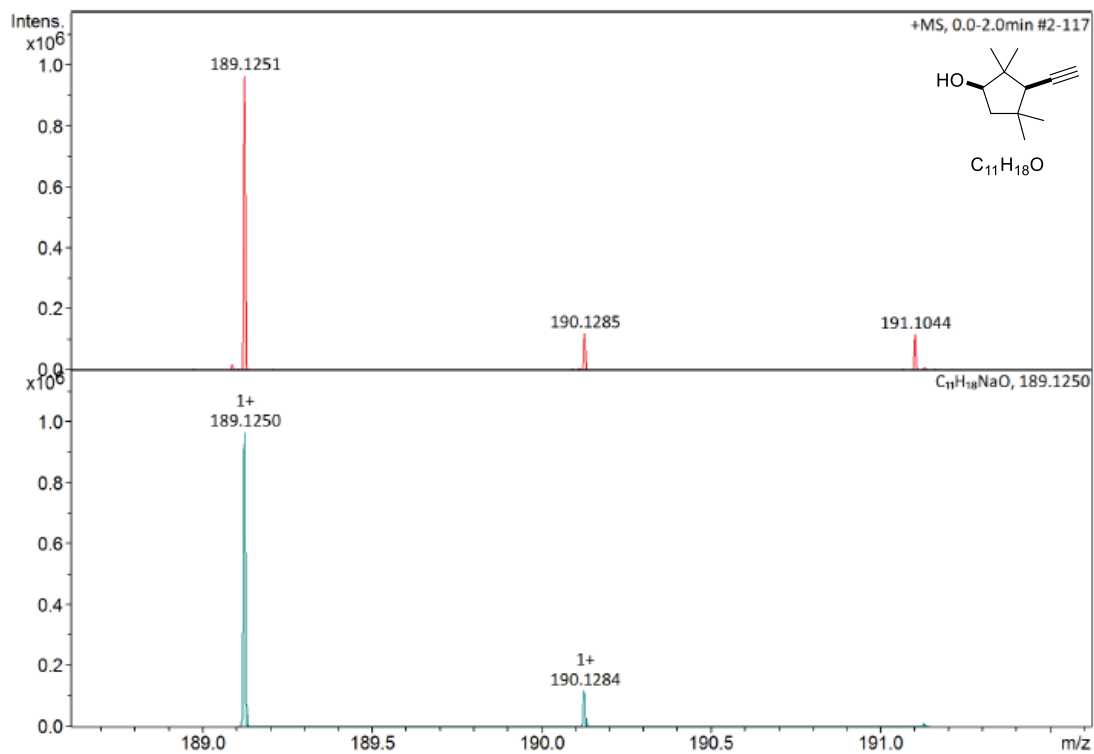

| Meas. m/z | Ion Formula                                                   | m/z      | err [ppm] |
|-----------|---------------------------------------------------------------|----------|-----------|
| 179.1044  | C <sub>7</sub> H <sub>11</sub> N <sub>6</sub>                 | 179.1040 | -2.7      |
|           | C <sub>9</sub> H <sub>16</sub> NaO <sub>2</sub>               | 179.1043 | -1.1      |
| 189.1251  | C <sub>8</sub> H <sub>17</sub> N <sub>2</sub> O <sub>3</sub>  | 189.1234 | -9.3      |
|           | C <sub>11</sub> H <sub>18</sub> NaO                           | 189.1250 | -0.8      |
| 195.0993  | C <sub>7</sub> H <sub>11</sub> N <sub>6</sub> O               | 195.0989 | -2.1      |
|           | C <sub>9</sub> H <sub>16</sub> NaO <sub>3</sub>               | 195.0992 | -0.7      |
| 209.1148  | C <sub>8</sub> H <sub>13</sub> N <sub>6</sub> O               | 209.1145 | -1.5      |
|           | C <sub>10</sub> H <sub>18</sub> NaO <sub>3</sub>              | 209.1148 | -0.1      |
| 237.1460  | C <sub>10</sub> H <sub>17</sub> N <sub>6</sub> O              | 237.1458 | -0.7      |
|           | C <sub>12</sub> H <sub>22</sub> NaO <sub>3</sub>              | 237.1461 | 0.5       |
| 357.2396  | C <sub>19</sub> H <sub>29</sub> N <sub>6</sub> O              | 357.2397 | 0.4       |
|           | C <sub>21</sub> H <sub>34</sub> NaO <sub>3</sub>              | 357.2400 | 1.1       |
| 519.3644  | C <sub>26</sub> H <sub>51</sub> N <sub>2</sub> O <sub>8</sub> | 519.3640 | -0.7      |
|           | C <sub>26</sub> H <sub>44</sub> N <sub>10</sub> Na            | 519.3643 | -0.2      |

**Figure 66** HRMS of **11b**: *Top*: experimental HRMS spectrum. *Bottom*: simulated spectrum.

**Acquisition Parameter**

|             |            |                      |        |                  |           |
|-------------|------------|----------------------|--------|------------------|-----------|
| Source Type | ESI        | Set Capillary        | 3500 V | Set Nebulizer    | 0.4 Bar   |
| Focus       | Not active | Set End Plate Offset | -500 V | Set Dry Heater   | 200 °C    |
| Scan Begin  | 50 m/z     | Set Charging Voltage | 2000 V | Set Dry Gas      | 4.0 l/min |
| Scan End    | 2000 m/z   | Set Corona           | 0 nA   | Set Divert Valve | Waste     |
|             |            |                      |        | Set APCI Heater  | 0 °C      |

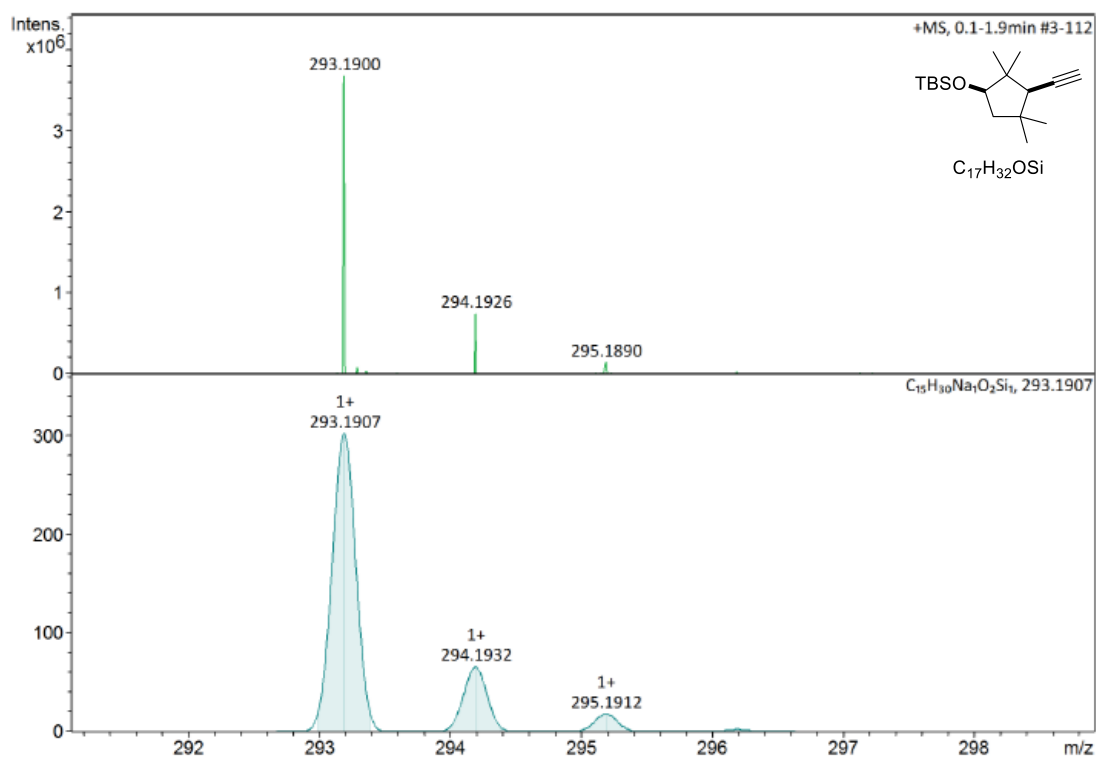

| Meas. m/z | Ion Formula                                                      | m/z      | err [ppm] |
|-----------|------------------------------------------------------------------|----------|-----------|
| 287.1459  | C <sub>17</sub> H <sub>23</sub> O <sub>2</sub> Si                | 287.1462 | 0.9       |
|           | C <sub>9</sub> H <sub>16</sub> N <sub>10</sub> Na                | 287.1452 | -2.7      |
| 293.1900  | C <sub>15</sub> H <sub>30</sub> NaO <sub>2</sub> Si              | 293.1907 | 2.6       |
| 303.2106  | C <sub>14</sub> H <sub>31</sub> N <sub>2</sub> O <sub>3</sub> Si | 303.2098 | -2.6      |
|           | C <sub>17</sub> H <sub>32</sub> NaOSi                            | 303.2115 | 2.7       |
| 311.2006  | C <sub>13</sub> H <sub>27</sub> N <sub>6</sub> O <sub>5</sub> Si | 311.2010 | 1.3       |
|           | C <sub>15</sub> H <sub>32</sub> NaO <sub>3</sub> Si              | 311.2013 | 2.2       |
| 351.2316  | C <sub>15</sub> H <sub>35</sub> N <sub>2</sub> O <sub>5</sub> Si | 351.2310 | -1.9      |
|           | C <sub>18</sub> H <sub>36</sub> NaO <sub>3</sub> Si              | 351.2326 | 2.7       |
| 451.3020  | C <sub>29</sub> H <sub>43</sub> O <sub>2</sub> Si                | 451.3027 | 1.6       |
|           | C <sub>27</sub> H <sub>44</sub> NaO <sub>2</sub> Si              | 451.3003 | -3.8      |
| 563.3902  | C <sub>32</sub> H <sub>51</sub> N <sub>6</sub> O <sub>5</sub> Si | 563.3888 | -2.4      |
|           | C <sub>34</sub> H <sub>56</sub> NaO <sub>3</sub> Si              | 563.3891 | -1.9      |

**Figure 67** HRMS of **11c**: *Top*: experimental HRMS spectrum. *Bottom*: simulated spectrum.

**Acquisition Parameter**

|             |            |                      |        |                  |           |
|-------------|------------|----------------------|--------|------------------|-----------|
| Source Type | ESI        | Set Capillary        | 3500 V | Set Nebulizer    | 0.5 Bar   |
| Focus       | Not active | Set End Plate Offset | -500 V | Set Dry Heater   | 200 °C    |
| Scan Begin  | 50 m/z     | Set Charging Voltage | 2000 V | Set Dry Gas      | 4.0 l/min |
| Scan End    | 1500 m/z   | Set Corona           | 0 nA   | Set Divert Valve | Waste     |
|             |            |                      |        | Set APCI Heater  | 0 °C      |

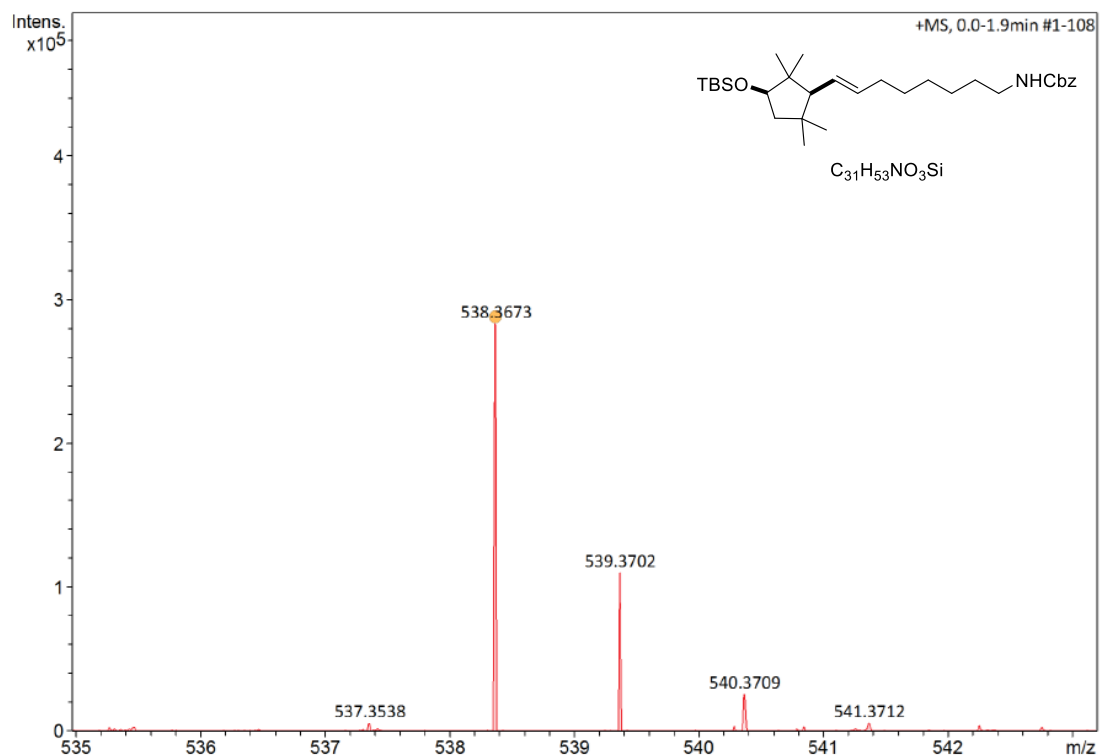

| Meas. m/z | Ion Formula    | m/z      | err [ppm] |
|-----------|----------------|----------|-----------|
| 295.1936  | C13H31O5Si     | 295.1935 | -0.3      |
| 323.2249  | C15H35O5Si     | 323.2248 | -0.1      |
| 538.3673  | C27H49N7NaOSi  | 538.3660 | -2.3      |
|           | C29H54NNa2O3Si | 538.3663 | -1.8      |
|           | C31H53NNaO3Si  | 538.3687 | 2.7       |

**Figure S-68** HRMS of **11**: *Top*: experimental HRMS spectrum.

**Acquisition Parameter**

|             |            |                      |        |                  |           |
|-------------|------------|----------------------|--------|------------------|-----------|
| Source Type | ESI        | Set Capillary        | 3500 V | Set Nebulizer    | 0.4 Bar   |
| Focus       | Not active | Set End Plate Offset | -500 V | Set Dry Heater   | 200 °C    |
| Scan Begin  | 50 m/z     | Set Charging Voltage | 2000 V | Set Dry Gas      | 4.0 l/min |
| Scan End    | 2000 m/z   | Set Corona           | 0 nA   | Set Divert Valve | Waste     |
|             |            |                      |        | Set APCI Heater  | 0 °C      |

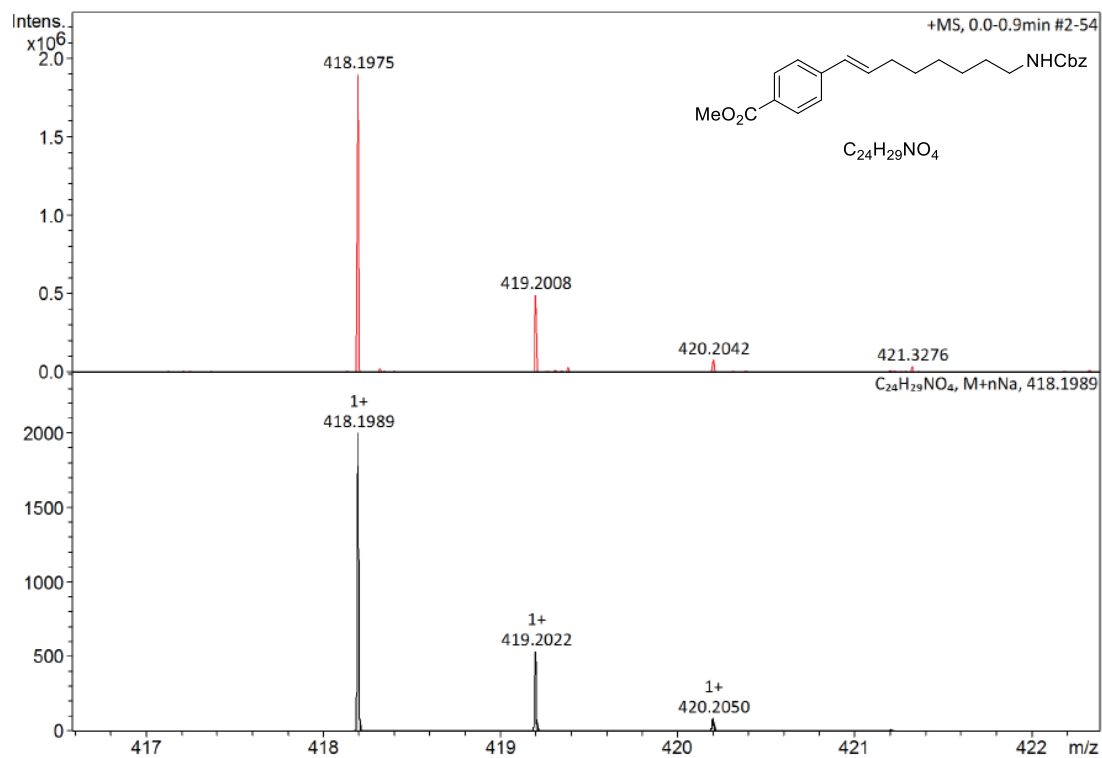

| Meas. m/z | Ion Formula                                                     | m/z      | err [ppm] |
|-----------|-----------------------------------------------------------------|----------|-----------|
| 418.1975  | C <sub>21</sub> H <sub>28</sub> N <sub>3</sub> O <sub>6</sub>   | 418.1973 | -0.5      |
|           | C <sub>24</sub> H <sub>29</sub> NNaO <sub>4</sub>               | 418.1989 | 3.4       |
|           | C <sub>20</sub> H <sub>25</sub> N <sub>7</sub> NaO <sub>2</sub> | 418.1962 | -3.1      |
| 434.1713  | C <sub>24</sub> H <sub>24</sub> N <sub>3</sub> O <sub>5</sub>   | 434.1710 | -0.7      |
|           | C <sub>23</sub> H <sub>21</sub> N <sub>7</sub> NaO              | 434.1700 | -3.1      |
|           | C <sub>27</sub> H <sub>25</sub> NNaO <sub>3</sub>               | 434.1727 | 3.0       |

**Figure S-69** HRMS of **12**: *Top*: experimental HRMS spectrum. *Bottom*: simulated spectrum.

**Acquisition Parameter**

|             |            |                      |        |                  |           |
|-------------|------------|----------------------|--------|------------------|-----------|
| Source Type | ESI        | Set Capillary        | 3500 V | Set Nebulizer    | 0.4 Bar   |
| Focus       | Not active | Set End Plate Offset | -500 V | Set Dry Heater   | 200 °C    |
| Scan Begin  | 50 m/z     | Set Charging Voltage | 2000 V | Set Dry Gas      | 4.0 l/min |
| Scan End    | 2000 m/z   | Set Corona           | 0 nA   | Set Divert Valve | Waste     |
|             |            |                      |        | Set APCI Heater  | 0 °C      |

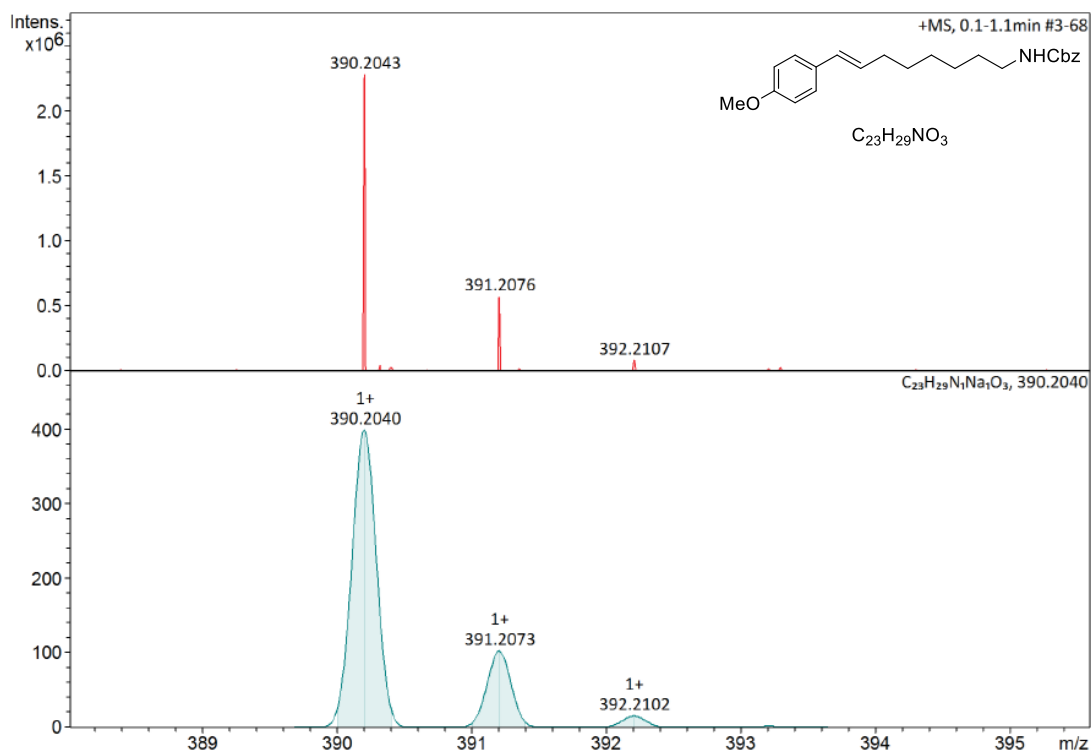

| Meas. m/z | Ion Formula          | m/z      | err [ppm] |
|-----------|----------------------|----------|-----------|
| 390.2043  | $C_{21}H_{24}N_7O$   | 390.2037 | -1.5      |
|           | $C_{23}H_{29}NNaO_3$ | 390.2040 | -0.8      |
| 406.1782  | $C_{24}H_{20}N_7$    | 406.1775 | -1.8      |
|           | $C_{26}H_{25}NNaO_2$ | 406.1777 | -1.1      |

**Figure 70** HRMS of **13**: *Top*: experimental HRMS spectrum. *Bottom*: simulated spectrum.

**Acquisition Parameter**

|             |            |                      |        |                  |           |
|-------------|------------|----------------------|--------|------------------|-----------|
| Source Type | ESI        | Set Capillary        | 4000 V | Set Nebulizer    | 0.5 Bar   |
| Focus       | Not active | Set End Plate Offset | -500 V | Set Dry Heater   | 200 °C    |
| Scan Begin  | 50 m/z     | Set Charging Voltage | 2000 V | Set Dry Gas      | 4.0 l/min |
| Scan End    | 1500 m/z   | Set Corona           | 0 nA   | Set Divert Valve | Source    |
|             |            |                      |        | Set APCI Heater  | 0 °C      |

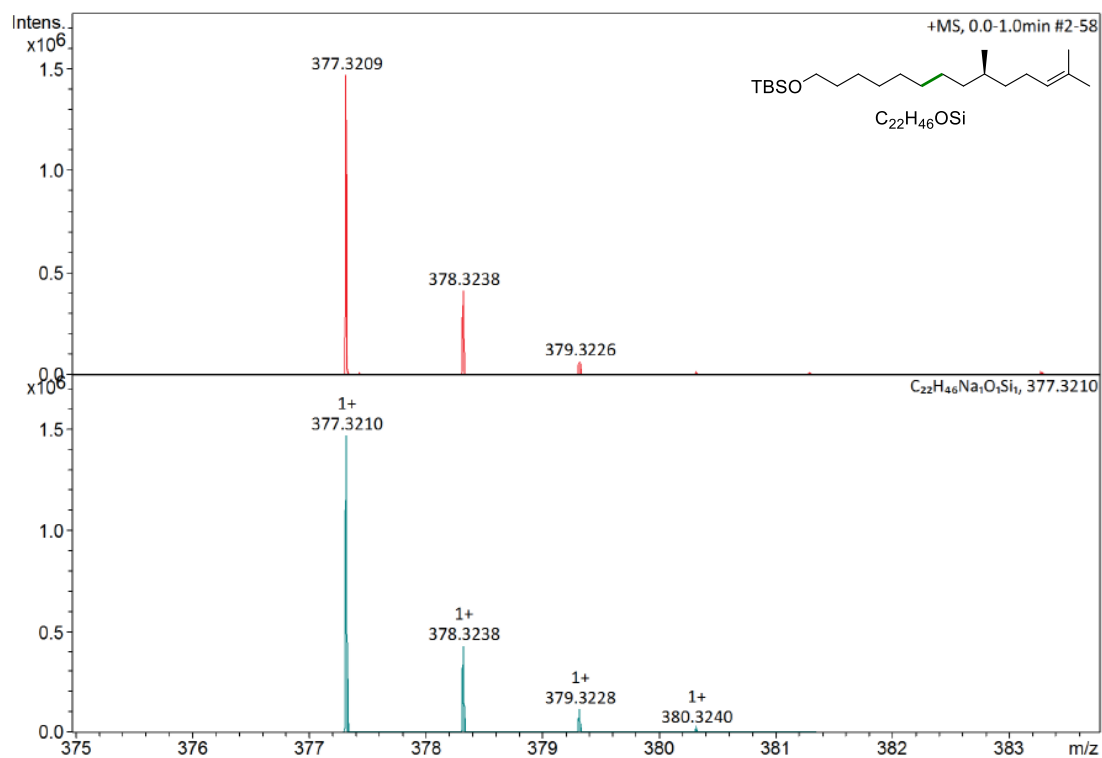

| Meas. m/z | Ion Formula                           | m/z      | err [ppm] |
|-----------|---------------------------------------|----------|-----------|
| 377.3209  | C <sub>22</sub> H <sub>46</sub> NaOSi | 377.3210 | 0.3       |

**Figure S-71** HRMS of 14: *Top*: experimental HRMS spectrum. *Bottom*: simulated spectrum.

## References

- (1) Takahashi, K.; Arai, Y.; Ikegami-Kawai, M.; Honda, T. The formal synthesis of (+)-15-deoxy- $\Delta^{12,14}$ -prostaglandin J<sub>2</sub> by utilizing SmI<sub>2</sub>-promoted intramolecular coupling of bromoalkynes and  $\alpha,\beta$ -unsaturated esters. *Tetrahedron* **2020**, *76* (19), 131148.
- (2) DeLuca, R. J.; Edwards, J. L.; Steffens, L. D.; Michel, B. W.; Qiao, X. Z., C.; Cook, S. P.; Sigman, M. S. Wacker-Type Oxidation of Internal Alkenes using Pd(Quinox) and TBHP. *J. Org. Chem.* **2013**, *78* (4), 1682–1686.
- (3) Xing, Y.; O’Doherty, G. A. De Novo Asymmetric Synthesis of Cladospolide B–D: Structural Reassignment of Cladospolide D via the Synthesis of its Enantiomer. *Org. Lett.* **2009**, *11* (5), 1107–1110.
